# Supplementary material for: Multi-resonance emitters with room-temperature phosphorescence in amorphous state and excited by visible light
Source: Royal Society of Chemistry journal article supplement (doi:10.1039/d4sc05383d), 2024-01-01
Supplement: d4sc05383d1.pdf [file d4sc05383d1.pdf]

## Supporting Information

### **Multi-Resonance Emitters with Room-Temperature Phosphorescence in Amorphous State and Excited by Visible Light**

Baoyun Du<sup>1,2</sup>, Yuliang Wu<sup>1,2</sup>, Xingdong Wang<sup>1</sup>, Hongkun Tian<sup>1</sup>, Shiyang Shao<sup>1,3\*</sup>, Lixiang Wang<sup>1,2\*</sup>

<sup>1</sup>State Key Laboratory of Polymer Physics and Chemistry, Changchun Institute of Applied Chemistry, Chinese Academy of Sciences, Changchun 130022, P. R. China

<sup>2</sup>School of Applied Chemistry and Engineering, University of Science and Technology of China, Hefei 230026, P. R. China

<sup>3</sup>School of Materials Sciences and Engineering, Hainan University, Haikou 570228, P. R. China

\* Corresponding author. Email: [ssyang@hainanu.edu.cn](mailto:ssyang@hainanu.edu.cn); [lixiang@ciac.ac.cn](mailto:lixiang@ciac.ac.cn)

## Table of contents

|                                                       |    |
|-------------------------------------------------------|----|
| Experimental Details.....                             | 3  |
| Synthetic Procedures.....                             | 6  |
| Single-Crystal Structures .....                       | 14 |
| Theoretical Calculations .....                        | 17 |
| Electrochemical Measurements .....                    | 24 |
| Thermal Properties.....                               | 25 |
| Photophysical Properties.....                         | 25 |
| References.....                                       | 32 |
| NMR Spectra .....                                     | 33 |
| High resolution mass spectrum.....                    | 51 |
| Cartesian coordinates (Å) for optimized geometry..... | 54 |

## Experimental Details

### General information

The chemicals and reagents were obtained from Sigma-Aldrich and Energy Chemical and used directly unless otherwise noted. Tetrahydrofuran and toluene were distilled from sodium/benzophenone, while *N, N*-dimethylformamide and *N*-methylpyrrolidone were dried by CaH<sub>2</sub> before use. <sup>1</sup>H and <sup>13</sup>C NMR spectrum were recorded by Bruker Avance NMR spectrometers in CDCl<sub>3</sub> or C<sub>2</sub>D<sub>2</sub>Cl<sub>4</sub> with tetramethylsilane as internal standard. Matrix-assisted laser desorption/ionization time-of-flight (MALDI-TOF) mass spectra was measured on AXIMA CFR MS apparatus (COMPACT). Thermal gravimetric analysis was performed on Perkin-Elmer-TGA 7 at heating rate of 10 °C/min with continuous nitrogen flow. Cyclic voltammetry was carried out in electrochemical workstation (Shanghai CH instruments, CHI610E) with three-electrode cell using *n*-Bu<sub>4</sub>NClO<sub>4</sub> (0.1 M) as supporting electrolyte and ferrocene as reference at a scan rate of 50 mV·s<sup>-1</sup>.

### Single-crystal analysis

Single crystals for the emitters were grown by slow sublimation of the samples under vacuum. The crystallographic data were collected by Bruker D8 VENTURE diffractometer equipped with graphite monochromated Cu K<sub>α</sub> radiation ( $\lambda = 1.54184 \text{ \AA}$ ) at 293 K, using the phi and omega scans technique. The structure was solved by direct methods, and all the non-hydrogen atoms were refined anisotropically on F2 by full-matrix least-squares using SHELXL package.

### Photophysical measurements

UV-visible absorption spectra were measured by PerkinElmer Lambda 35 UV-vis spectrometer, and steady-state photoluminescence (PL) spectra were measured by HORIBA FluoroMax spectrofluorometer. Transient PL spectra and time-resolved spectroscopy were detected on Edinburgh fluorescence spectrometer (FLSP-980). PLQY values were measured by integrating sphere coupled with a photonic multichannel analyzer on Hamamatsu Photonics C9920-2.

## Computational method

The calculations were performed with Gaussian 09 package using density functional theory (DFT) for HOMO/LUMO distributions, and time-dependent density functional theory (TD-DFT) for optimization of excited-state configuration and electron transition analysis at the M062X/def2SVP level of theory. The SOC matrix elements are calculated by ORCA software package (version 4.1) at the same theory level. Natural transition orbitals (NTO) were performed by Multiwfn (version 3.5)<sup>1</sup> and drawn by VMD software (version 1.9.3). The excited-state energy levels were calculated by SCS-CC2 calculations using the MRCC Program<sup>2</sup> with cc-pVDZ basis set to consider electron correlation in the form of double excitations<sup>3</sup>.

## Calculation for kinetic parameters

The calculation formulas for rate constant of radiative decay from S<sub>1</sub> ( $k_r^F$ ), radiative decay and non-radiative decay from T<sub>1</sub> ( $k_r^P$  and  $k_{nr}^P$ ), intersystem crossing ( $k_{ISC}$ ) from S<sub>1</sub> to T<sub>1</sub> and reverse intersystem crossing ( $k_{RISC}$ ) from T<sub>1</sub> to S<sub>1</sub> are expressed as follows. For  $\alpha$ -ThBSS,  $\alpha$ -DThBSS and  $\alpha$ -DThBSS-Cz with fluorescence and RTP emissions<sup>4</sup>:

$$\begin{aligned}k_r^F &= \Phi_F / \tau_F \\k_r^P &= \Phi_{Ph} / \tau_{Ph} \\k_{nr}^P &= (1 - \Phi_{Ph}) / \tau_{Ph} \\k_{ISC} &= \Phi_{Ph} / \tau_F\end{aligned}$$

where  $\tau_F$  and  $\tau_{Ph}$  are lifetimes of fluorescence and phosphorescence emissions, and  $\Phi_F$  and  $\Phi_{Ph}$  are quantum efficiencies for fluorescence and phosphorescence components. For  $\beta$ -ThBSS,  $\beta$ -DThBSS and  $\beta$ -DThBSS-Cz with TADF and RTP emissions<sup>5</sup>:

$$\begin{aligned}k_r^P &= \Phi_{Ph} / \tau_{Ph} \\k_{nr}^P &= (1 - \Phi_{Ph}) / \tau_{Ph} \\k_r^F &= \Phi_{PF} / \tau_p \\k_{ISC} &= (1 - \Phi_{PF}) / \tau_p \\k_{RISC} &= (\Phi_{PL} - \Phi_{PF}) R_{DE}^{DF} / [\Phi_{PF} (1 - \Phi_{PF}) \tau_d]\end{aligned}$$

where  $\tau_p$  and  $\tau_d$  are lifetimes of prompt and delayed emissions for TADF emission component, while  $\tau_{Ph}$  is lifetime of phosphorescence component.  $\Phi_{PL}$  is total photoluminescent quantum efficiency, while  $\Phi_{PF}$  and  $\Phi_{Ph}$  are quantum efficiency for prompt fluorescence and phosphorescence components respectively.  $R_{DE}^{DF}$  is the ratio of the delayed fluorescence component of the delayed. Note that due to the fast intersystem crossing process for B, S-doped PAHs, the non-radiative decay from S<sub>1</sub> ( $k_{nr}^F$ ) could be ignored, thus we assume that  $\Phi_{PF} + \Phi_{ISC} = 1$ .

### **Preparation of RTP films and patterning**

The emitters ( $\alpha$ -ThBSS,  $\alpha$ -DThBSS and  $\alpha$ -DThBSS-Cz) are mixed (1 wt% for each emitter) with poly (methyl methacrylate) which are dissolved in chlorobenzene to form the inks with 10 mg/mL concentration. Then films with butterfly and digital patterns are fabricated by coating the prepared inks on wood-free paper via cotton swab, which are dried at room temperature under vacuum for 6 h. For multi-color anti-counterfeiting applications, the  $\alpha$ -DThBSS-Cz and  $\alpha$ -ThBSS ink was successively coated through a flower-shaped mask and a leaf-shaped mask on the same paper, and are dried at room temperature under vacuum for 6 h after each coating step.

## Synthetic Procedures

### *Benzo[b]thiophene-3-thiol (2)*

3-Bromobenzo[*b*]thiophene (**1**, 42.6 g, 200.0 mmol) was dissolved in tetrahydrofuran (THF) (300 mL) under argon atmosphere and cooled to -78 °C. Afterwards a solution of *n*-butyllithium in hexane (80.0 mL, 2.5 M, 200.0 mmol) was added dropwise and the mixture was stirred at -78 °C for 1 hour. After adding grounded sulfur (7.04 g, 220.0 mmol) in 3 portions, the mixture was kept at -78 °C for 3 hours and then quenched with 1 M aq. HCl (100 mL). After warming to room temperature, the organic layer was separated and the aqueous layer was extracted with ethyl acetate three times (100 mL×3). The combined organic phases were made alkaline with 1.5 M aq. NaOH (150 mL). The aqueous phase was separated and acidized by 1 M aq. HCl (250 mL) and then extracted three times with ethyl acetate (100 mL×3). The organic phases were combined and dried over anhydrous MgSO<sub>4</sub>. After the solvent was removed under vacuum, the product **2** was obtained as yellow liquid (25.2 g) and used directly for next step. Yield: 76%. <sup>1</sup>H NMR (400 MHz, CDCl<sub>3</sub>) δ 7.88 (dd, *J* = 8.8 Hz, 2H), 7.49-7.39 (m, 3H), 3.30 (s, 1H). <sup>13</sup>C NMR (126 MHz, CDCl<sub>3</sub>) δ 139.55, 139.40, 126.89, 124.82, 124.58, 122.82, 122.49, 118.93.

### *3-((2,5-Dibromo-3-fluorophenyl)thio)benzo[b]thiophene (3)*

A mixture of **2** (5.00 g, 30.1 mmol), 2,5-dibromo-1,3-difluorobenzene (9.00 g, 33.1 mmol) and K<sub>2</sub>CO<sub>3</sub> (8.32 g, 60.2 mmol) in dry *N*-methylpyrrolidone (NMP, 150 mL) was stirred at 60 °C for 24 hours under argon atmosphere and then cooled to room temperature. The mixture was slowly poured into deionized water (600 mL) and the aqueous layer was extracted with dichloromethane three times (100 mL×3). The combined organic fractions were dried over anhydrous MgSO<sub>4</sub> and the solvent was removed under vacuum. The crude product was purified by silica gel chromatography using hexane as eluent to afford **3** as a white solid (11.0 g). Yield: 88%. <sup>1</sup>H NMR (400 MHz, CDCl<sub>3</sub>) δ 7.96 (dd, *J* = 6.8, 1.6 Hz, 1H), 7.91 (s, 1H), 7.77 (dd, *J* = 6.8, 1.6 Hz, 1H), 7.46-7.43 (m, 2H), 7.04 (dd, *J* = 7.2, 1.6 Hz, 1H), 6.42 (s, 1H). <sup>13</sup>C NMR (126 MHz, CDCl<sub>3</sub>) δ 143.09, 140.14, 138.36, 135.69, 125.54, 125.36, 124.66, 123.21, 122.74, 121.45, 121.36, 121.00, 116.45, 116.19.

### *3-((2,5-Dibromo-3-(phenylthio)phenyl)thio)benzo[b]thiophene (4)*

A mixture of **3** (4.18 g, 10.0 mmol) and sodium thiophenolate (1.20 g, 9.0 mmol) in dry

NMP (100 mL) was stirred at 60 °C for 24 hours under argon atmosphere and then cooled to room temperature. The mixture was slowly poured into NH<sub>4</sub>Cl solution (400 mL), which was extracted with dichloromethane three times (50 mL×3). The combined organic fractions were dried over anhydrous MgSO<sub>4</sub> and the solvent was removed under vacuum. The crude product was purified by silica gel chromatography using hexane/dichloromethane (8/1, v/v) as eluent to afford **4** as a white solid (4.10 g). Yield: 90%. <sup>1</sup>H NMR (500 MHz, CDCl<sub>3</sub>) δ 7.95 (dd, *J* = 7.0, 2.5 Hz, 1H), 7.89 (s, 1H), 7.79 (dd, *J* = 7.0, 2.5 Hz, 1H), 7.54-7.51 (m, 2H), 7.45-7.42 (m, 5H), 6.54 (d, *J* = 2.0 Hz, 1H), 6.36 (d, *J* = 2.0 Hz, 1H). <sup>13</sup>C NMR (126 MHz, CDCl<sub>3</sub>) δ 143.13, 142.06, 140.09, 138.46, 135.37, 134.81, 131.15, 130.03, 129.59, 126.84, 125.75, 125.43, 125.25, 123.12, 122.86, 121.92, 121.77, 117.14.

#### ***7-Bromo-5,9,14-trithia-14b-borafluoreno[3,2,1-de]anthracene (α-ThBSS-Br)***

A solution of *n*-butyllithium in hexane (1.68 mL, 2.5 M, 4.2 mmol) was added slowly to a solution of **4** (2.03 g, 4.0 mmol) in anhydrous *m*-xylene (50 mL) at -30 °C under argon atmosphere. The reaction mixture was stirred for 30 minutes before heating at 40 °C for 1 hour. BBr<sub>3</sub> (0.46 mL, 4.8 mmol) was slowly added to the mixture at -30 °C, which was then heated to 50 °C and stirred for 3 hours. After addition of (*i*-Pr)<sub>2</sub>NEt (1.4 mL, 8.0 mmol) at 0 °C, the reaction mixture was stirred at 120 °C for 24 hours, which was then cooled to room temperature and slowly quenched by 2 mL deionized water. Subsequently, the reaction mixture was filtered and the residue was washed with methanol (40 mL) to afford the desired compound **α-ThBSS-Br** as a yellow solid (786.6 mg). Yield: 45%. <sup>1</sup>H NMR (500 MHz, CDCl<sub>3</sub>) δ 9.06 (d, *J* = 8.0 Hz, 1H), 8.08 (d, *J* = 8.0 Hz, 1H), 8.03 (d, *J* = 8.0 Hz, 1H), 7.83 (d, *J* = 1.5 Hz, 1H), 7.73 (d, *J* = 1.5 Hz, 1H), 7.64-7.57 (m, 3H), 7.54-7.49 (m, 2H). <sup>13</sup>C NMR (126 MHz, C<sub>2</sub>D<sub>2</sub>Cl<sub>4</sub>) δ 146.05, 144.42, 144.20, 142.81, 139.94, 138.11, 136.96, 131.65, 127.95, 125.44, 124.86, 124.59, 124.41, 124.29, 122.89, 122.54.

#### ***5,9,14-Trithia-14b-borafluoreno[3,2,1-de]anthracene (α-ThBSS)***

A mixture of **α-ThBSS-Br** (437.0 mg, 1.0 mmol), Pd(dppf)Cl<sub>2</sub> (22.0 mg, 0.03 mmol), *N,N,N',N'*-tetramethylethylenediamine (TMEDA, 27.8 mg, 5.0 mmol), NaBH<sub>4</sub> (230.4 mg, 5.0 mmol) and THF (50 mL) was stirred at room temperature under argon atmosphere for 12 hours. After the mixture was poured into deionized water (200 mL), the precipitate was filtered, dried under vacuum, and then subjected to silica gel chromatography using hexane/dichloromethane (6/1, v/v) as eluent to afford **α-ThBSS** as a yellow solid (304.0 mg). Yield: 85%. <sup>1</sup>H NMR (500 MHz, CDCl<sub>3</sub>) δ 9.07 (dd, *J* =

7.5, 1.0 Hz, 1H), 8.10 (d,  $J = 7.5$  Hz, 1H), 8.04 (d,  $J = 8.0$  Hz, 1H), 7.71 (dd,  $J = 7.5$ , 1.0 Hz, 1H), 7.63 (t,  $J = 7.5$  Hz, 2H), 7.60-7.48 (m, 5H).  $^{13}\text{C}$  NMR (126 MHz,  $\text{CDCl}_3$ )  $\delta$  143.90, 143.81, 143.31, 142.44, 140.39, 137.90, 136.93, 131.28, 129.38, 127.61, 125.36, 124.92, 124.53, 122.74, 122.46, 122.14, 121.68. High-Resolution Mass Spectra (HRMS): calcd for  $\text{C}_{20}\text{H}_{11}\text{BS}_3$ : 358.0116, found: 358.0098  $[\text{M}]^+$ . Anal. calcd (%): C, 67.04; H, 3.09; S, 26.84. found: C, 67.27; H, 2.98; S, 26.94. Melting point: 234 °C.

### ***Benzo[b]thiophene-2-thiol (6)***

A mixture of 2-bromobenzo[b]thiophene (**5**, 42.6 g, 200.0 mmol) and sodium thiomethoxide (57.6 g, 800.0 mmol) in dry *N,N*-dimethylformamide (DMF, 500 mL) was stirred at reflux for 12 hours under argon atmosphere. After cooling to room temperature, the mixture was slowly poured into 3 M aq. HCl (400 mL) and the aqueous layer was extracted with ethyl acetate three times (100 mL $\times$ 3). The combined organic phases were washed with brine three times (100 mL $\times$ 3) and were made alkaline with 1.5 M aq. NaOH (150 mL). The aqueous phase was separated and acidized by 1 M aq. HCl (250 mL) and then extracted three times with ethyl acetate (100 mL $\times$ 3). The organic phases were combined and dried over anhydrous  $\text{MgSO}_4$ . After the solvent was removed under vacuum, the product **6** was obtained as a yellow solid (26.5 g) and used directly for the next step. Yield: 80%.  $^1\text{H}$  NMR (500 MHz,  $\text{CDCl}_3$ )  $\delta$  7.72 (d,  $J = 8.0$  Hz, 1H), 7.65 (d,  $J = 7.5$  Hz, 1H), 7.31 (dd,  $J = 8.0, 7.5$  Hz, 2H), 7.28 (s, 1H), 3.68 (s, 1H).  $^{13}\text{C}$  NMR (126 MHz,  $\text{CDCl}_3$ )  $\delta$  141.64, 139.93, 128.67, 127.65, 124.53, 124.41, 122.82, 121.60.

### ***2-((2,5-Dibromo-3-fluorophenyl)thio)benzo[b]thiophene (7)***

A mixture of **6** (5.00 g, 30.1 mmol), 2,5-dibromo-1,3-difluorobenzene (9.00 g, 33.1 mmol) and  $\text{K}_2\text{CO}_3$  (8.32 g, 60.2 mmol) in dry NMP (150 mL) was stirred at 60 °C for 24 hours under argon atmosphere and then cooled to room temperature. The mixture was slowly poured into deionized water (600 mL) and the aqueous layer was extracted with dichloromethane three times (100 mL $\times$ 3). The combined organic fractions were dried over anhydrous  $\text{MgSO}_4$  and the solvent was removed under vacuum. The crude product was purified by silica gel chromatography using hexane as eluent to afford **7** as a white solid (9.80 g). Yield: 78%.  $^1\text{H}$  NMR (400 MHz,  $\text{CDCl}_3$ )  $\delta$  7.86-7.84 (m, 2H), 7.65 (s, 1H), 7.45-7.43 (m, 2H), 7.10 (dd,  $J = 7.6, 2.0$  Hz, 1H), 6.84 (s, 1H).  $^{13}\text{C}$  NMR (126 MHz,  $\text{CDCl}_3$ )  $\delta$  160.27, 157.76, 143.79, 143.49, 139.47, 134.95, 129.46, 125.99, 125.15, 124.92, 124.34, 122.45, 116.98, 116.77.



### **2-((2,5-Dibromo-3-(phenylthio)phenyl)thio)benzo[b]thiophene (8)**

A mixture of **7** (4.18 g, 10.0 mmol) and sodium thiophenolate (1.20 g, 9.0 mmol) in dry NMP (100 mL) was stirred at 60 °C for 24 hours under argon atmosphere and then cooled to room temperature. The mixture was slowly poured into NH<sub>4</sub>Cl solution (1 M, 400 mL), which was extracted with dichloromethane three times (50 mL×3). The combined organic fractions were dried over anhydrous MgSO<sub>4</sub> and the solvent was removed under vacuum. The crude product was purified by silica gel chromatography using hexane/dichloromethane (10/1, v/v) as eluent to afford **8** as a white solid (3.30 g). Yield: 72%. <sup>1</sup>H NMR (400 MHz, CDCl<sub>3</sub>) δ 7.85-7.82 (m, 2H), 7.63 (s, 1H), 7.53-7.51 (m, 2H), 7.46-7.44 (m, 3H), 7.43-7.41 (m, 2H), 6.79 (d, *J* = 2.0 Hz, 1H), 6.62 (d, *J* = 2.0 Hz, 1H). <sup>13</sup>C NMR (126 MHz, CDCl<sub>3</sub>) δ 143.74, 143.20, 142.54, 139.50, 134.76, 134.64, 131.18, 130.40, 130.06, 129.60, 127.51, 126.29, 125.84, 124.83, 124.26, 122.42, 122.17, 117.43.

### **7-Bromo-5,9,10-trithia-14c-borafluoreno[2,3,4-de]anthracene (β-ThBSS-Br)**

A solution of *n*-butyllithium in hexane (1.68 mL, 2.5 M, 4.2 mmol) was added slowly to a solution of **8** (2.03 g, 4.0 mmol) in anhydrous *m*-xylene (50 mL) at -30 °C under argon atmosphere. The reaction mixture was stirred for 30 minutes before heating at 40 °C for 1 hour. BBr<sub>3</sub> (0.46 mL, 4.8 mmol) was slowly added to the mixture at -30 °C, which was then heated to 50 °C and stirred for 3 hours. After addition of (*i*-Pr)<sub>2</sub>NEt (1.4 mL, 8.0 mmol) at 0 °C, the reaction mixture was stirred at 120 °C for 24 hours, which was then cooled to room temperature and slowly quenched by 2 mL deionized water. Subsequently, organic solvent in the reaction mixture was removed under vacuum, and the crude product was purified by silica gel chromatography using hexane/dichloromethane (8/1, v/v) as eluent to afford **β-ThBSS-Br** as a light-yellow solid (875.0 mg). Yield: 50%. <sup>1</sup>H NMR (500 MHz, CDCl<sub>3</sub>) δ 8.28 (dd, *J* = 8.0, 1.0 Hz, 1H), 8.09 (d, *J* = 7.5 Hz, 1H), 7.87 (d, *J* = 7.5 Hz, 1H), 7.77 (d, *J* = 1.5 Hz, 1H), 7.73 (d, *J* = 1.5 Hz, 1H), 7.68 (d, *J* = 8.0 Hz, 1H), 7.56 (t, *J* = 8.0 Hz, 1H), 7.36 (t, *J* = 8.0 Hz, 1H), 7.33-7.29 (m, 2H). <sup>13</sup>C NMR (126 MHz, CDCl<sub>3</sub>) δ 152.61, 144.62, 142.57, 141.96, 141.81, 139.09, 137.78, 131.51, 125.87, 125.34, 124.81, 124.74, 124.29, 123.82, 123.68, 121.55.

### **5,9,10-Trithia-14c-borafluoreno[2,3,4-de]anthracene (β-ThBSS)**

A mixture of **β-ThBSS-Br** (437.0 mg, 1.0 mmol), Pd(dppf)Cl<sub>2</sub> (22.0 mg, 0.03 mmol), TMEDA (27.8 mg, 5.0 mmol), NaBH<sub>4</sub> (230.4 mg, 5.0 mmol) and THF (50 mL) was

stirred at room temperature under argon atmosphere for 12 hours. After the mixture was poured into deionized water (200 mL), the precipitate was filtered, dried under vacuum, and then subjected to silica gel chromatography using hexane/dichloromethane (6/1, v/v) as eluent to afford  **$\beta$ -ThBSS** as a light-yellow solid (286.5 mg). Yield: 80%. <sup>1</sup>H NMR (500 MHz, CDCl<sub>3</sub>)  $\delta$  8.29 (dd,  $J$  = 7.5, 1.5 Hz, 1H), 8.13 (d,  $J$  = 8.0 Hz, 1H), 7.87 (d,  $J$  = 8.0 Hz, 1H), 7.70 (d,  $J$  = 8.0 Hz, 1H), 7.65 (dd,  $J$  = 7.5, 1.0 Hz, 1H), 7.60 (d,  $J$  = 7.5, 1.0 Hz, 1H), 7.54 (t,  $J$  = 8.0 Hz, 1H), 7.50 (t,  $J$  = 7.5 Hz, 1H), 7.35 (t,  $J$  = 7.5 Hz, 1H), 7.30 (t,  $J$  = 7.5 Hz, 2H). <sup>13</sup>C NMR (126 MHz, CDCl<sub>3</sub>)  $\delta$  154.30, 143.94, 143.67, 143.03, 142.05, 139.98, 138.75, 132.23, 130.15, 126.84, 126.28, 125.52, 125.38, 125.15, 123.36, 122.46, 122.42. HRMS: calcd for C<sub>20</sub>H<sub>11</sub>BS<sub>3</sub>: 358.0116, found: 358.0111 [M]<sup>+</sup>. Anal. calcd (%): C, 67.04; H, 3.09; S, 26.84. found: C, 67.31; H, 2.93; S, 27.14. Melting point: 217 °C.

### **3,3'-((2,5-Dibromo-1,3-phenylene)bis(sulfanediyl))bis(benzo[*b*]thiophene) (9)**

A mixture of **2** (13.3 g, 80.0 mmol), 2,5-dibromo-1,3-difluorobenzene (10.9 g, 40.0 mmol) and K<sub>2</sub>CO<sub>3</sub> (22.1 g, 160.0 mmol) in dry NMP (200 mL) was stirred at 60 °C for 48 hours under argon atmosphere and then cooled to room temperature. The mixture was slowly poured into NH<sub>4</sub>Cl solution (1 M, 600 mL) and the precipitate was filtered and dried in vacuum at 80 °C. Afterwards, the crude product was purified by silica gel chromatography using cyclohexane/dichloromethane (6/1, v/v) as eluent to afford **9** as a white solid (13.1 g). Yield: 58%. <sup>1</sup>H NMR (500 MHz, CDCl<sub>3</sub>)  $\delta$  7.94-7.92 (m, 2H), 7.92 (s, 2H), 7.80-7.78 (m, 2H), 7.44-7.42 (m, 4H), 6.32 (s, 2H). <sup>13</sup>C NMR (126 MHz, CDCl<sub>3</sub>)  $\delta$  142.05, 140.10, 138.51, 135.43, 125.62, 125.45, 125.28, 123.15, 122.86, 122.00, 121.67, 115.93.

### **7-Bromo-5,9,14,15-tetrathia-14*b*-boradiindeno[2,1-*a*:1',2'-*j*]phenalene ( $\alpha$ -DThBSS-Br)**

A solution of *n*-butyllithium in hexane (5.04 mL, 2.5 M, 12.6 mmol) was added slowly to a solution of **9** (6.77 g, 12.0 mmol) in anhydrous *m*-xylene (200 mL) at -30 °C under argon atmosphere. The reaction mixture was stirred for 30 minutes before heating at 40 °C for 1 hour. BBr<sub>3</sub> (1.39 mL, 14.4 mmol) was slowly added to the mixture at -30 °C, which was then heated to 50 °C and stirred for 3 hours. After addition of (i-Pr)<sub>2</sub>NEt (4.18 mL, 24.0 mmol) at 0 °C, the reaction mixture was stirred at 120 °C for 24 hours, which was then cooled to room temperature and slowly quenched by 6 mL deionized water. Subsequently, the reaction mixture was filtered, and the residue was washed with acetone (30 mL) to afford the desired compound  **$\alpha$ -DThBSS-Br** as a yellow solid (1.18

g). Yield: 20%. <sup>1</sup>H NMR (500 MHz, C<sub>2</sub>D<sub>2</sub>Cl<sub>4</sub>) δ 8.15-8.07 (m, 4H), 7.92 (s, 2H), 7.66-7.54 (m, 4H). <sup>13</sup>C NMR could not be measured due to its poor solubility.

#### ***5,9,14,15-Tetrathia-14b-boradiindeno[2,1-a:1',2'-j]phenalene (α-DThBSS)***

A mixture of **α-DThBSS-Br** (492.0 mg, 1.0 mmol), Pd(dppf)Cl<sub>2</sub> (22.0 mg, 0.03 mmol), TMEDA (27.8 mg, 5.0 mmol), NaBH<sub>4</sub> (230.4 mg, 5.0 mmol) and THF (80 mL) was stirred at room temperature under argon atmosphere for 12 hours. After the mixture was poured into deionized water (200 mL), the precipitate was filtered, dried under vacuum, and then subjected to silica gel chromatography using cyclohexane/dichloromethane (4/1, v/v) as eluent to afford **α-DThBSS** as a yellow solid (200.0 mg). Yield: 48%. <sup>1</sup>H NMR (500 MHz, C<sub>2</sub>D<sub>2</sub>Cl<sub>4</sub>) δ 8.10 (t, *J* = 8.5 Hz, 4H), 7.78 (d, *J* = 8.0 Hz, 2H), 7.62-7.59 (m, 3H), 7.56 (t, *J* = 8.0 Hz, 2H). <sup>13</sup>C NMR (126 MHz, C<sub>2</sub>D<sub>2</sub>Cl<sub>4</sub>) δ 144.43, 142.90, 137.16, 129.16, 127.69, 124.72, 123.19, 122.94, 122.47. HRMS: calcd for C<sub>22</sub>H<sub>11</sub>BS<sub>4</sub>: 413.9837, found: 413.9823 [M]<sup>+</sup>. Anal. calcd (%): C, 63.77; H, 2.68; S, 30.95. found: C, 63.75; H, 2.51; S, 30.97. Melting point was not observed before decomposition temperature.

#### ***9-(5,9,14,15-Tetrathia-14b-boradiindeno[2,1-a:1',2'-j]phenalen-7-yl)-3,6-di-tert-butyl-9H-carbazole (α-DThBSS-Cz)***

A mixture of **α-DThBSS-Br** (591.6 mg, 1.2 mmol), 3,6-bis(*t*-butyl)carbazole (402.3 mg, 1.44 mmol), Pd<sub>2</sub>(dba)<sub>3</sub> (22.0 mg, 0.024 mmol), *t*-Bu<sub>3</sub>P·BF<sub>4</sub> (27.8 mg, 0.096 mmol), sodium *t*-butoxide (230.4 g, 2.4 mmol) and toluene (50 mL) was heated to 100 °C and stirred for 12 hours under argon. After cooling to room temperature, the mixture was washed with brine (100 mL). The organic phase was dried over anhydrous MgSO<sub>4</sub>, and the solvent was removed under vacuum. The crude product was purified by silica gel chromatography using cyclohexane/dichloromethane (4/1, v/v) as eluent to afford **α-DThBSS-Cz** as a yellow solid (580.6 mg). Yield: 70%. <sup>1</sup>H NMR (500 MHz, CDCl<sub>3</sub>) δ 8.18 (d, *J* = 1.5 Hz, 2H), 8.06 (d, *J* = 8.0 Hz, 2H), 8.02 (d, *J* = 7.5 Hz, 2H), 7.96 (s, 2H), 7.59-7.50 (m, 8H), 1.50 (s, 18H). <sup>13</sup>C NMR (126 MHz, CDCl<sub>3</sub>) δ 145.31, 144.97, 144.87, 140.04, 140.01, 139.60, 137.76, 128.61, 125.64, 125.01, 124.09, 123.28, 120.75, 117.49, 110.34. HRMS: calcd for C<sub>42</sub>H<sub>34</sub>BNS<sub>4</sub>: 691.1667, found: 691.1638 [M]<sup>+</sup>. Anal. calcd (%): C, 72.92; H, 4.95; N, 2.02; S, 18.54. found: C, 73.22; H, 4.88; N, 2.07; S, 18.68. Melting point was not observed before decomposition temperature.

#### ***2,2'-((2,5-Dibromo-1,3-phenylene)bis(sulfanediyl))bis(benzo[*b*]thiophene) (10)***

A mixture of **6** (13.3 g, 80.0 mmol), 2,5-dibromo-1,3-difluorobenzene (10.9 g, 40.0

mmol) and  $K_2CO_3$  (22.1 g, 160.0 mmol) in dry NMP (200 mL) was stirred at 60 °C for 48 hours under argon atmosphere and then cooled to room temperature. The mixture was slowly poured into  $NH_4Cl$  solution (1 M, 600 mL) and the precipitate was filtered and dried under vacuum at 80 °C. Afterwards, the crude product was purified by silica gel chromatography using cyclohexane/dichloromethane (6/1, v/v) as eluent to afford **10** as a white solid (14.6 g). Yield: 65%.  $^1H$  NMR (500 MHz,  $CDCl_3$ )  $\delta$  7.85-7.83 (m, 4H), 7.63 (s, 2H), 7.43-7.41 (m, 4H), 6.82 (s, 2H).  $^{13}C$  NMR (126 MHz,  $CDCl_3$ )  $\delta$  143.75, 142.54, 139.49, 134.71, 130.19, 126.70, 125.87, 124.85, 124.28, 122.46, 122.43.

**8-Bromo-5,6,10,11-tetrathia-15c-boradiindeno[1,2-a:2',1'-j]phenalene ( $\beta$ -DThBSS-Br)**

A solution of *n*-butyllithium in hexane (5.04 mL, 2.5 M, 12.6 mmol) was added slowly to a solution of **9** (6.77 g, 12.0 mmol) in anhydrous *m*-xylene (200 mL) at -30 °C under argon atmosphere. The reaction mixture was stirred for 30 minutes before heating at 40 °C for 1 hour.  $BBr_3$  (1.39 mL, 14.4 mmol) was slowly added to the mixture at -30 °C, which was then heated to 50 °C and stirred for 3 hours. After addition of (*i*-Pr) $_2$ NEt (4.18 mL, 24.0 mmol) at 0 °C, the reaction mixture was stirred at 120 °C for 24 hours, which was then cooled to room temperature and slowly quenched by 6 mL deionized water. Subsequently, the reaction mixture was filtered, and the residue was washed with methanol (30 mL) to afford the desired compound  **$\beta$ -DThBSS-Br** as a light-yellow solid (3.55 g). Yield: 60%.  $^1H$  NMR (500 MHz,  $CDCl_3$ )  $\delta$  7.87 (d,  $J$  = 8.0 Hz, 2H), 7.81 (s, 2H), 7.33 (dd,  $J$  = 8.0, 8.0 Hz, 4H), 7.07 (t,  $J$  = 8.0 Hz, 2H).  $^{13}C$  NMR (126 MHz,  $CDCl_3$ )  $\delta$  151.49, 142.35, 141.17, 138.75, 126.82, 124.82, 124.67, 124.10, 121.19.

**5,6,10,11-Tetrathia-15c-boradiindeno[1,2-a:2',1'-j]phenalene ( $\beta$ -DThBSS)**

A mixture of  **$\beta$ -DThBSS-Br** (493.0 mg, 1.0 mmol),  $Pd(dppf)Cl_2$  (22.0 mg, 0.03 mmol), TMEDA (27.8 mg, 5.0 mmol),  $NaBH_4$  (230.4 mg, 5.0 mmol) and THF (50 mL) was stirred at room temperature under argon atmosphere for 12 hours. After the mixture was poured into deionized water (200 mL), the precipitate was filtered, dried under vacuum, and then subjected to silica gel chromatography using hexane/dichloromethane (4/1, v/v) as eluent to afford  **$\beta$ -DThBSS** as a light-yellow solid (273.0 mg). Yield: 66%.  $^1H$  NMR (500 MHz,  $CDCl_3$ )  $\delta$  7.87 (d,  $J$  = 8.0 Hz, 2H), 7.68 (d,  $J$  = 7.5 Hz, 2H), 7.51 (t,  $J$  = 7.5 Hz, 1H), 7.34 (d,  $J$  = 8.0 Hz, 2H), 7.30 (t,  $J$  = 7.0 Hz, 2H), 7.07 (t,  $J$  = 7.0 Hz, 2H).  $^{13}C$  NMR (126 MHz,  $CDCl_3$ )  $\delta$  152.18, 141.36, 140.79, 138.63, 128.35, 126.74, 124.44, 123.96, 122.42, 121.09. HRMS: calcd for  $C_{22}H_{11}BS_4$ : 413.9837, found:

413.9792 [M]<sup>+</sup>. Anal. calcd (%): C, 63.77; H, 2.68; S, 30.95. found: C, 63.85; H, 2.50; S, 31.26. Melting point: 268 °C.

**9-(5,6,10,11-Tetrathia-15c-boradiindenol[1,2-*a*:2',1'-*j*]phenalen-8-yl)-3,6-di-*tert*-butyl-9H-carbazole ( $\beta$ -DThBSS-Cz)**

A mixture of  $\beta$ -DThBSS-Br (591.6 mg, 1.2 mmol), 3,6-bis(*t*-butyl)carbazole (402.3 mg, 1.44 mmol), Pd<sub>2</sub>(dba)<sub>3</sub> (22.0 mg, 0.024 mmol), *t*-Bu<sub>3</sub>P·BF<sub>4</sub> (27.8 mg, 0.096 mmol), sodium *t*-butoxide (230.4 g, 2.4 mmol) and toluene (50 mL) was heated to 100 °C and stirred for 12 hours under argon. After cooling to room temperature, the mixture was washed with brine (100 mL). The organic phase was dried over anhydrous MgSO<sub>4</sub>, and the solvent was removed under vacuum. The crude product was purified by silica gel chromatography using hexane/dichloromethane (4/1, v/v) as eluent to afford  $\beta$ -DThBSS-Cz as a light-yellow solid (655.0 mg). Yield: 79%. <sup>1</sup>H NMR (500 MHz, CDCl<sub>3</sub>)  $\delta$  8.16 (d, *J* = 1.5 Hz, 2H), 7.92 (s, 2H), 7.89 (d, *J* = 8.0 Hz, 2H), 7.50 (dd, *J* = 8.5, 1.5 Hz, 2H), 7.47 (d, *J* = 8.5 Hz, 2H), 7.39 (d, *J* = 8.0 Hz, 2H), 7.33 (t, *J* = 7.5 Hz, 2H), 7.10 (t, *J* = 7.5 Hz, 2H), 1.49 (s, 18H). <sup>13</sup>C NMR (126 MHz, CDCl<sub>3</sub>)  $\delta$  151.72, 143.88, 142.54, 141.31, 138.76, 138.68, 138.35, 126.84, 124.62, 124.09, 124.02, 123.96, 121.19, 119.75, 116.52, 109.21. HRMS: calcd for C<sub>42</sub>H<sub>34</sub>BNS<sub>4</sub>: 691.1667, found: 691.1694 [M]<sup>+</sup>. Anal. calcd (%): C, 72.92; H, 4.95; N, 2.02; S, 18.54. found: C, 73.22; H, 4.88; N, 2.05; S, 18.49. Melting point: 347 °C.

## Single-Crystal Structures

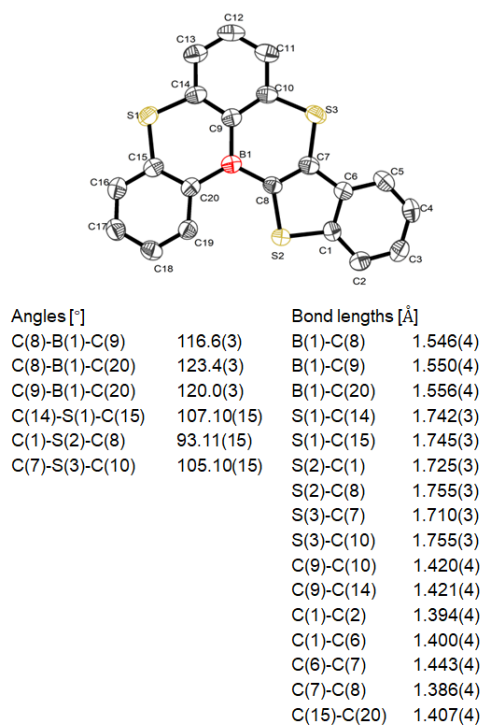

|                                       |                                                                                                             |
|---------------------------------------|-------------------------------------------------------------------------------------------------------------|
| Empirical formula                     | $C_{20}H_{11}BS_3$                                                                                          |
| Formula weight                        | 358.28                                                                                                      |
| Temperature                           | 301(2) K                                                                                                    |
| Wavelength                            | 0.71073 Å                                                                                                   |
| Crystal system                        | Orthorhombic                                                                                                |
| Space group                           | $P2(1)2(1)2(1)$                                                                                             |
| Unit cell dimensions                  | $a = 3.9616(2)$ Å $a = 90^\circ$<br>$b = 19.6770(11)$ Å $b = 90^\circ$<br>$c = 19.9810(9)$ Å $c = 90^\circ$ |
| Volume                                | $1557.57(14)$ Å <sup>3</sup>                                                                                |
| Z                                     | 4                                                                                                           |
| Calculated density                    | 1.528 Mg/m <sup>3</sup>                                                                                     |
| Absorption coefficient                | $0.472$ mm <sup>-1</sup>                                                                                    |
| F(000)                                | 736                                                                                                         |
| Crystal size                          | $0.21 \times 0.19 \times 0.16$ mm <sup>3</sup>                                                              |
| Theta range for data collection       | $2.29$ to $33.75^\circ$                                                                                     |
| Limiting indices                      | $-6 \leq h \leq 5$ , $-25 \leq k \leq 30$ , $-30 \leq l \leq 31$                                            |
| Reflections collected / unique        | 21434 / 6188 [R(int) = 0.0557]                                                                              |
| Completeness to theta = $33.75^\circ$ | 99.6%                                                                                                       |
| Absorption correction                 | None                                                                                                        |
| Max. and min. transmission            | 0.9282 and 0.9073                                                                                           |
| Refinement method                     | Full-matrix least-squares on F <sup>2</sup>                                                                 |
| Data / restraints / parameters        | 6188 / 0 / 217                                                                                              |
| Goodness-of-fit on F <sup>2</sup>     | 1.007                                                                                                       |
| Final R indices [I > 2sigma(I)]       | R1 = 0.0585, wR2 = 0.1252                                                                                   |
| R indices (all data)                  | R1 = 0.1268, wR2 = 0.1575                                                                                   |
| Absolute structure parameter          | 0.08(4)                                                                                                     |
| Largest diff. peak and hole           | 0.806 and -0.320 e. Å <sup>-3</sup>                                                                         |

**Figure S1.** X-ray crystal structure and refinement information for  $\alpha$ -ThBSS (Thermal ellipsoids are set at 50% probability level).

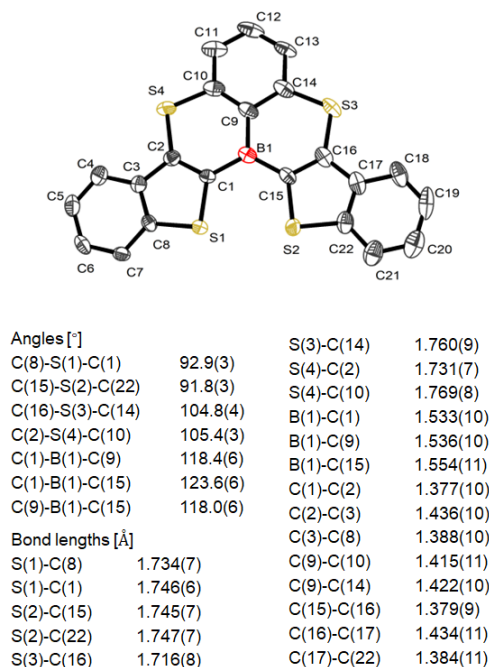

|                                       |                                                                                                                    |
|---------------------------------------|--------------------------------------------------------------------------------------------------------------------|
| Empirical formula                     | $C_{22}H_{11}BS_4$                                                                                                 |
| Formula weight                        | 414.36                                                                                                             |
| Temperature                           | 293(2) K                                                                                                           |
| Wavelength                            | 0.71073 Å                                                                                                          |
| Crystal system                        | Monoclinic                                                                                                         |
| Space group                           | $P2(1)/n$                                                                                                          |
| Unit cell dimensions                  | $a = 15.8412(18)$ Å $a = 90^\circ$<br>$b = 3.9132(4)$ Å $b = 102.031(3)^\circ$<br>$c = 28.452(3)$ Å $c = 90^\circ$ |
| Volume                                | $1725.0(3)$ Å <sup>3</sup>                                                                                         |
| Z                                     | 4                                                                                                                  |
| Calculated density                    | 1.596 Mg/m <sup>3</sup>                                                                                            |
| Absorption coefficient                | $0.555$ mm <sup>-1</sup>                                                                                           |
| F(000)                                | 848                                                                                                                |
| Crystal size                          | $0.21 \times 0.19 \times 0.12$ mm <sup>3</sup>                                                                     |
| Theta range for data collection       | $1.36$ to $24.67^\circ$                                                                                            |
| Limiting indices                      | $-18 \leq h \leq 18$ , $-4 \leq k \leq 4$ , $-33 \leq l \leq 33$                                                   |
| Reflections collected / unique        | 18495 / 2891 [R(int) = 0.0456]                                                                                     |
| Completeness to theta = $24.67^\circ$ | 98.1%                                                                                                              |
| Absorption correction                 | None                                                                                                               |
| Max. and min. transmission            | 0.9364 and 0.8923                                                                                                  |
| Refinement method                     | Full-matrix least-squares on F <sup>2</sup>                                                                        |
| Data / restraints / parameters        | 2891 / 0 / 244                                                                                                     |
| Goodness-of-fit on F <sup>2</sup>     | 1.105                                                                                                              |
| Final R indices [I > 2sigma(I)]       | R1 = 0.0969, wR2 = 0.2766                                                                                          |
| R indices (all data)                  | R1 = 0.1050, wR2 = 0.2846                                                                                          |
| Largest diff. peak and hole           | 2.529 and -0.751 e. Å <sup>-3</sup>                                                                                |

**Figure S2.** X-ray crystal structure and refinement information for  $\alpha$ -DThBSS (Thermal ellipsoids are set at 50% probability level).

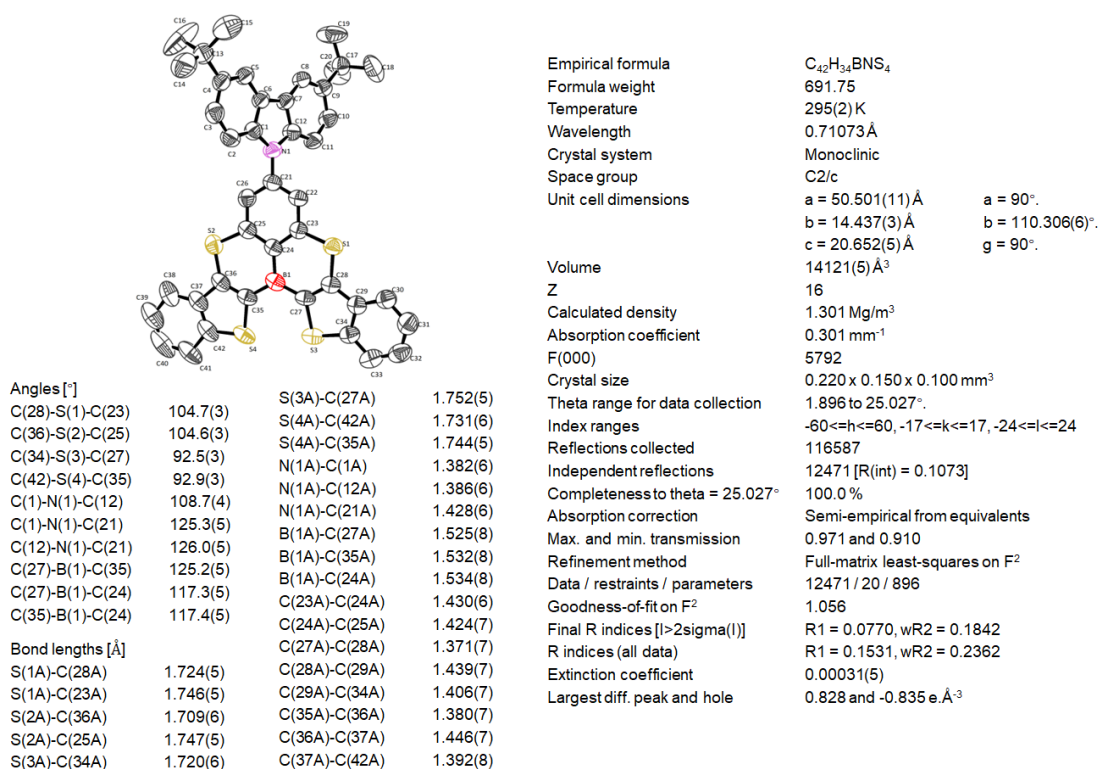

**Figure S3.** X-ray crystal structure and refinement information for  $\alpha$ -DThBSS-Cz (Thermal ellipsoids are set at 50% probability level).

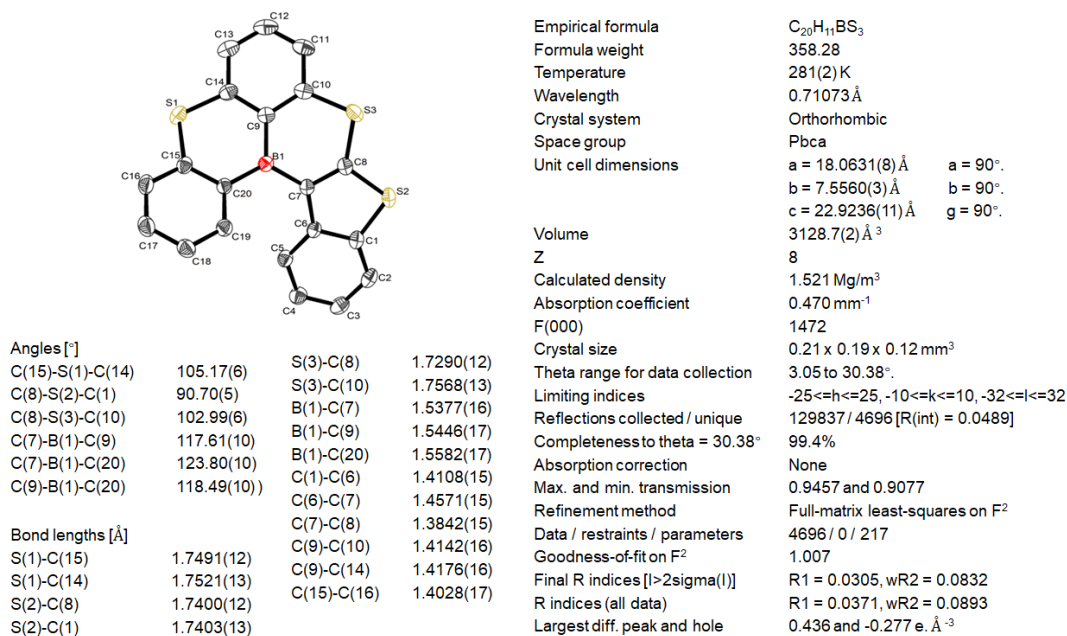

**Figure S4.** X-ray crystal structure and refinement information for  $\beta$ -ThBSS (Thermal ellipsoids are set at 50% probability level).

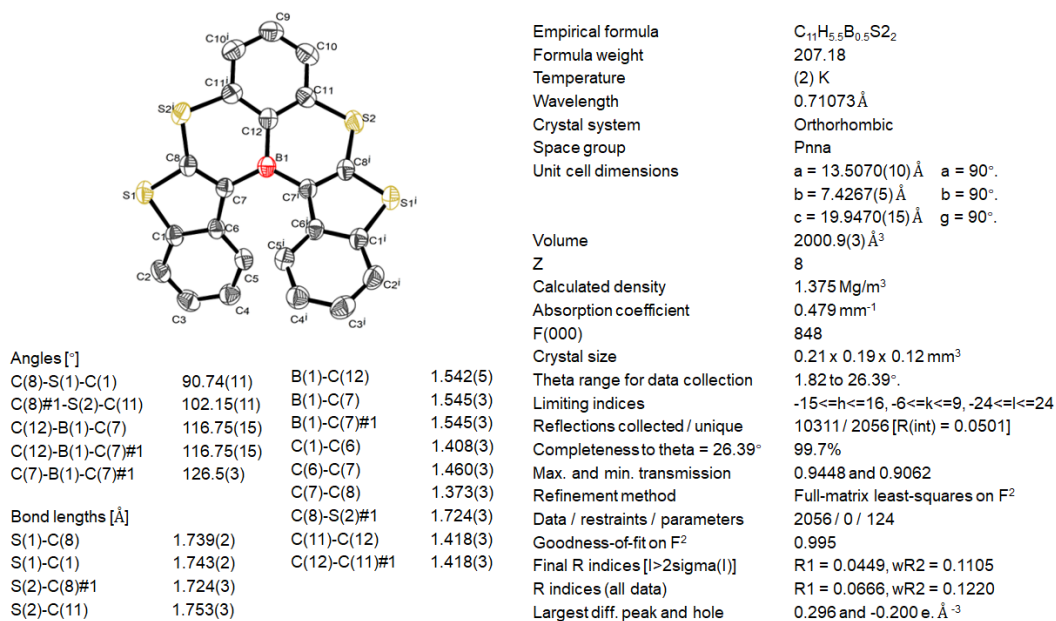

**Figure S5.** X-ray crystal structure and refinement information for  $\beta$ -DThBSS with symmetrical structure (Thermal ellipsoids are set at 50% probability level).

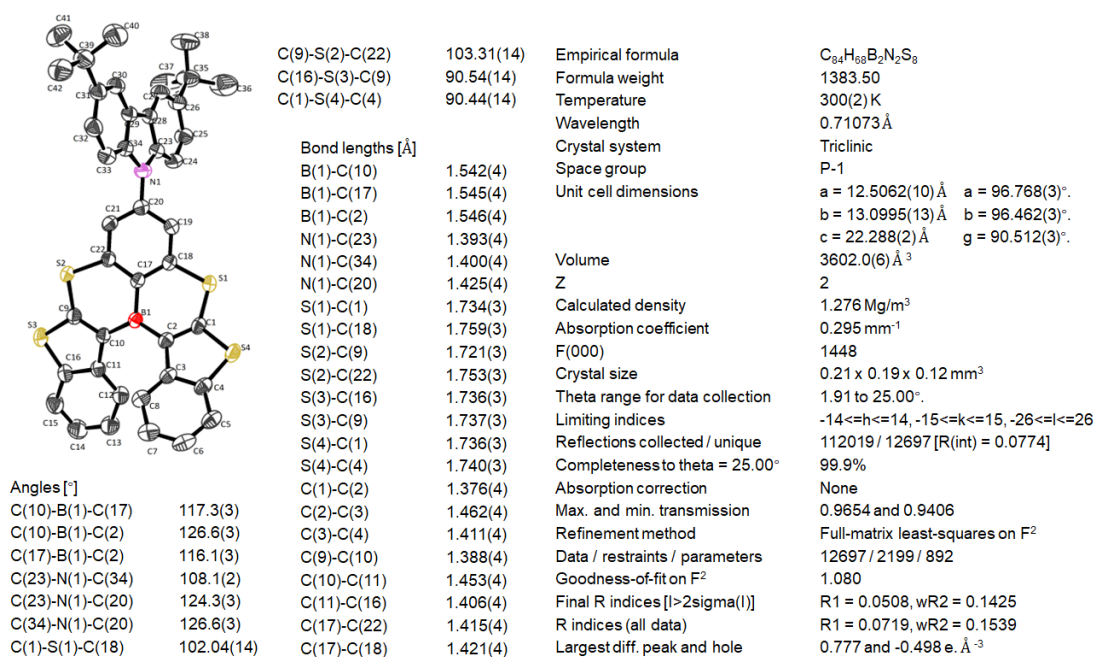

**Figure S6.** X-ray crystal structure and refinement information for  $\beta$ -DThBSS-Cz (Thermal ellipsoids are set at 50% probability level).



## Theoretical Calculations

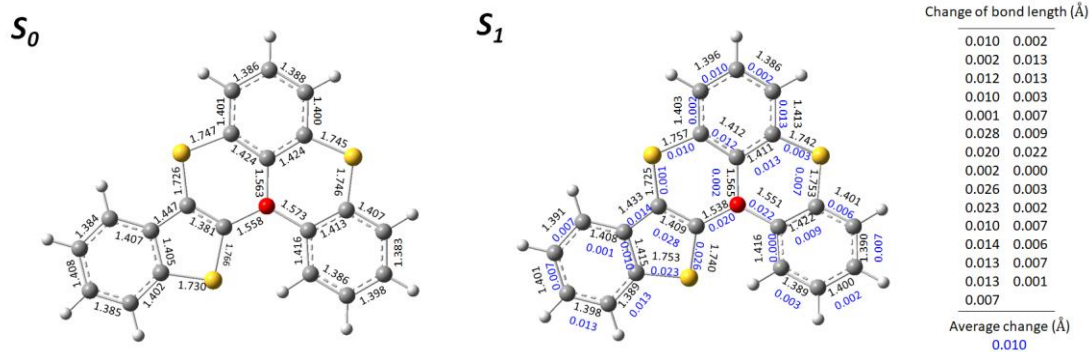

**Figure S7.** Bond lengths of optimized structures for  $S_0$  and  $S_1$  states of  $\alpha$ -ThBSS, with the change of bond length between  $S_0$  and  $S_1$  states shown in blue color.

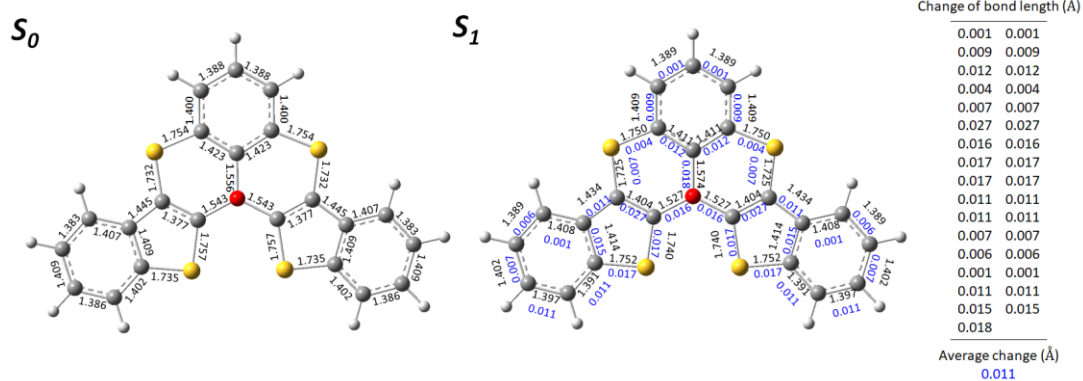

**Figure S8.** Bond lengths of optimized structures for  $S_0$  and  $S_1$  states of  $\alpha$ -DThBSS, with the change of bond length between  $S_0$  and  $S_1$  states shown in blue color.

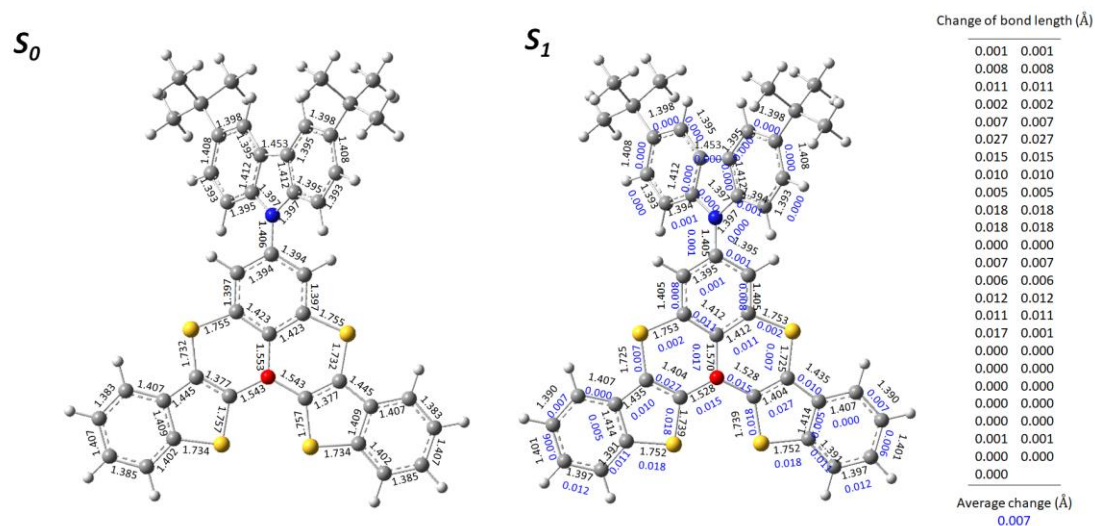

**Figure S9.** Bond lengths of optimized structures for  $S_0$  and  $S_1$  states of  $\alpha$ -DThBSS-Cz, with the change of bond length between  $S_0$  and  $S_1$  states shown in blue color.

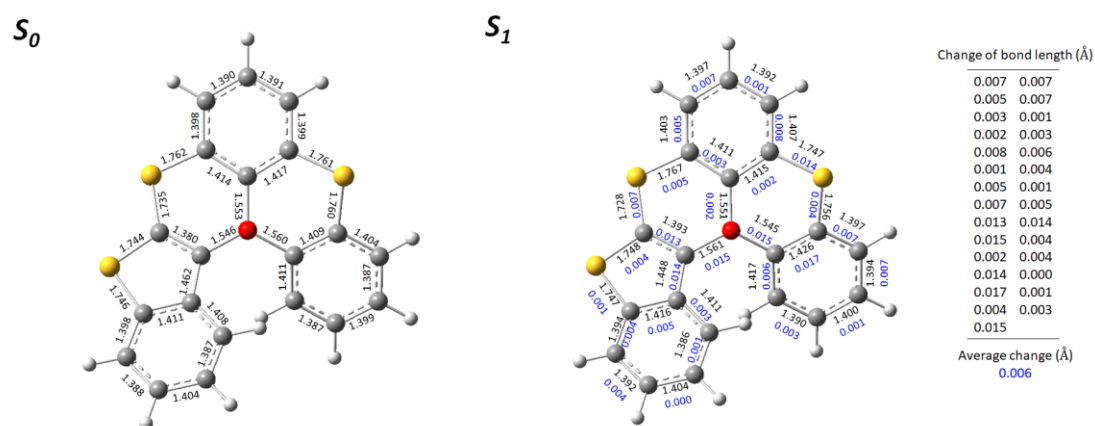

**Figure S10.** Bond lengths of optimized structures for  $S_0$  and  $S_1$  states of  $\beta$ -ThBSS, with the change of bond length between  $S_0$  and  $S_1$  states shown in blue color.

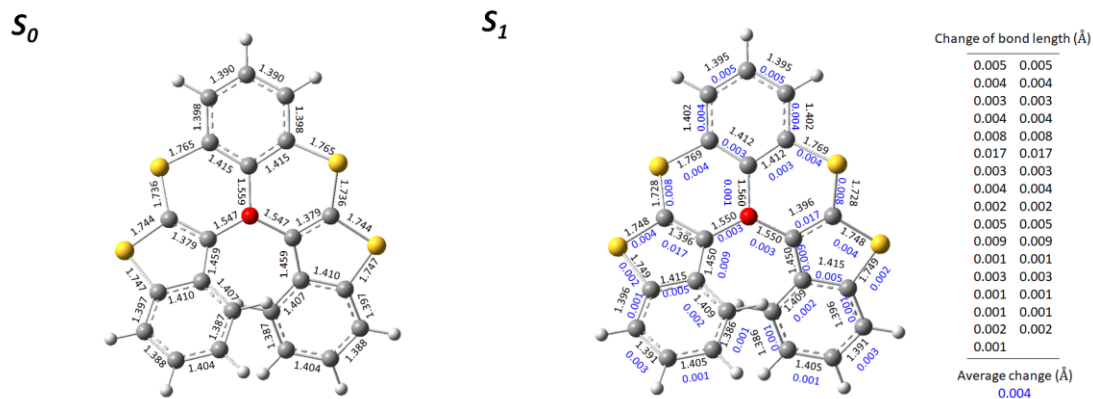

**Figure S11.** Bond lengths of optimized structures for  $S_0$  and  $S_1$  states of  $\beta$ -DThBSS, with the change of bond length between  $S_0$  and  $S_1$  states shown in blue color.

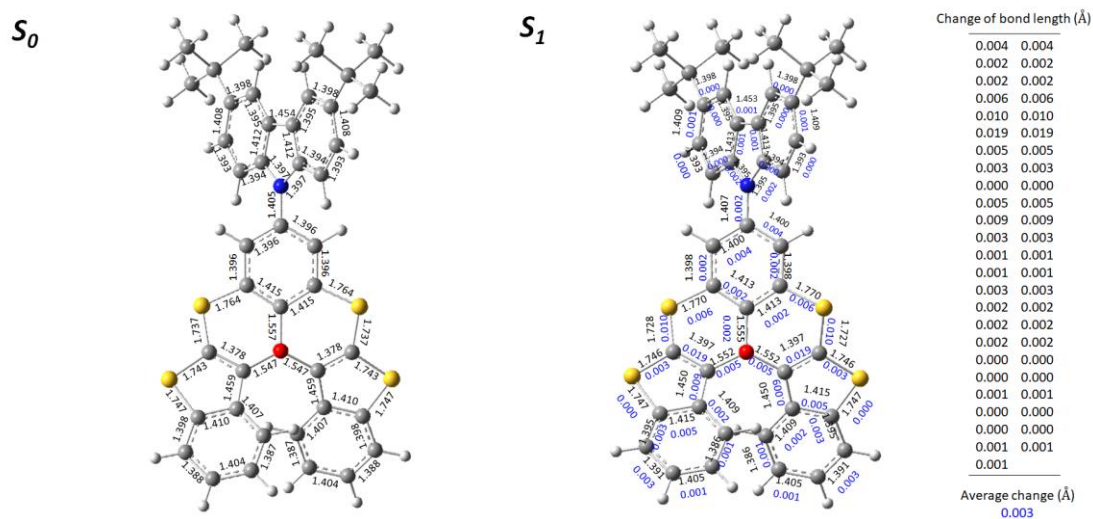

**Figure S12.** Bond lengths of optimized structures for  $S_0$  and  $S_1$  states of  $\beta$ -DThBSS-Cz, with the change of bond length between  $S_0$  and  $S_1$  states shown in blue color.

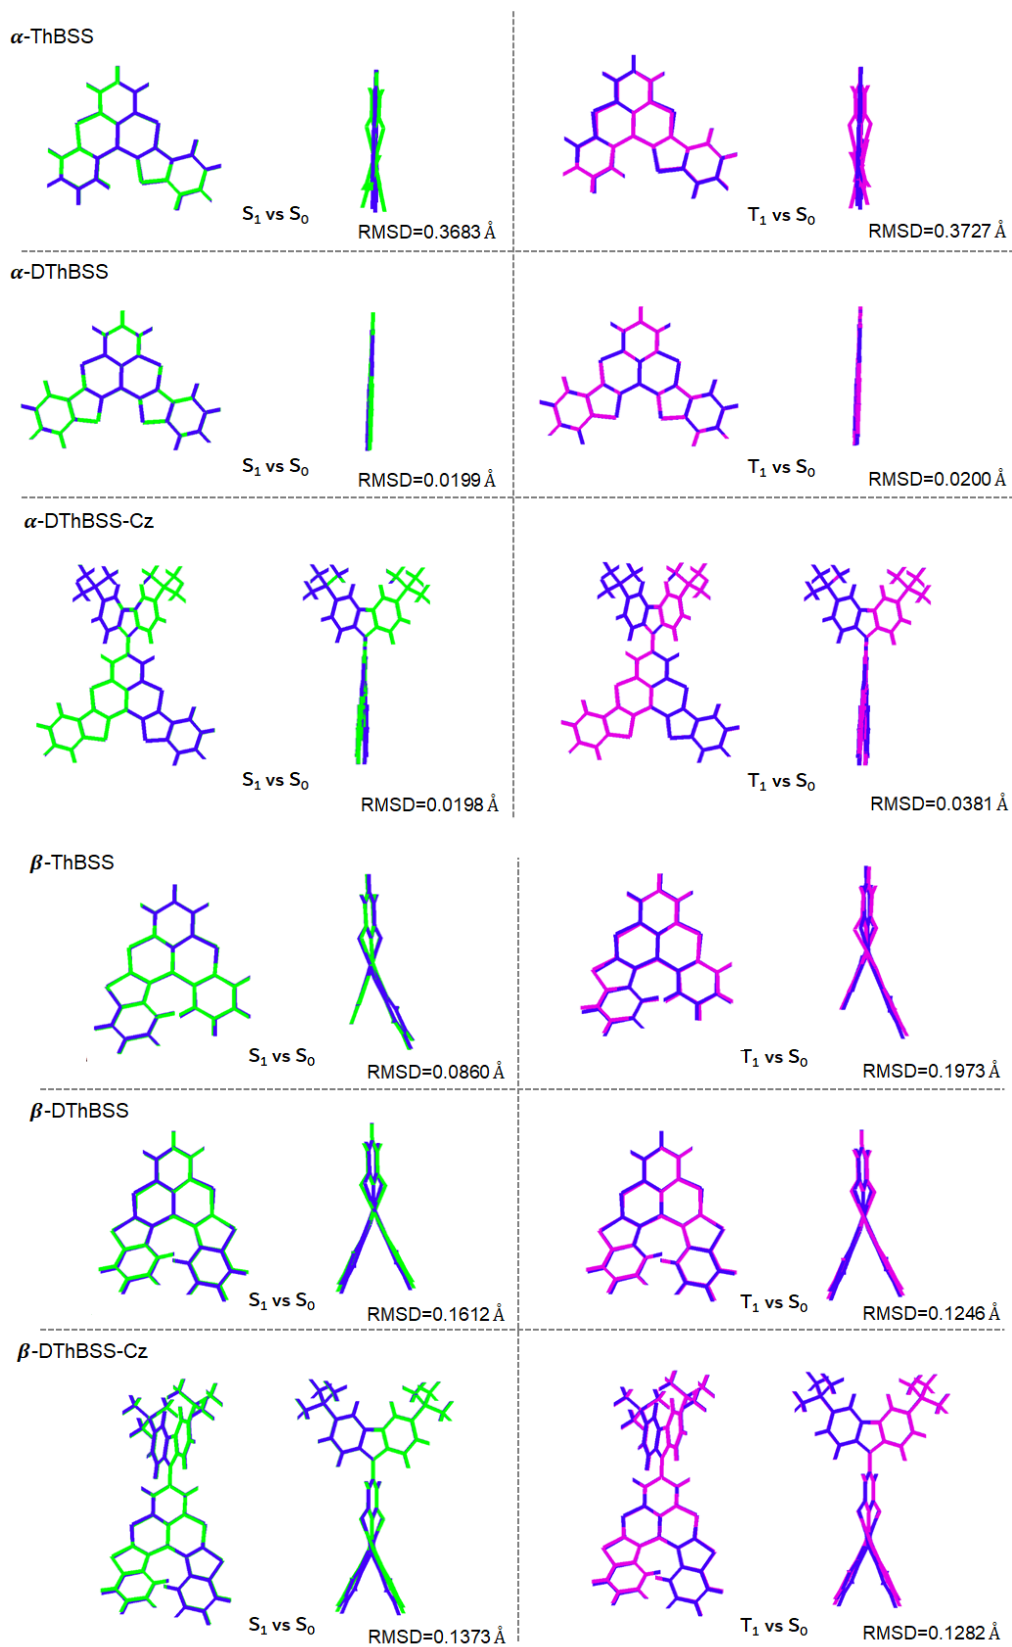

**Figure S13.** Excited-state molecular configuration and root mean square displacement (RMSD) between  $S_0$  and  $S_1/T_1$  state for the emitters.

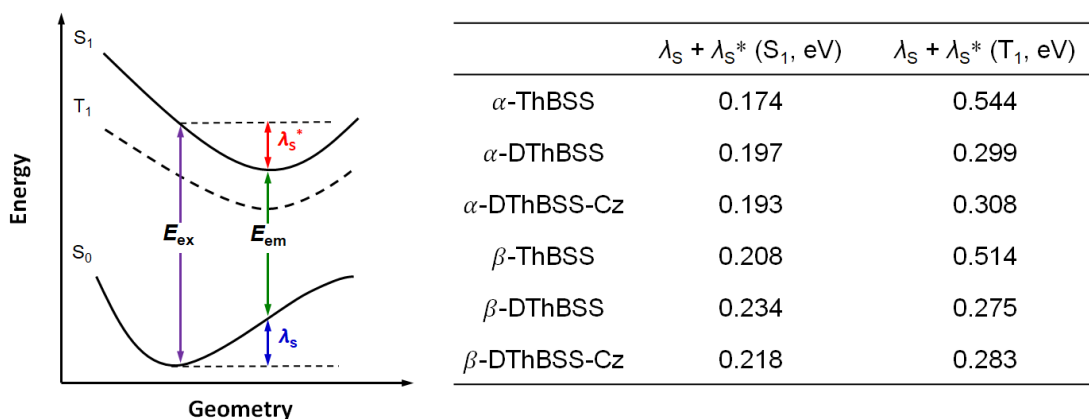

**Figure S14.** Reorganization energy ( $\lambda_S$  and  $\lambda_{S^*}$ ) for the emitters.

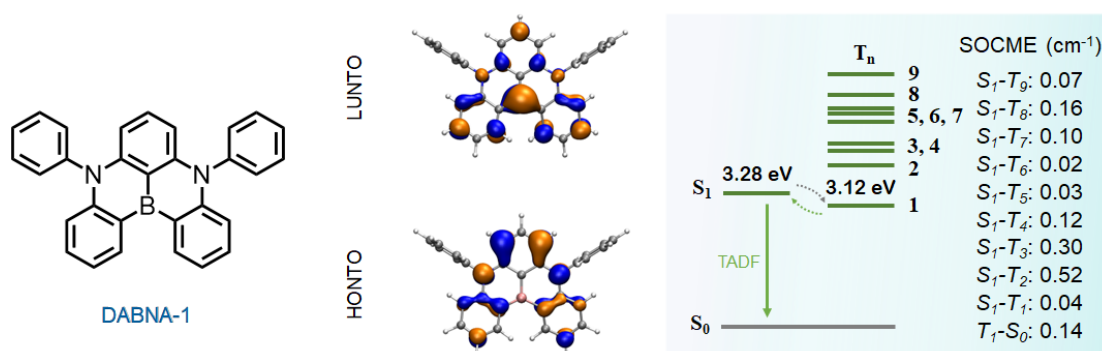

**Figure S15.** Nature transition orbitals (NTO) of  $S_1$  state, and SOC matrix element for a typical B, N-based MR-TADF emitter (DABNA-1) by TD-DFT calculation (M062X/def2SVP level).

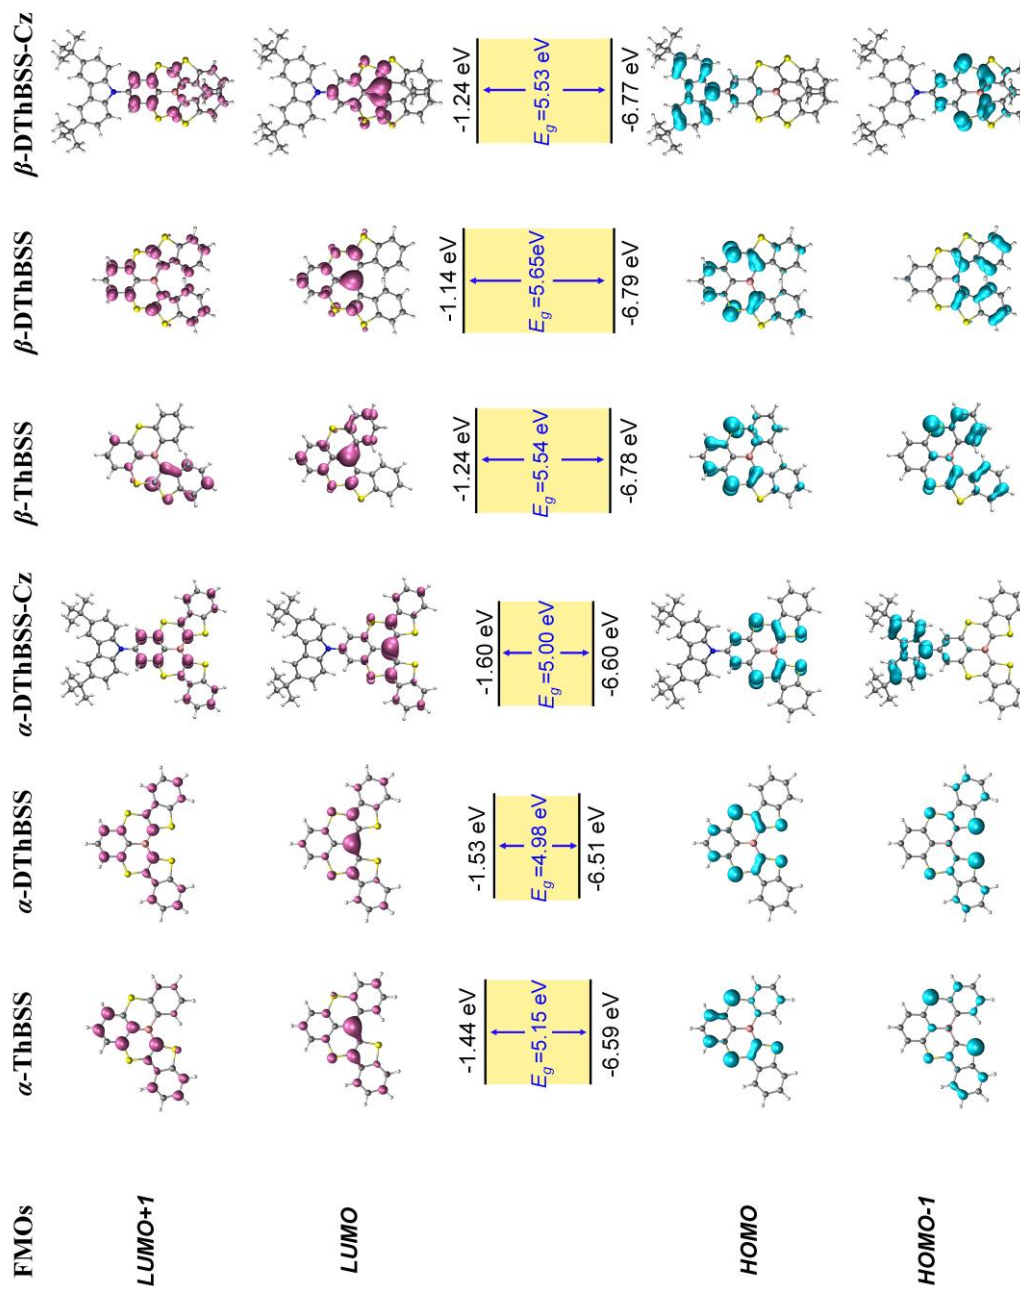

**Figure S16.** Frontier molecular orbitals (HOMOs and LUMOs) for the emitters at M062X/def2SVP level (note that for  $\beta$ -DThBSS-Cz, HOMO-1 orbital contributes most to  $S_0$ - $S_1$  transition).

**Table S1.** Summary of TD-DFT calculation (M062X/def2SVP level) results for the emitters.

| Compound            | State          | Excitation Energy [eV] | Oscillator Strength [f] | Main Configuration                                    |
|---------------------|----------------|------------------------|-------------------------|-------------------------------------------------------|
| $\alpha$ -ThBSS     | S <sub>1</sub> | 3.2935                 | 0.2089                  | H→L (0.9652)                                          |
|                     | T <sub>1</sub> | 2.5736                 |                         | H→L (0.8554), H-1→L (0.0449)                          |
| $\alpha$ -DThBSS    | S <sub>1</sub> | 3.1824                 | 0.2650                  | H→L (0.9685)                                          |
|                     | T <sub>1</sub> | 2.4150                 |                         | H→L (0.9011), H-1→L+1 (0.0283)                        |
| $\alpha$ -DThBSS-Cz | S <sub>1</sub> | 3.2139                 | 0.2537                  | H→L (0.9646)                                          |
|                     | T <sub>1</sub> | 2.4456                 |                         | H→L (0.8953), H-3→L+1 (0.0242)                        |
| $\beta$ -ThBSS      | S <sub>1</sub> | 3.5136                 | 0.1599                  | H→L (0.9568)                                          |
|                     | T <sub>1</sub> | 2.9169                 |                         | H→L (0.8744), H→L+1 (0.0233)                          |
| $\beta$ -DThBSS     | S <sub>1</sub> | 3.6024                 | 0.1633                  | H→L (0.9489)                                          |
|                     | T <sub>1</sub> | 2.9060                 |                         | H→L (0.8643), H-1→L+1 (0.0298),<br>H→L+2 (0.0233)     |
| $\beta$ -DThBSS-Cz  | S <sub>1</sub> | 3.6151                 | 0.1475                  | H-1→L (0.9345)                                        |
|                     | T <sub>1</sub> | 2.9300                 |                         | H-1→L (0.8373), H-1→L+2<br>(0.0436), H-3→L+1 (0.0279) |

## Electrochemical Measurements

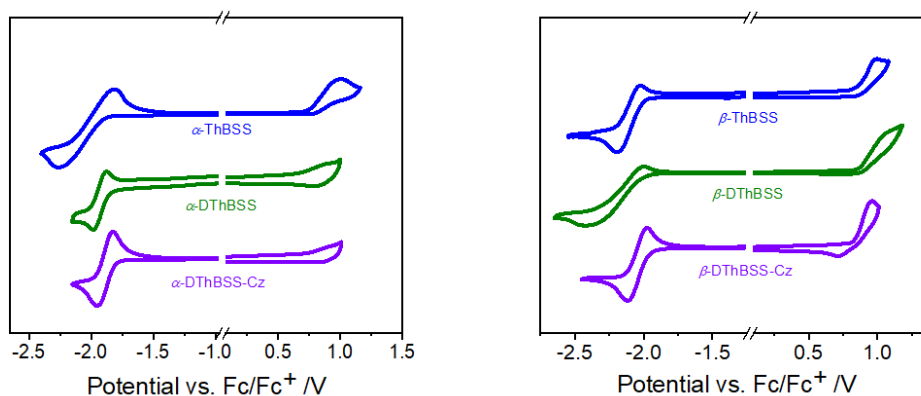

**Figure S17.** Cyclic voltammetry (CV) characteristics for the emitters. The oxidation and reduction curves were recorded in dichloromethane (DCM) and tetrahydrofuran (THF) respectively, using ferrocene as the reference and *n*-Bu<sub>4</sub>NClO<sub>4</sub> as the supporting electrolyte.

**Table S2.** Summary of electrochemical parameters for the emitters.

| Emitters            | $E_{\text{onset}}^{\text{ox}}$<br>[V] | $E_{\text{onset}}^{\text{red}}$<br>[V] | HOMO<br>[eV] | LUMO<br>[eV] |
|---------------------|---------------------------------------|----------------------------------------|--------------|--------------|
| $\alpha$ -ThBSS     | 0.76                                  | -1.86                                  | -5.56        | -2.94        |
| $\alpha$ -DThBSS    | 0.68                                  | -1.79                                  | -5.48        | -3.01        |
| $\alpha$ -DThBSS-Cz | 0.73                                  | -1.76                                  | -5.53        | -3.04        |
| $\beta$ -ThBSS      | 0.82                                  | -1.97                                  | -5.62        | -2.83        |
| $\beta$ -DThBSS     | 0.84                                  | -2.00                                  | -5.64        | -2.80        |
| $\beta$ -DThBSS-Cz  | 0.81                                  | -1.98                                  | -5.61        | -2.82        |

The highest occupied molecular orbital (HOMO) and the lowest unoccupied molecular orbital (LUMO) energy levels of the emitters were calculated according to equations of  $E_{\text{HOMO}}/E_{\text{LUMO}} = -(4.80 + E_{\text{onset}}^{\text{ox}}/E_{\text{onset}}^{\text{red}})$ , in which  $E_{\text{onset}}^{\text{ox}}$  and  $E_{\text{onset}}^{\text{red}}$  are the onset of oxidation and reduction potentials respectively.



## Thermal Properties

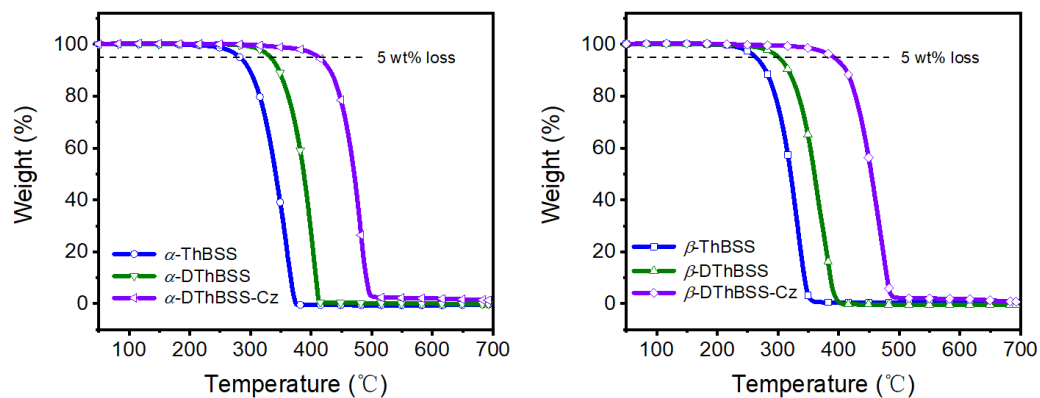

Figure S18. Thermogravimetric analysis (TGA) curves for the emitters.

## Photophysical Properties

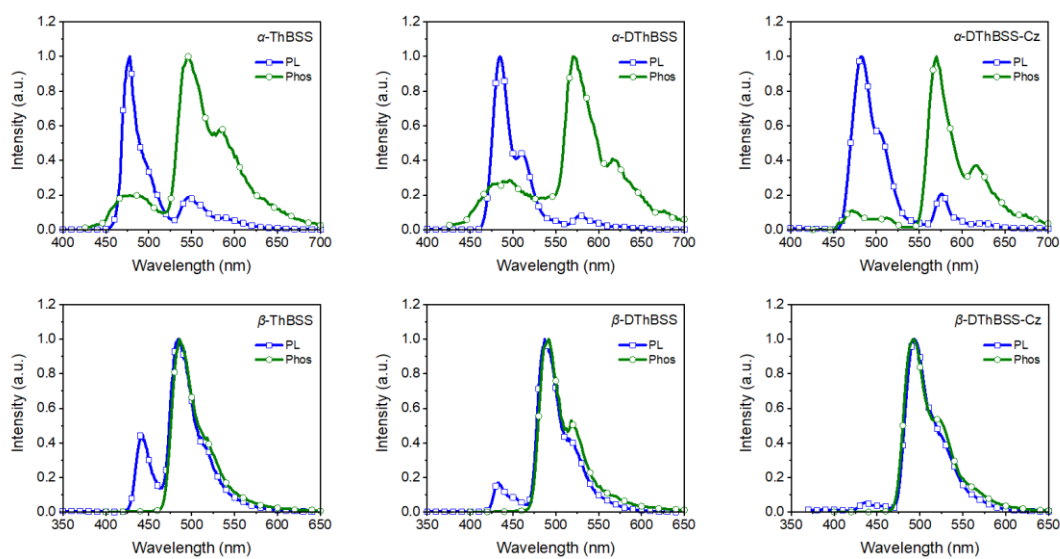

Figure S19. Fluorescence and phosphorescence (delay time: 10 ms) spectra in toluene at 77 K.

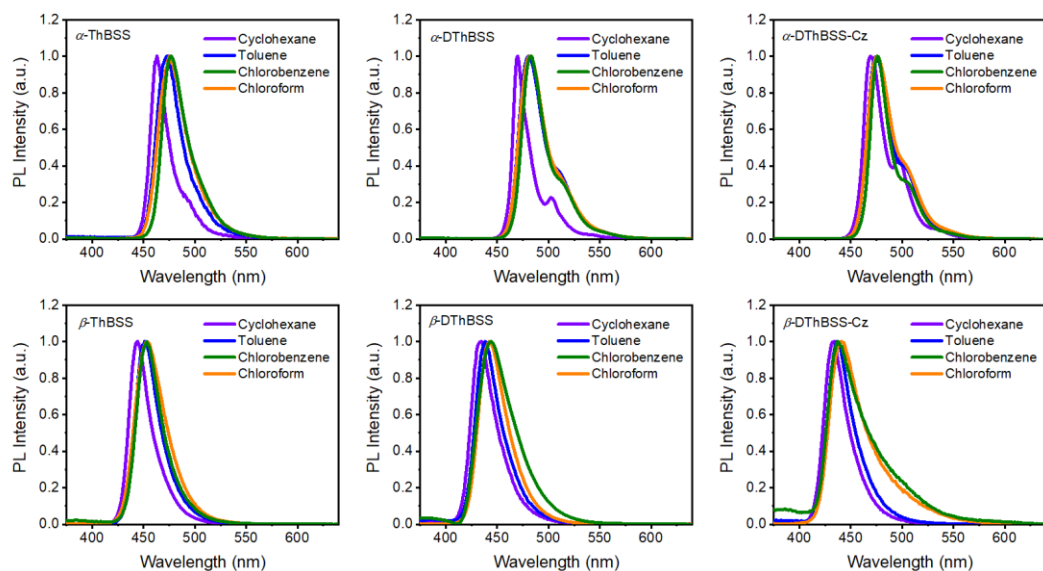

**Figure S20.** PL spectra in solvents with different polarity ( $10^{-5}$  mol L $^{-1}$ ).

**Table S3.** Summary of photophysical properties for the emitters in toluene ( $10^{-5}$  mol L $^{-1}$ ).

| Emitters            | $\lambda_{\text{abs}}^a$<br>[nm] | $\lambda_{\text{em}}^b$<br>[nm] | $\lambda_{\text{ph}}^c$<br>[nm] | Stokes shift <sup>d</sup><br>[nm] | FWHM <sup>e</sup><br>[nm] |
|---------------------|----------------------------------|---------------------------------|---------------------------------|-----------------------------------|---------------------------|
| $\alpha$ -ThBSS     | 318, 360, 451                    | 473                             | 546                             | 22                                | 28                        |
| $\alpha$ -DThBSS    | 310, 335, 360, 465               | 481                             | 570                             | 16                                | 27                        |
| $\alpha$ -DThBSS-Cz | 310, 340, 360, 385, 459          | 475                             | 569                             | 16                                | 26                        |
| $\beta$ -ThBSS      | 312, 427                         | 451                             | 486                             | 24                                | 27                        |
| $\beta$ -DThBSS     | 312, 415                         | 438                             | 492                             | 23                                | 27                        |
| $\beta$ -DThBSS-Cz  | 314, 332, 380, 413               | 437                             | 491                             | 24                                | 26                        |

<sup>a</sup> Absorption peaks; <sup>b</sup> Emission peak; <sup>c</sup> Phosphorescence peak (77 K, delay time: 10 ms); <sup>d</sup> Stokes shift ( $\lambda_{\text{em}} - \lambda_{\text{abs}}$ ); <sup>e</sup> Full width at half-maximum for PL spectra.

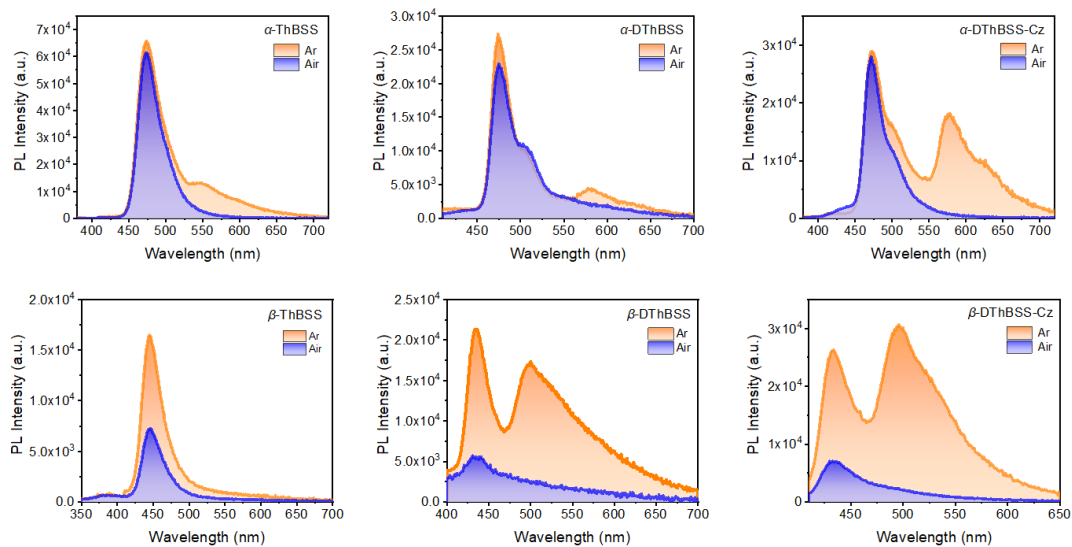

**Figure S21.** Steady-state PL spectra for the emitters in PMMA matrix (1 wt%) under argon and air atmosphere.

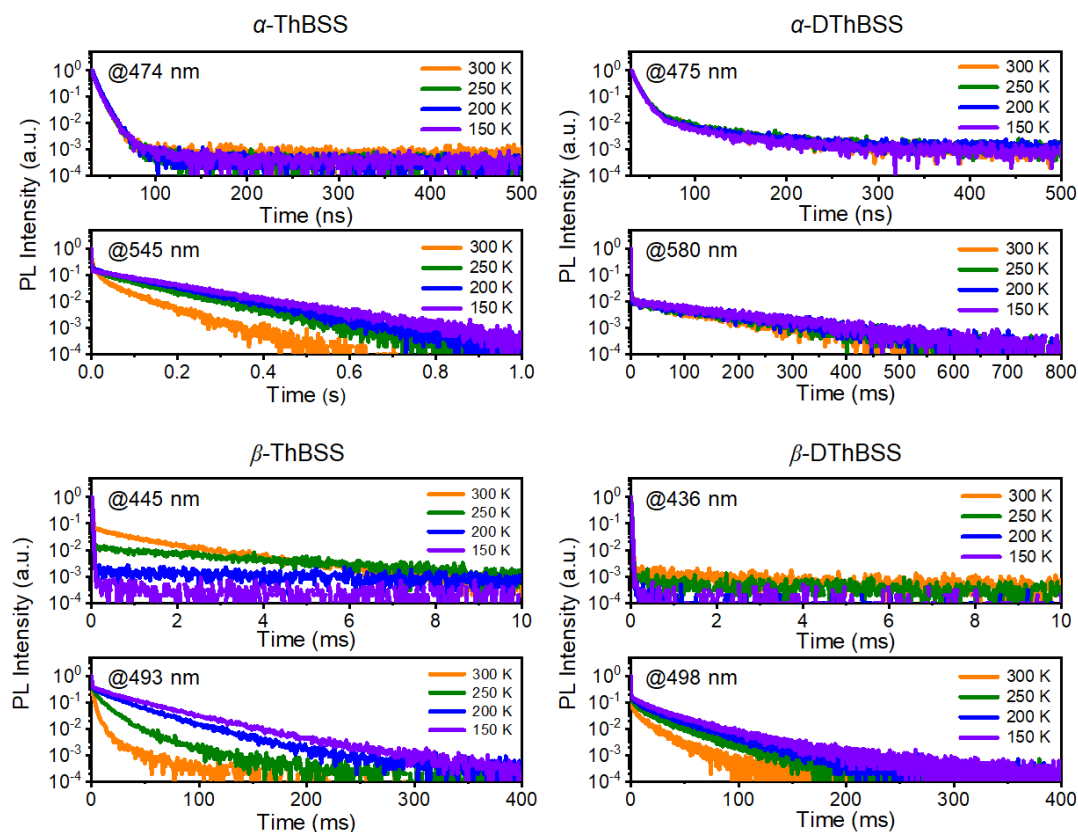

**Figure S22.** Temperature-dependent transient PL decay characteristics for the emitters in PMMA matrix (1 wt%).

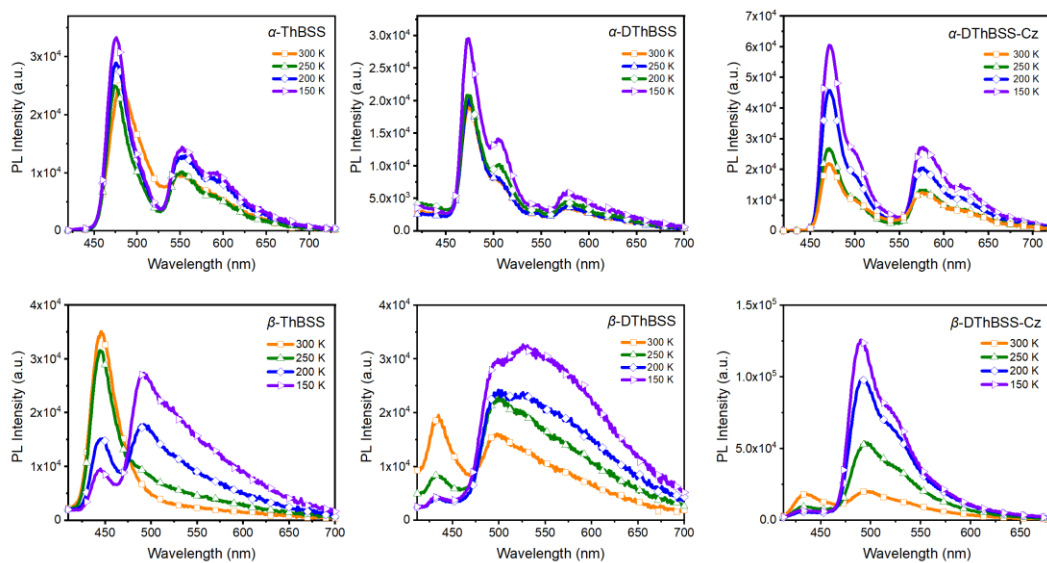

**Figure 23.** Temperature-dependent PL spectra for the emitters in doped PMMA films (1 wt%).

**Table S4.** Summary of kinetic parameters for the emitters in doped PMMA films (1 wt%).

| Compounds           | $k_r^F$<br>[ $10^8 \text{ s}^{-1}$ ] | $k_{ISC}$<br>[ $10^8 \text{ s}^{-1}$ ] | $k_{RISC}$<br>[ $10^3 \text{ s}^{-1}$ ] | $k_r^P$<br>[ $10^1 \text{ s}^{-1}$ ] | $k_{nr}^P$<br>[ $10^1 \text{ s}^{-1}$ ] |
|---------------------|--------------------------------------|----------------------------------------|-----------------------------------------|--------------------------------------|-----------------------------------------|
| $\alpha$ -ThBSS     | 1.19                                 | 0.50                                   | --                                      | 0.54                                 | 1.56                                    |
| $\alpha$ -DThBSS    | 0.92                                 | 0.25                                   | --                                      | 0.12                                 | 0.76                                    |
| $\alpha$ -DThBSS-Cz | 1.15                                 | 0.92                                   | --                                      | 0.26                                 | 0.57                                    |
| $\beta$ -ThBSS      | 0.61                                 | 7.33                                   | 5.17                                    | 1.56                                 | 13.18                                   |
| $\beta$ -DThBSS     | 0.22                                 | 2.43                                   | 0.44                                    | 2.51                                 | 10.84                                   |
| $\beta$ -DThBSS-Cz  | 0.22                                 | 6.36                                   | 0.48                                    | 1.76                                 | 6.22                                    |

$k_r^F$ : radiative decay rate constant from  $S_1$ ;  $k_r^P$  and  $k_{nr}^P$ : radiative and non-radiative decay rate constant from  $T_1$ ;  $k_{ISC}$ : intersystem crossing rate constant from  $S_1$  to  $T_1$ ;  $k_{RISC}$ : reverse intersystem crossing rate constant from  $T_1$  to  $S_1$ .

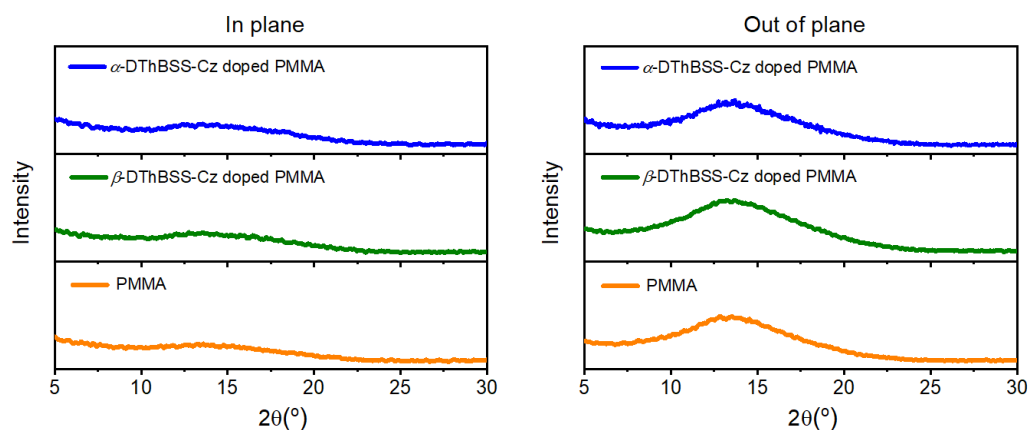

**Figure S24.** X-Ray diffraction (XRD) pattern for  $\alpha$ -DThBSS-Cz and  $\beta$ -DThBSS-Cz doped PMMA films (1 wt% doping concentration) as well as pure PMMA film.

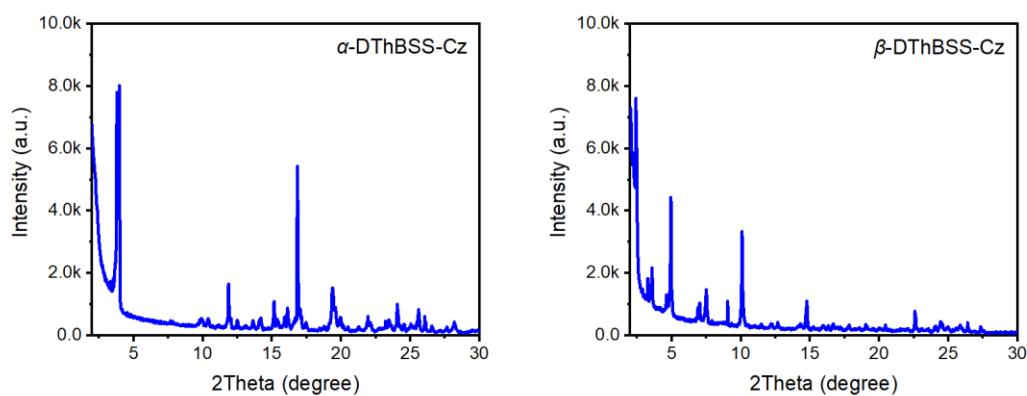

**Figure 25.** XRD pattern for  $\alpha$ -DThBSS-Cz and  $\beta$ -DThBSS-Cz powders.

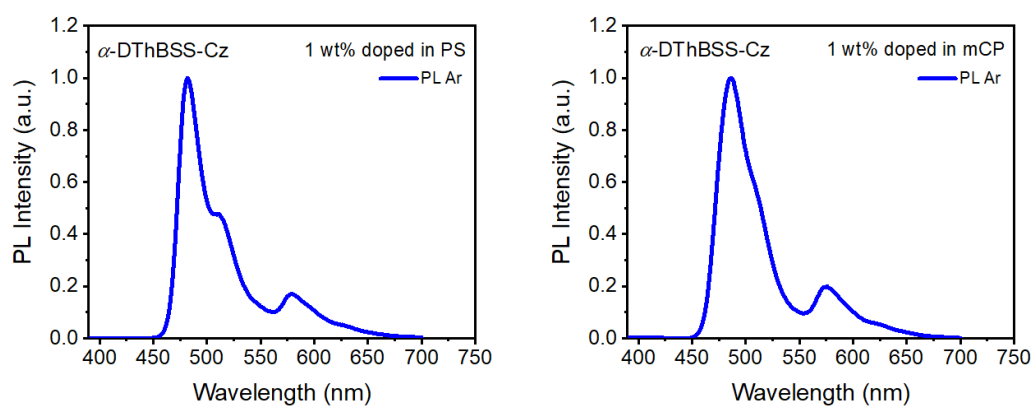

**Figure S26.** Steady-state PL spectra for  $\alpha$ -DThBSS-Cz doped in polystyrene (PS) and 1,3-bis(carbazol-9-yl)benzene (mCP) at room temperature.

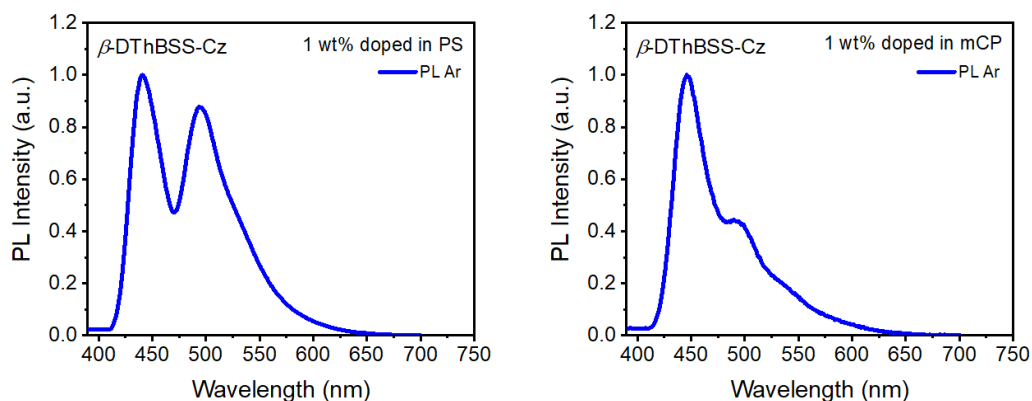

**Figure S27.** Steady-state PL spectra for  $\beta$ -DThBSS-Cz doped in PS and mCP at room temperature.

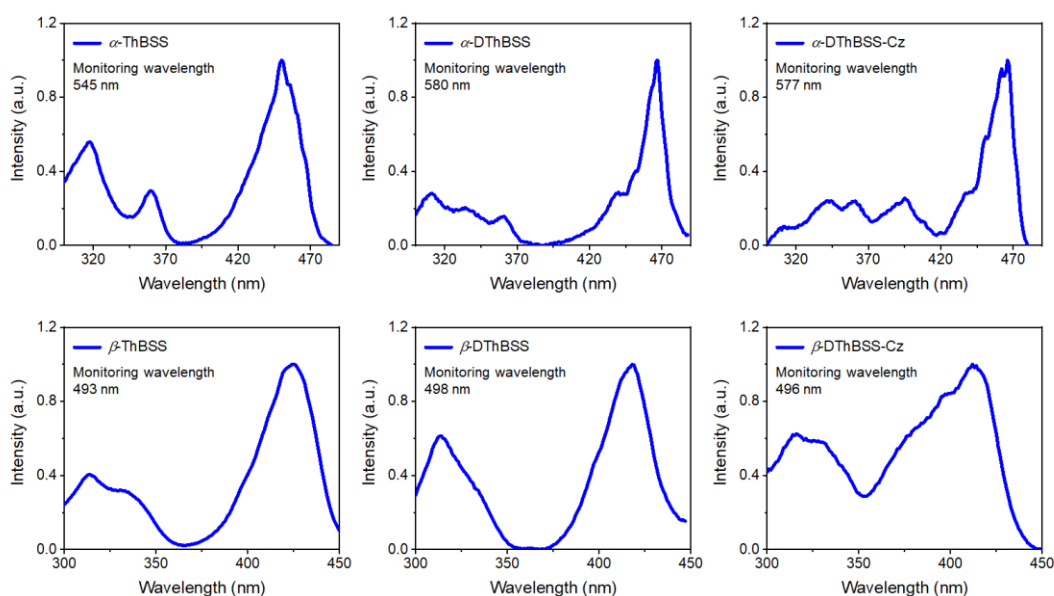

**Figure S28.** Excitation spectra for the emitters in doped films (1 wt% in PMMA). Note that the multi-resonance molecules exhibit restricted excited-state structure relaxation owing to their non-bonding molecular orbitals as well as the rigid and planar molecular skeleton, which indicates that the nuclear displacement from excited state to ground state can be greatly reduced, leading to small Stokes shift of 16-24 nm for resultant emitters. Such small Stokes-shift values mean that the absorption bands are very close to emission bands, making the emitters with blue emissions can be excited by visible light at 400-450 nm.

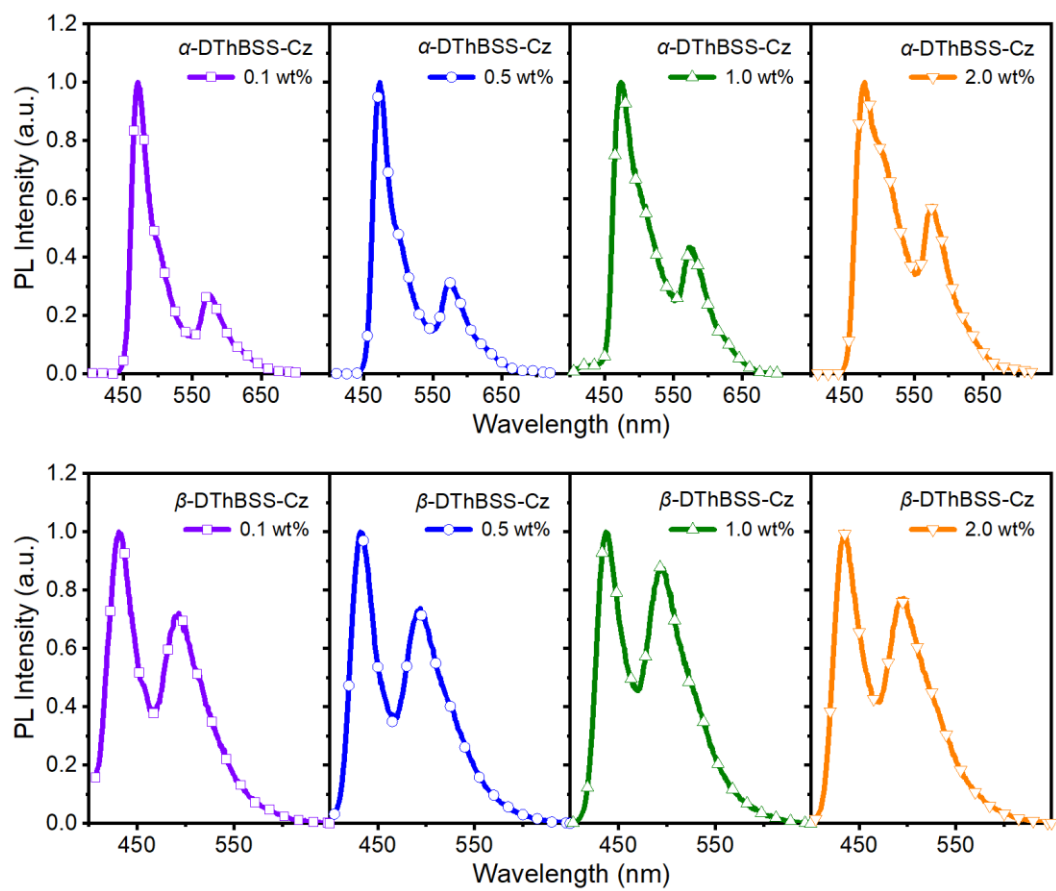

**Figure 29.** Steady-state PL spectra of  $\alpha$ -DThBSS-Cz and  $\beta$ -DThBSS-Cz doped in PMMA films with different concentrations.

## References

- 1 T. Lu and F. Chen, *J Comput Chem*, 2012, **33**, 580.
- 2 M. Kallay, P. R. Nagy, D. Mester, Z. Rolik, G. Samu, J. Csontos, J. Csoka, P. B. Szabo, L. Gyevi-Nagy, B. Hegely, I. Ladjanszki, L. Szegedy, B. Ladoczki, K. Petrov, M. Farkas, P. D. Mezei and A. Ganyecz, *J Chem Phys*, 2020, **152**, 074107.
- 3 A. Pershin, D. Hall, V. Lemaire, J. C. Sancho-Garcia, L. Muccioli, E. Zysman-Colman, D. Beljonne and Y. Olivier, *Nat Commun*, 2019, **10**, 597.
- 4 S. Tian, H. Ma, X. Wang, A. Lv, H. Shi, Y. Geng, J. Li, F. Liang, Z. M. Su, Z. An and W. Huang, *Angew. Chem. Int. Ed*, 2019, **58**, 6645.
- 5 Y. Tsuchiya, S. Diesing, F. Bencheikh, Y. Wada, P. L. Dos Santos, H. Kaji, E. Zysman-Colman, I. D. W. Samuel and C. Adachi, *J Phys Chem A*, 2021, **125**, 8074.



## NMR Spectra

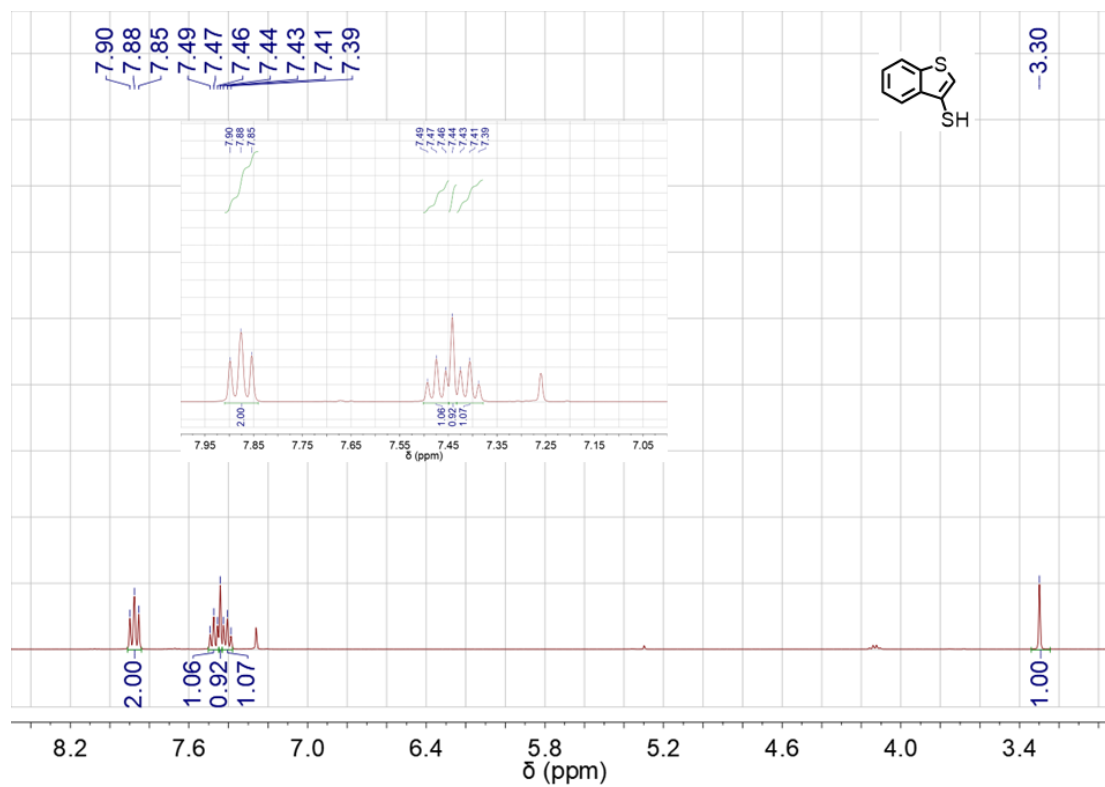

**Figure S30.**  $^1\text{H}$  NMR spectrum of **2**.

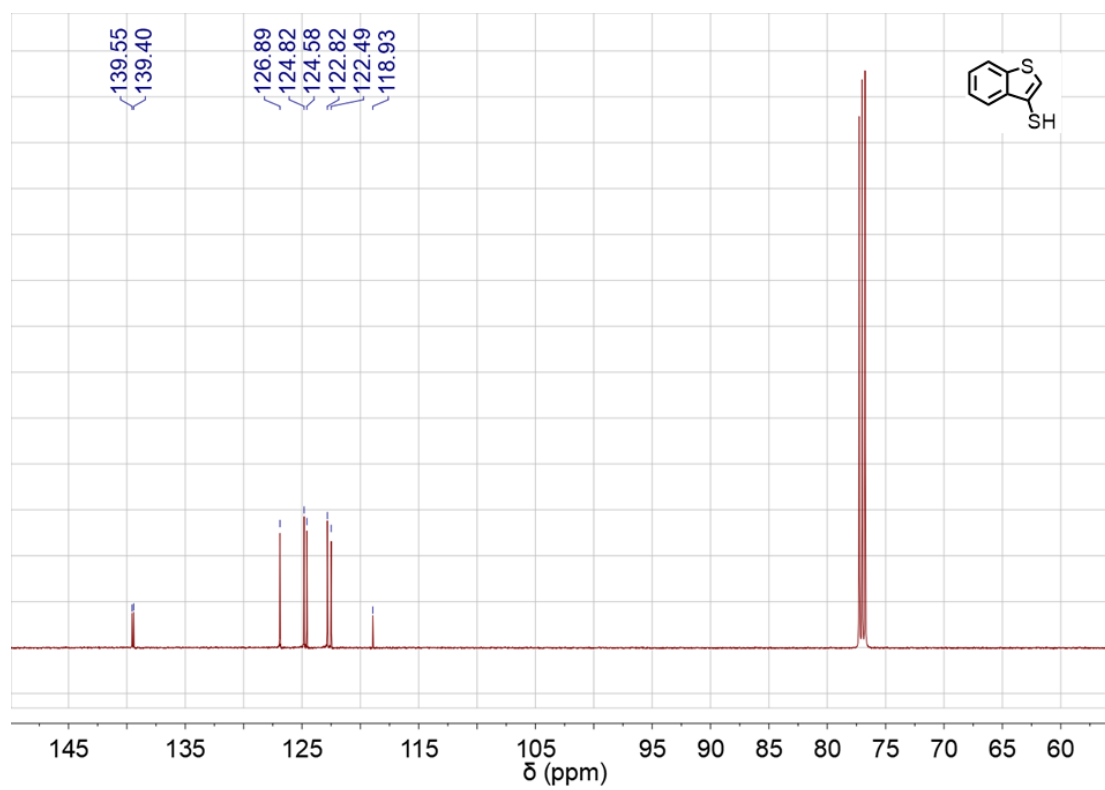

**Figure S31.**  $^{13}\text{C}$  NMR spectrum of **2**.

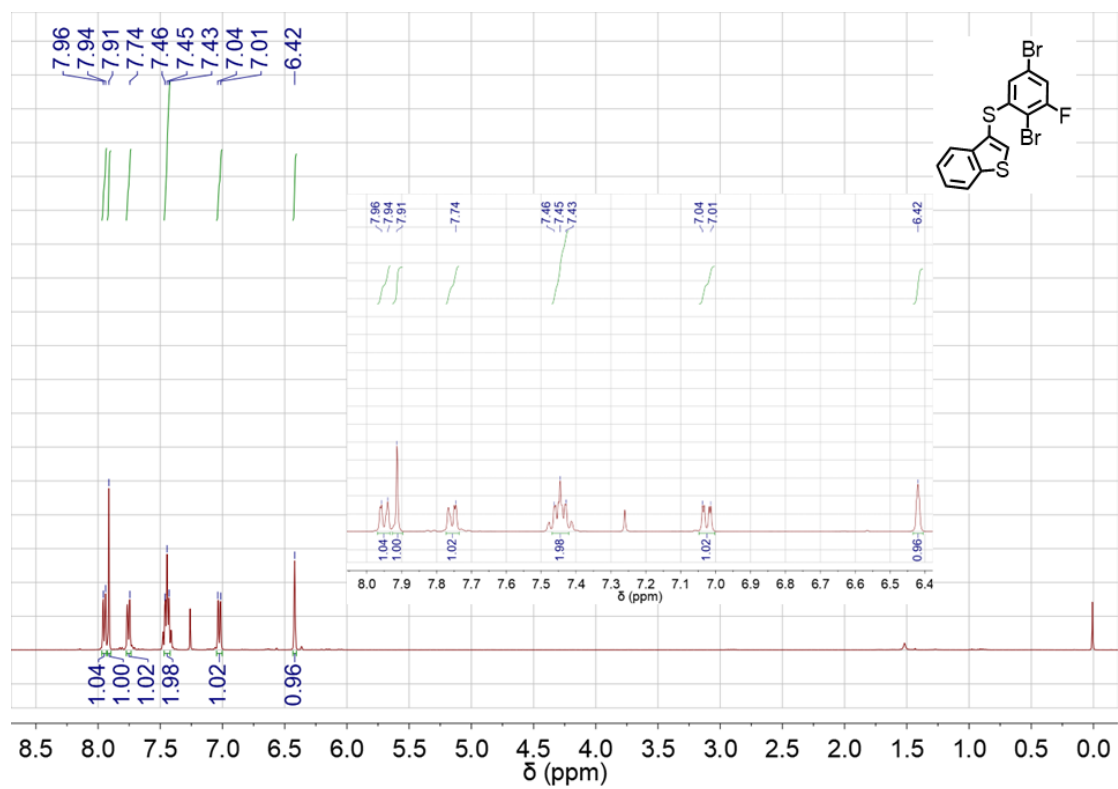

**Figure S32.** <sup>1</sup>H NMR spectrum of **3**.

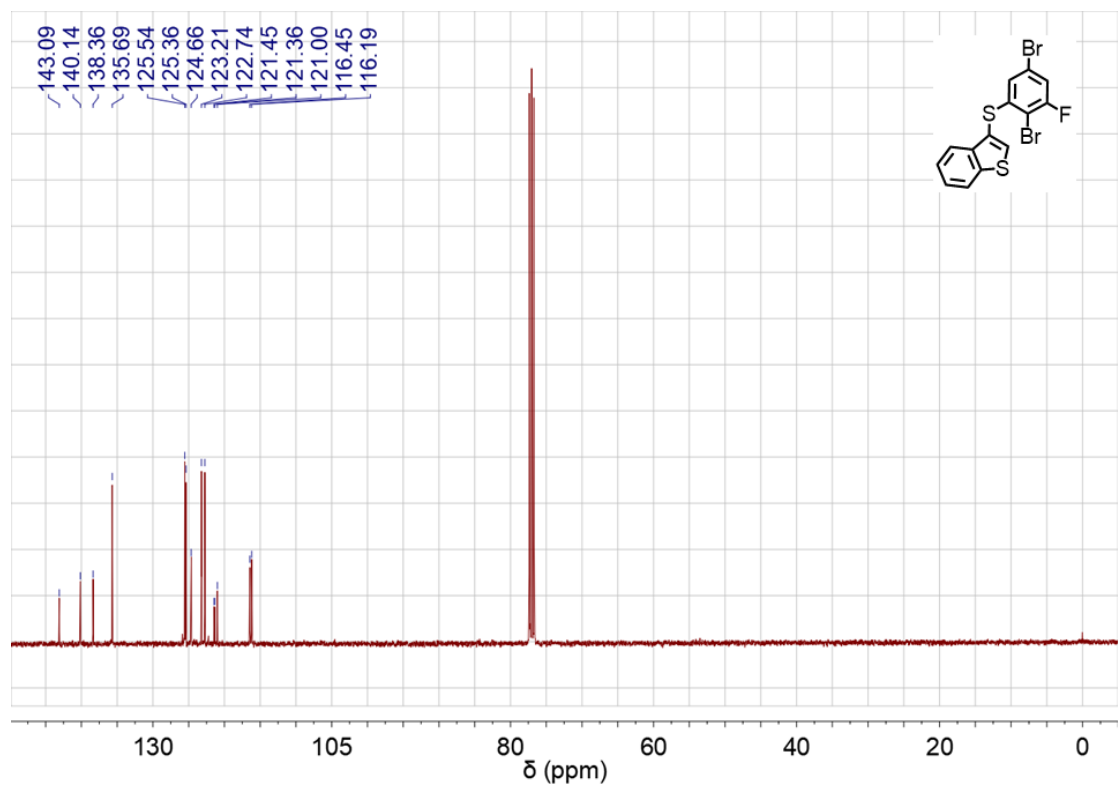

**Figure S33.** <sup>13</sup>C NMR spectrum of **3**.

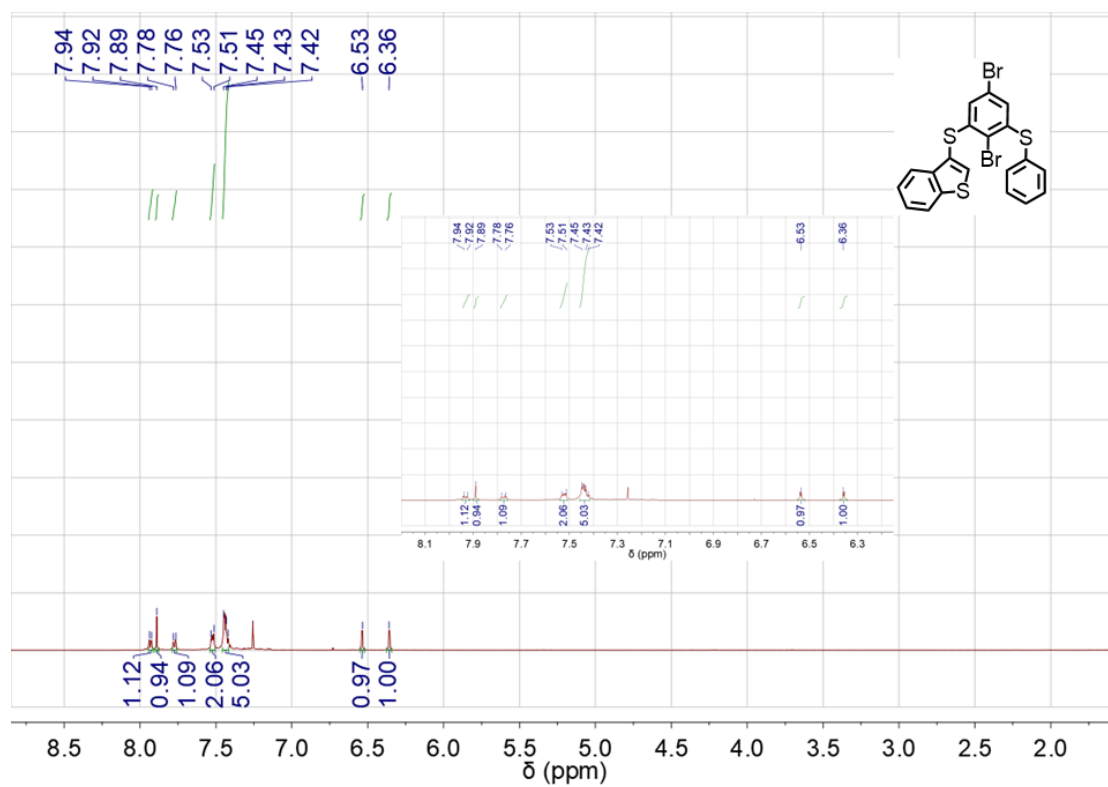

**Figure S34.**  $^1\text{H}$  NMR spectrum of **4**.

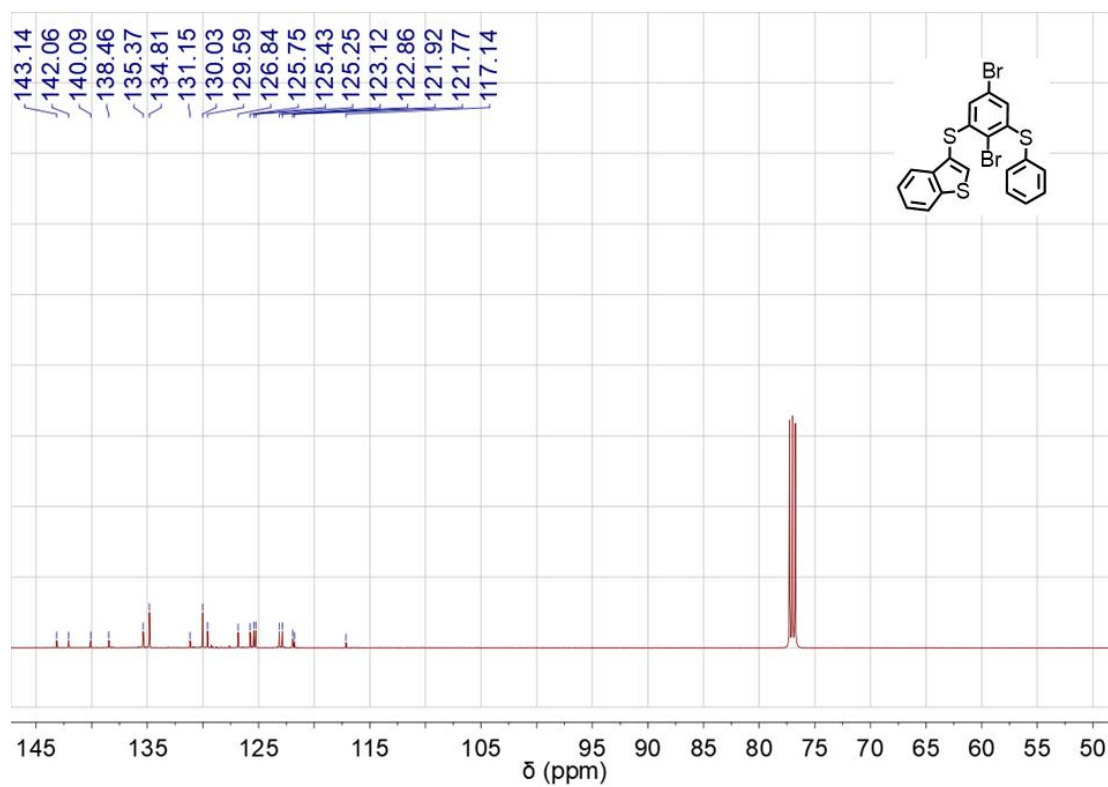

**Figure S35.**  $^{13}\text{C}$  NMR spectrum of **4**.

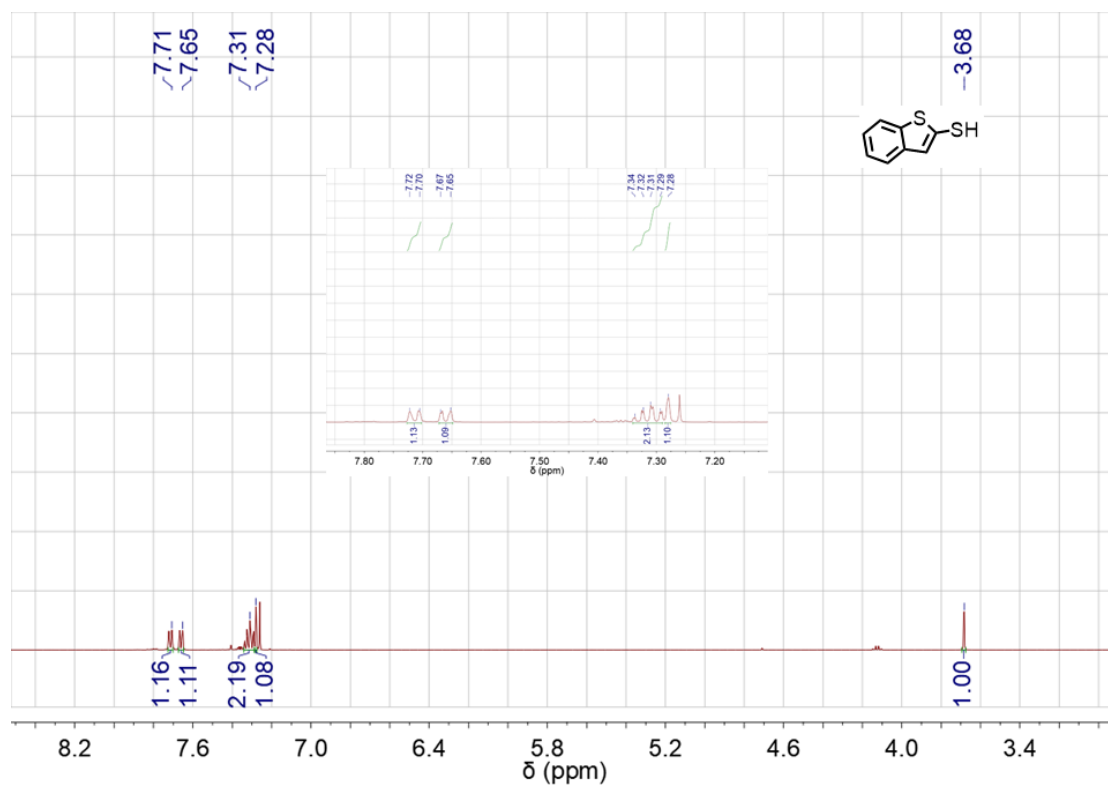

**Figure S36.**  $^1\text{H}$  NMR spectrum of **6**.

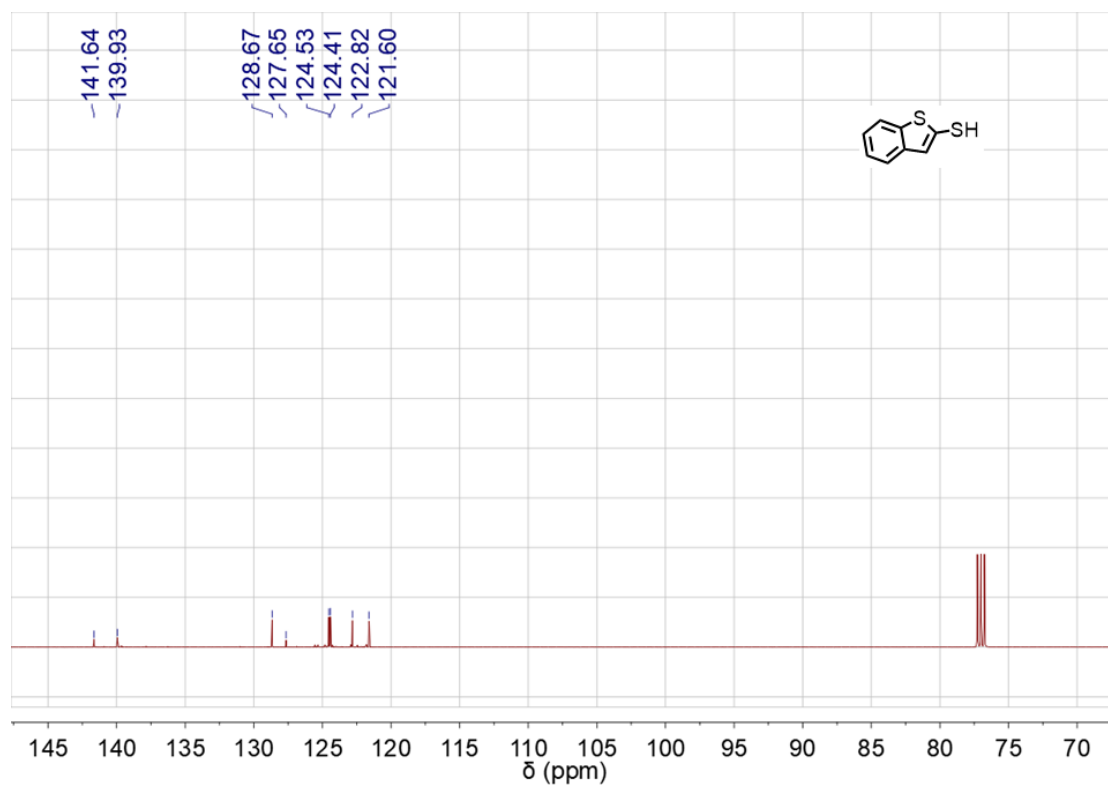

**Figure S37.**  $^{13}\text{C}$  NMR spectrum of **6**.

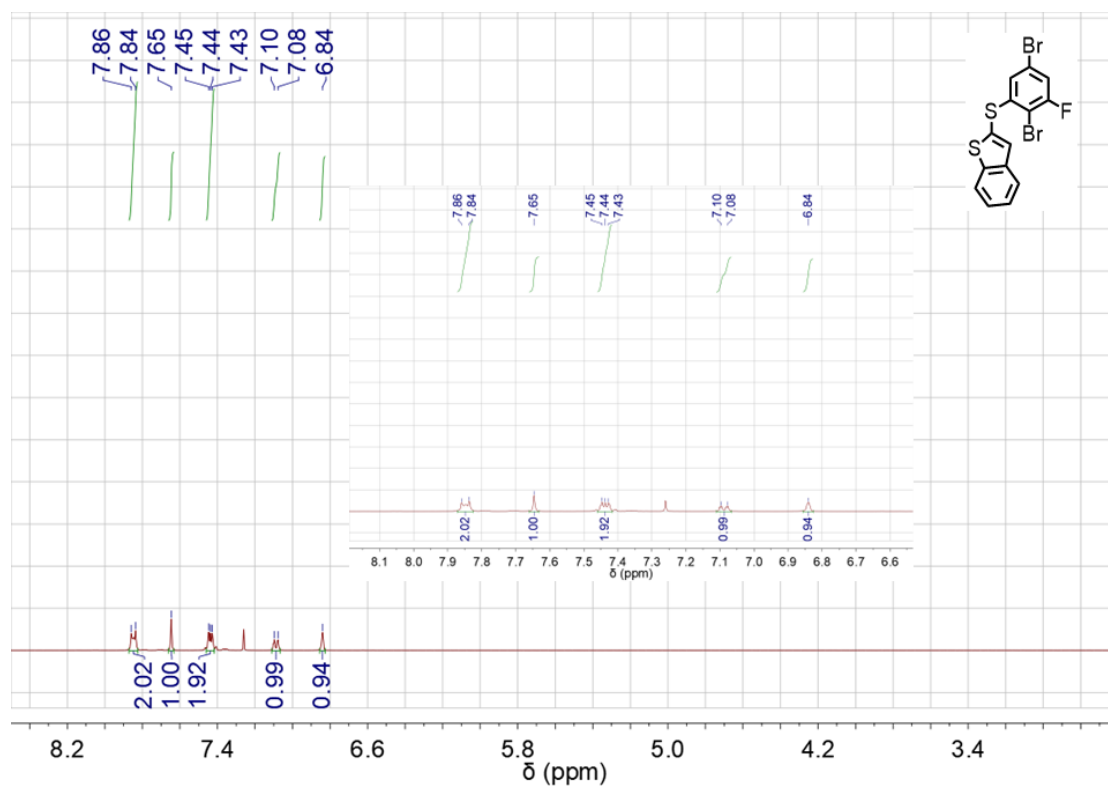

**Figure S38.**  $^1\text{H}$  NMR spectrum of **7**.

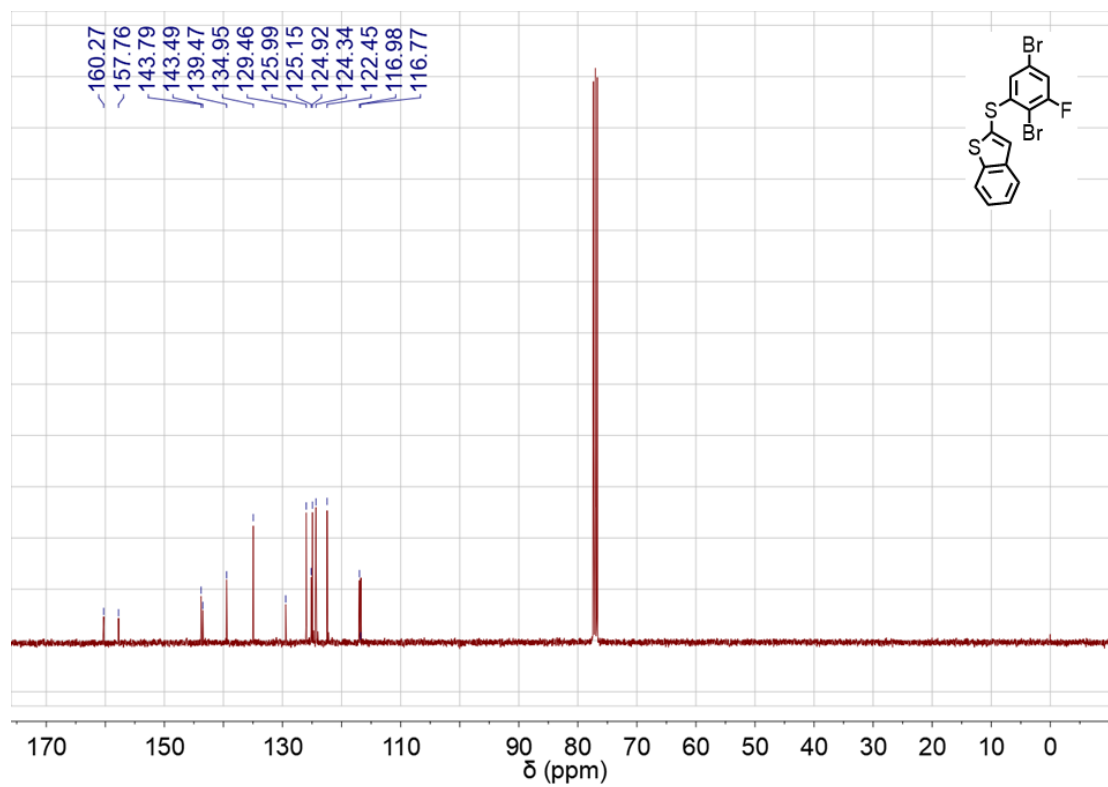

**Figure S39.**  $^{13}\text{C}$  NMR spectrum of **7**.

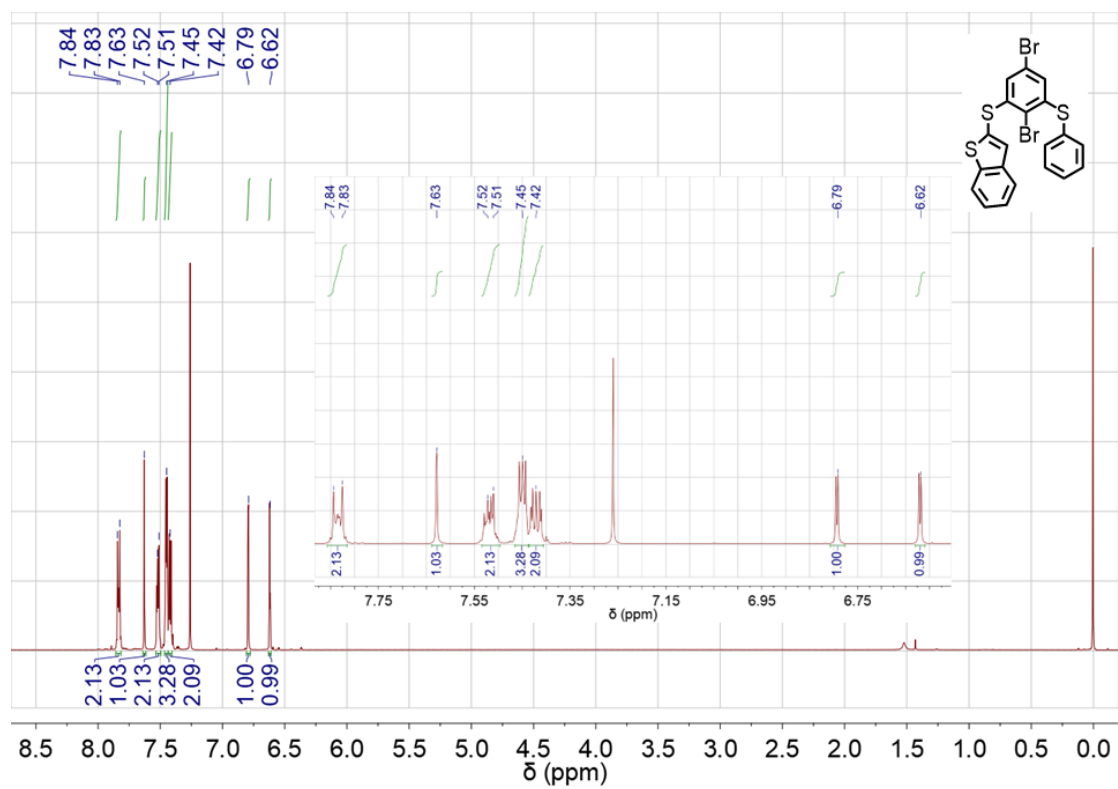

**Figure S40.**  $^1\text{H}$  NMR spectrum of **8**.

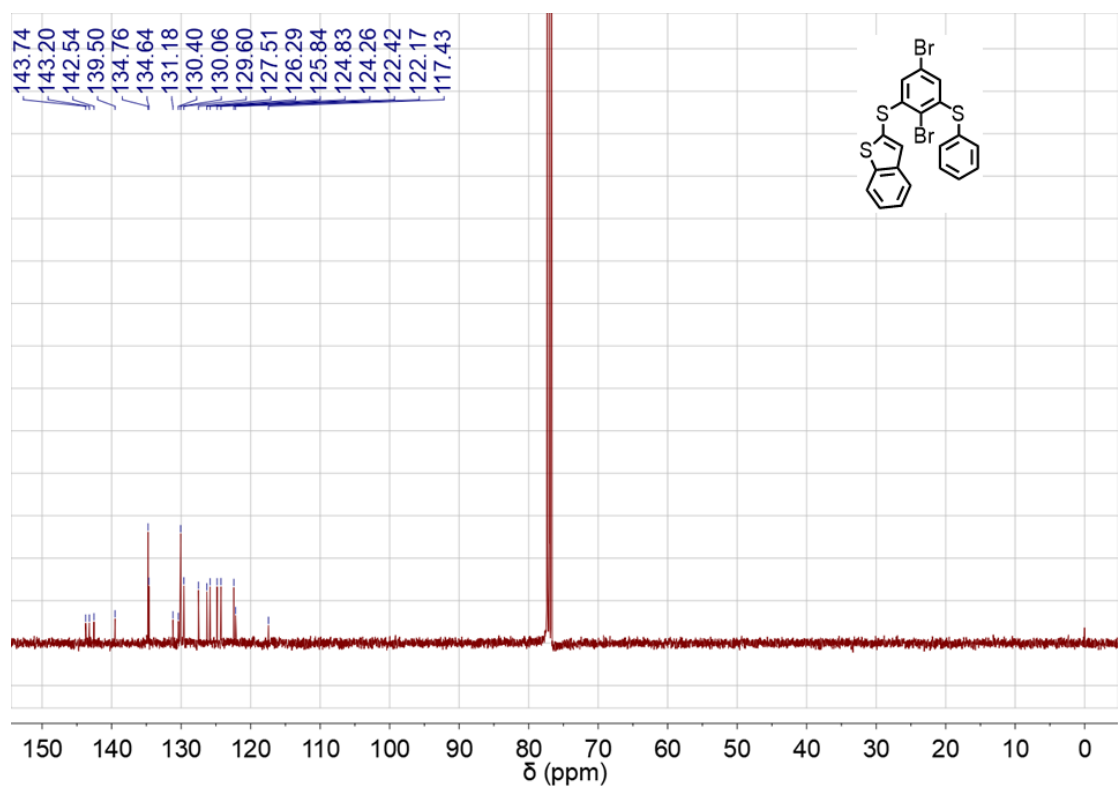

**Figure S41.**  $^{13}\text{C}$  NMR spectrum of **8**.

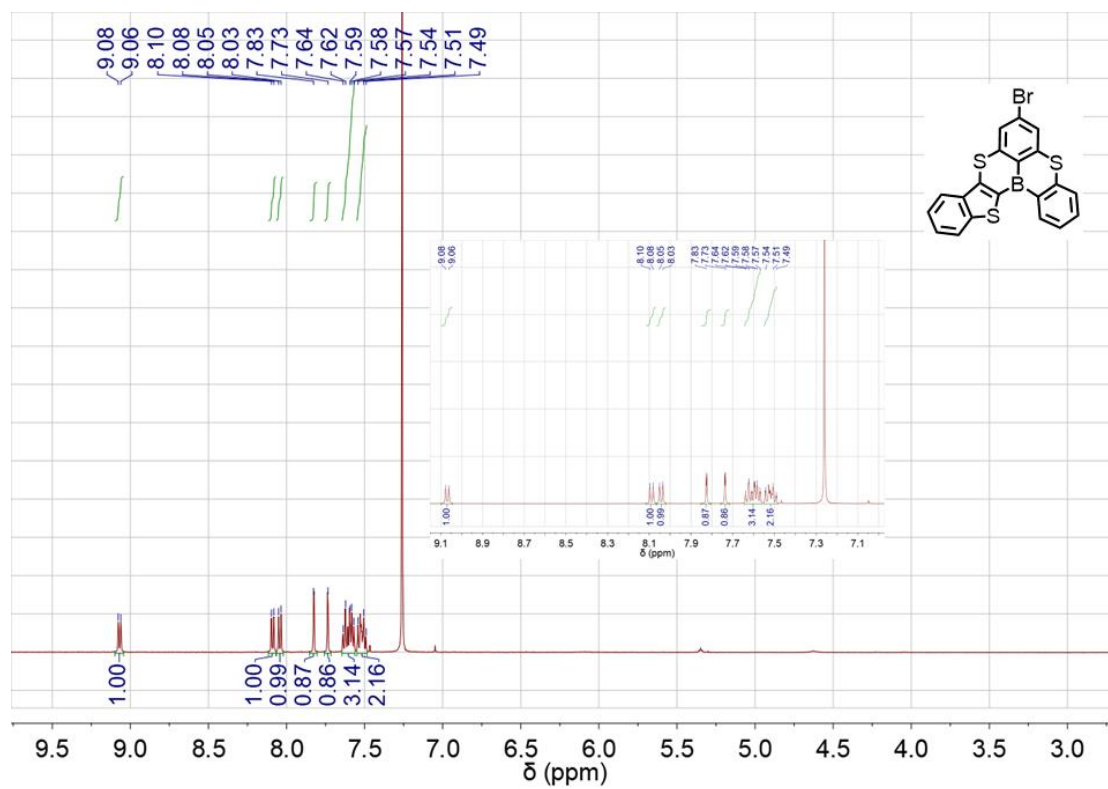

**Figure S42.**  $^1\text{H}$  NMR spectrum of  $\alpha$ -ThBSS-Br.

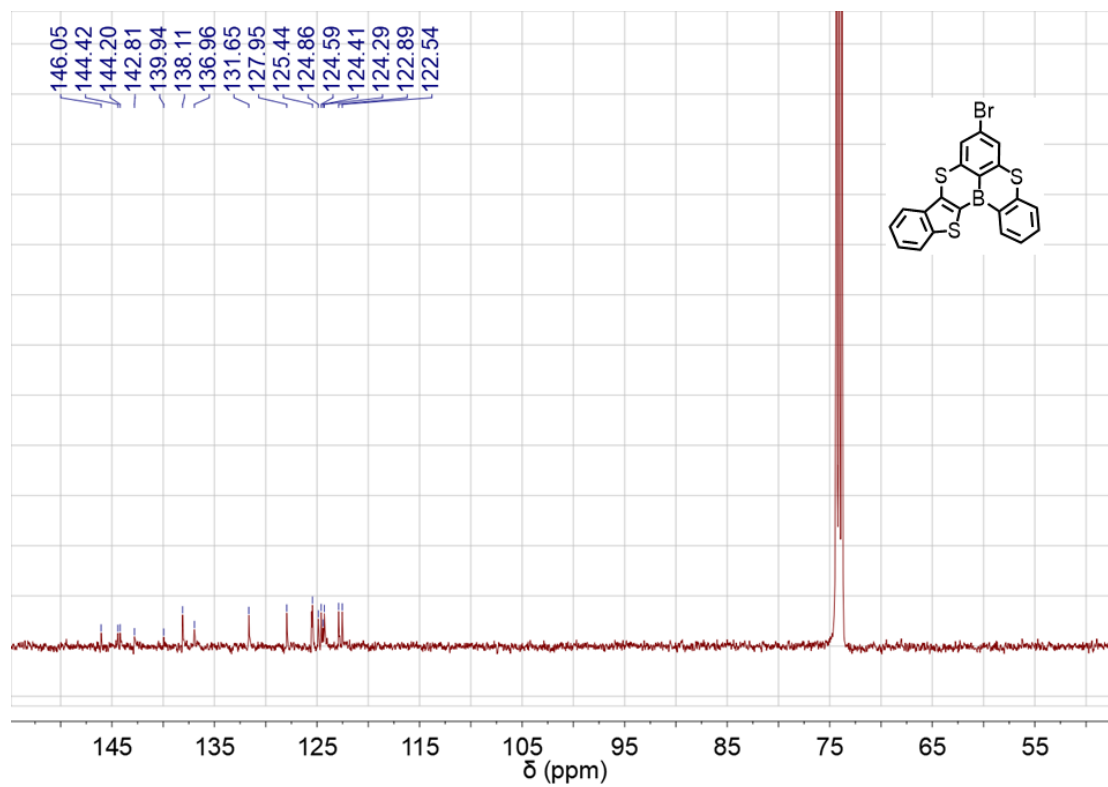

**Figure S43.**  $^{13}\text{C}$  NMR spectrum of  $\alpha$ -ThBSS-Br.

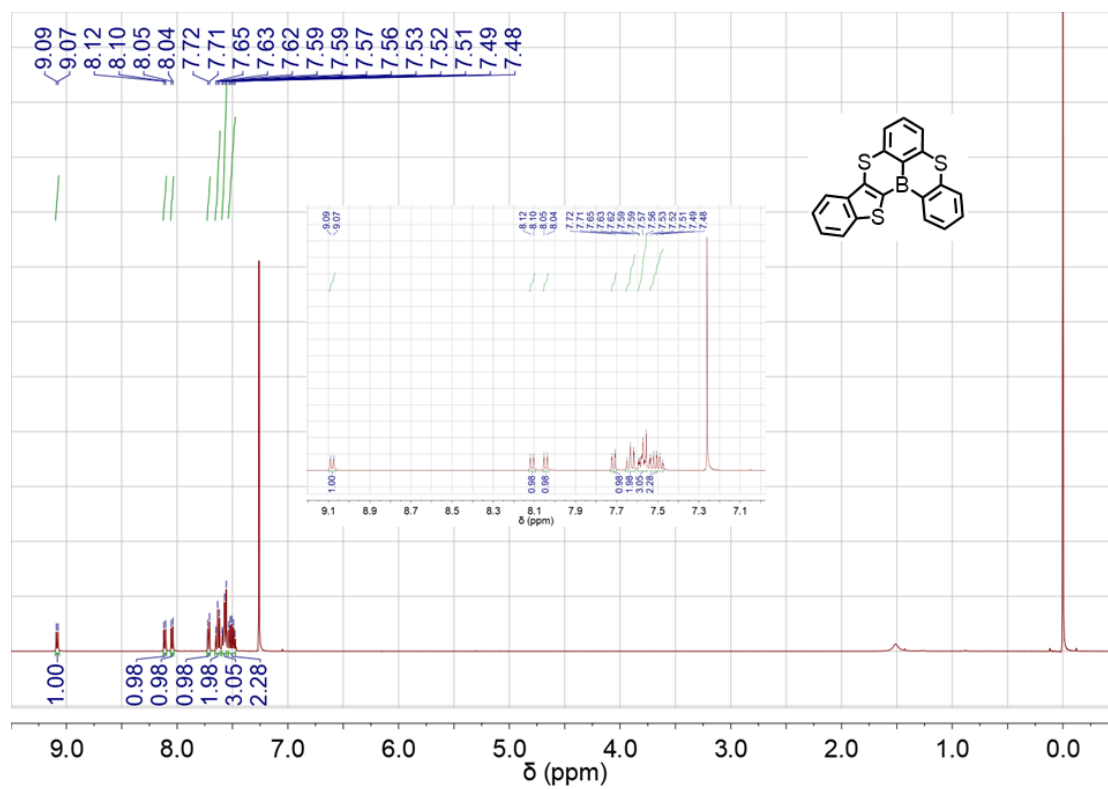

**Figure S44.**  $^1\text{H}$  NMR spectrum of  $\alpha$ -ThBSS.

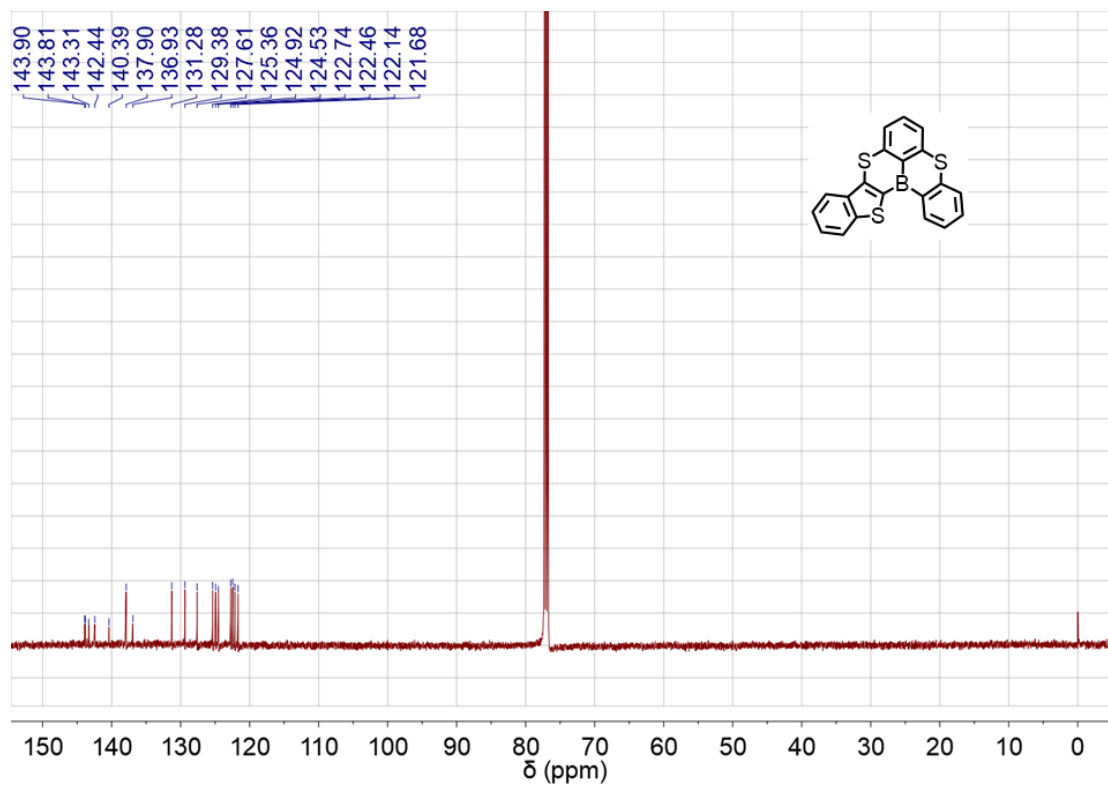

**Figure S45.**  $^{13}\text{C}$  NMR spectrum of  $\alpha$ -ThBSS.



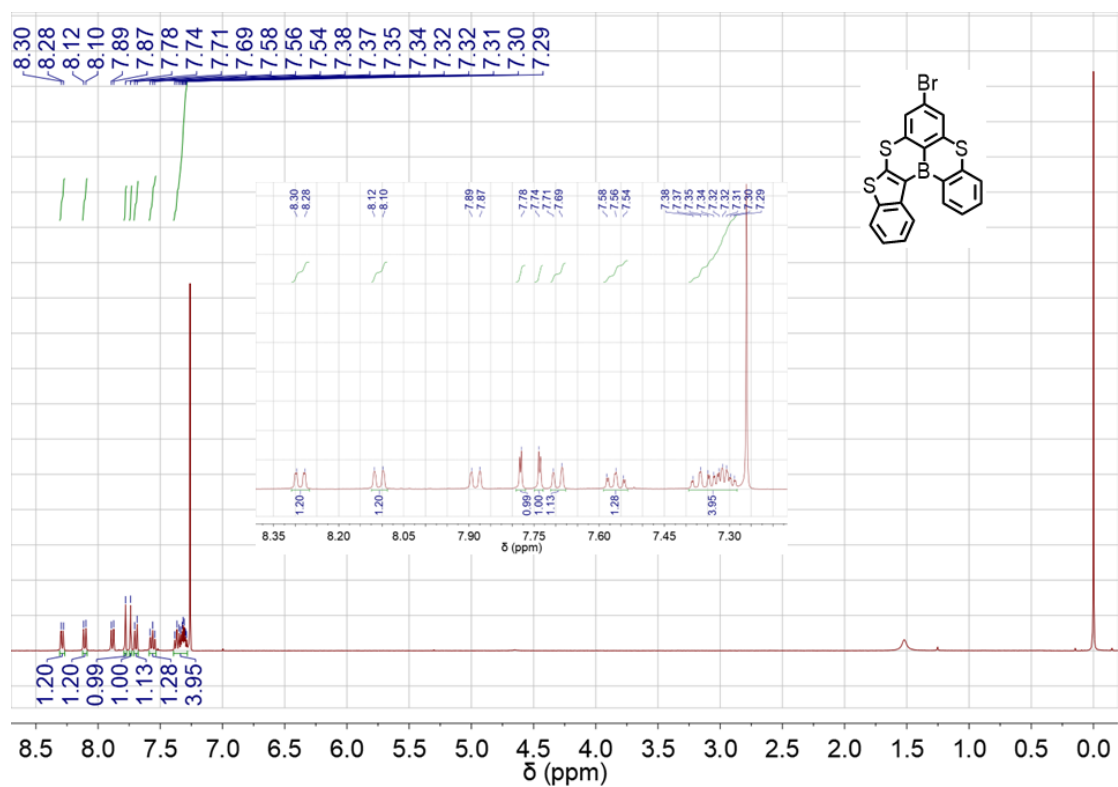

**Figure S46.**  $^1\text{H}$  NMR spectrum of  $\beta$ -ThBSS-Br.

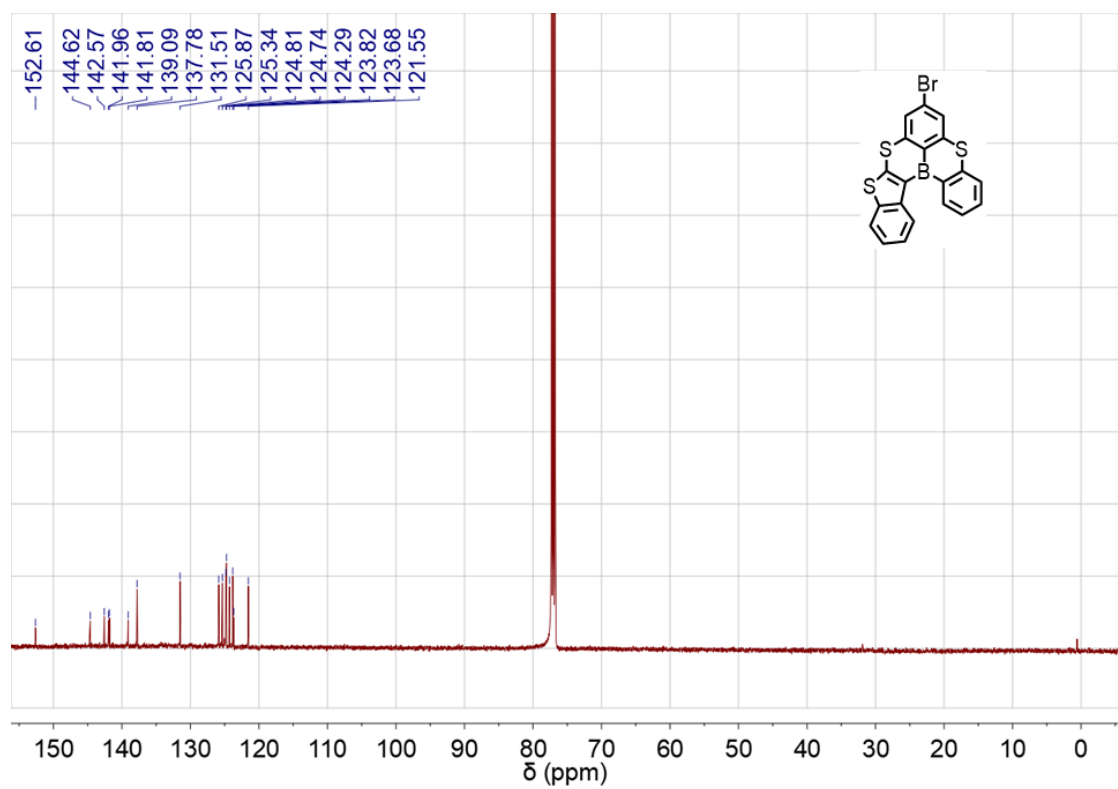

**Figure S47.**  $^{13}\text{C}$  NMR spectrum of  $\beta$ -ThBSS-Br.

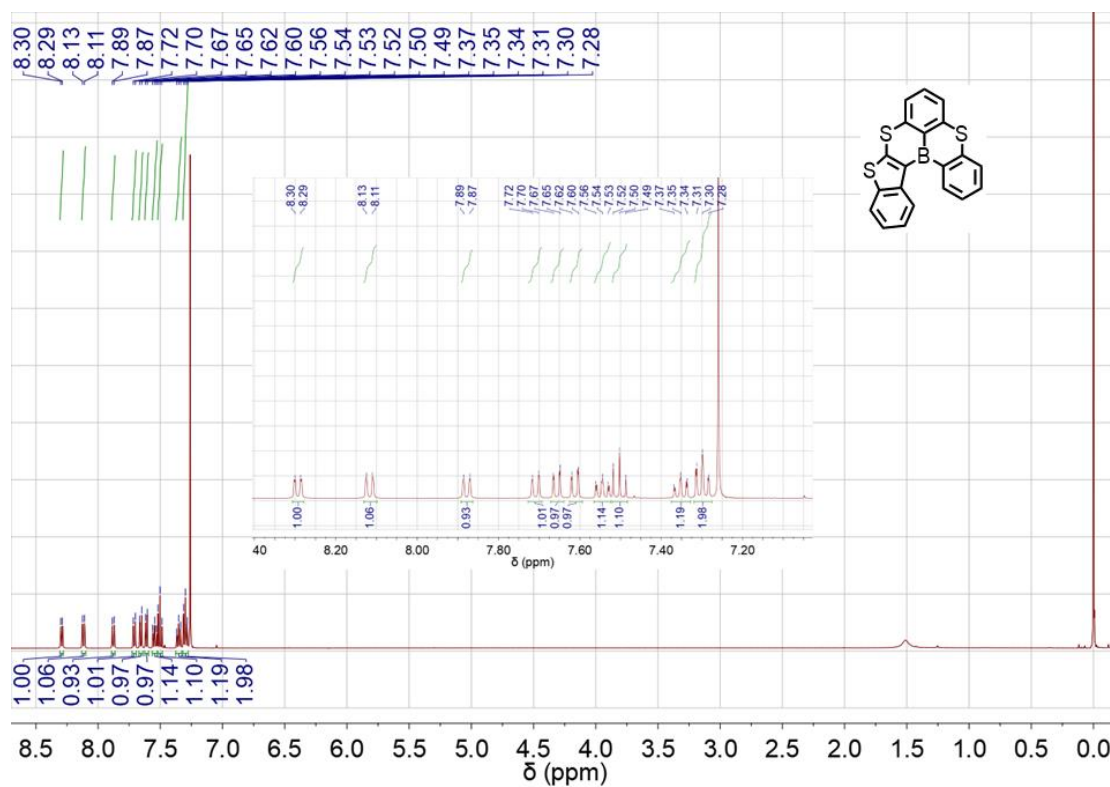

**Figure S48.**  $^1\text{H}$  NMR spectrum of  $\beta$ -ThBSS.

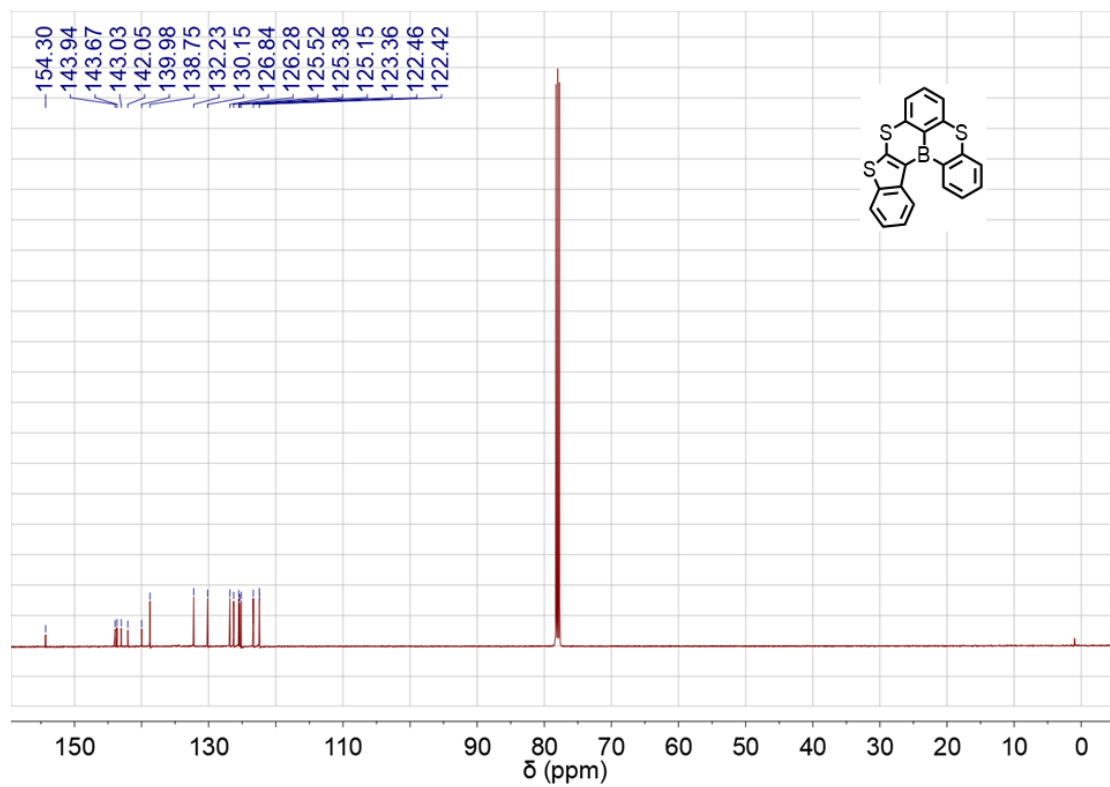

**Figure S49.**  $^{13}\text{C}$  NMR spectrum of  $\beta$ -ThBSS.

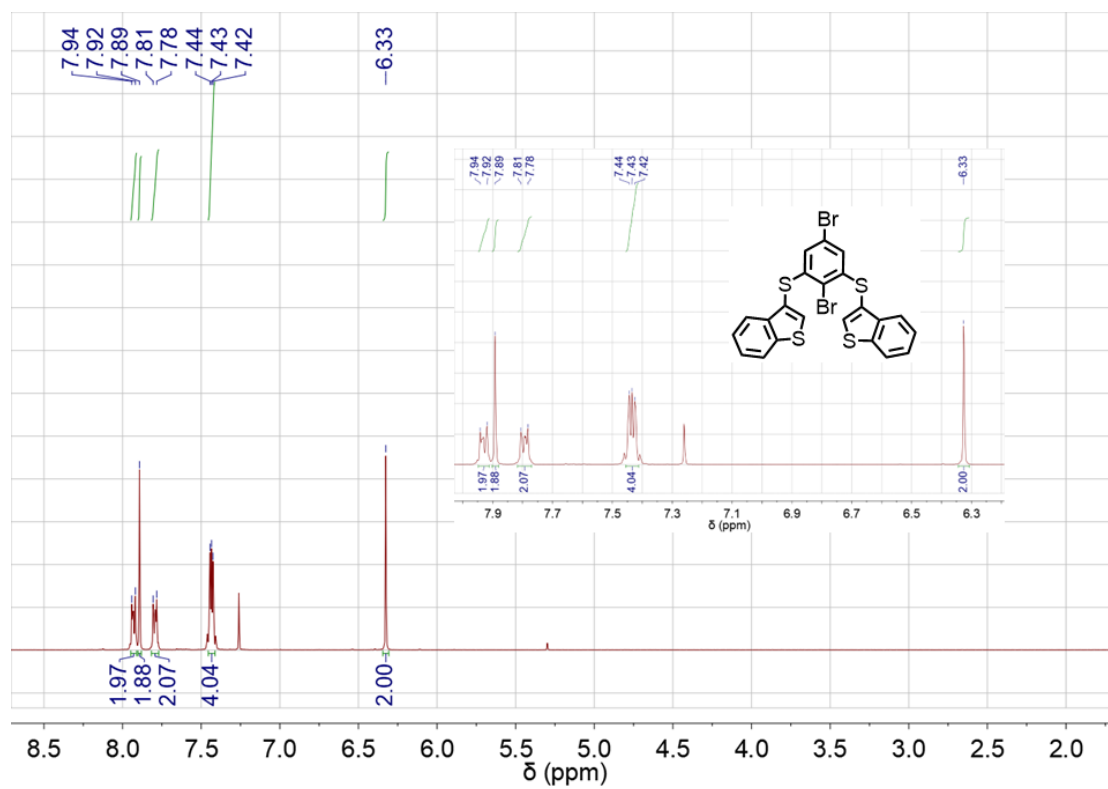

**Figure S50.** <sup>1</sup>H NMR spectrum of **9**.

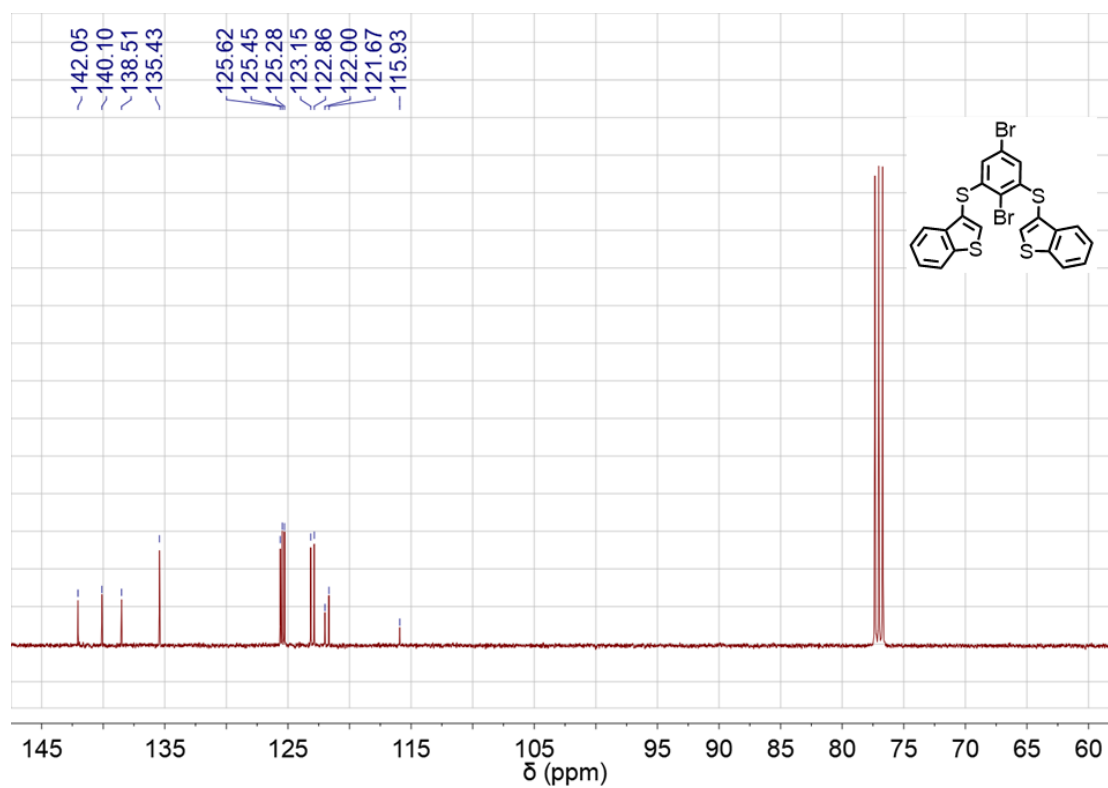

**Figure S51.** <sup>13</sup>C NMR spectrum of **9**.

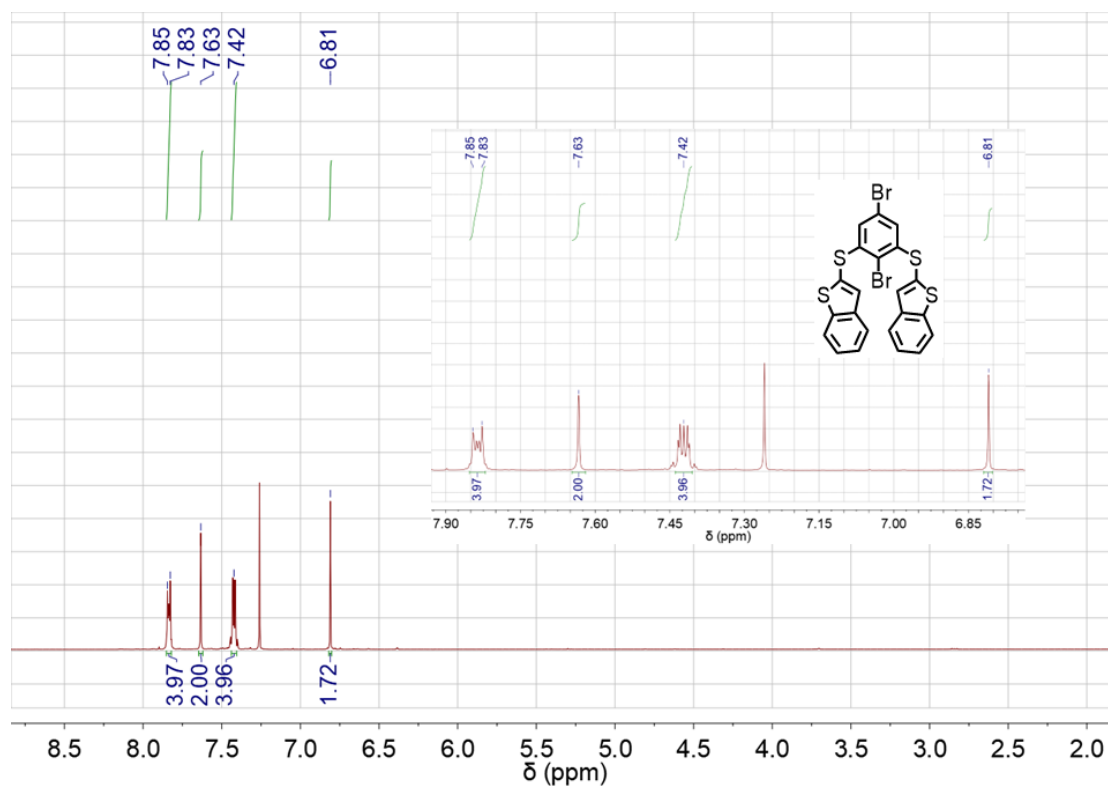

**Figure S52.**  $^1\text{H}$  NMR spectrum of **10**.

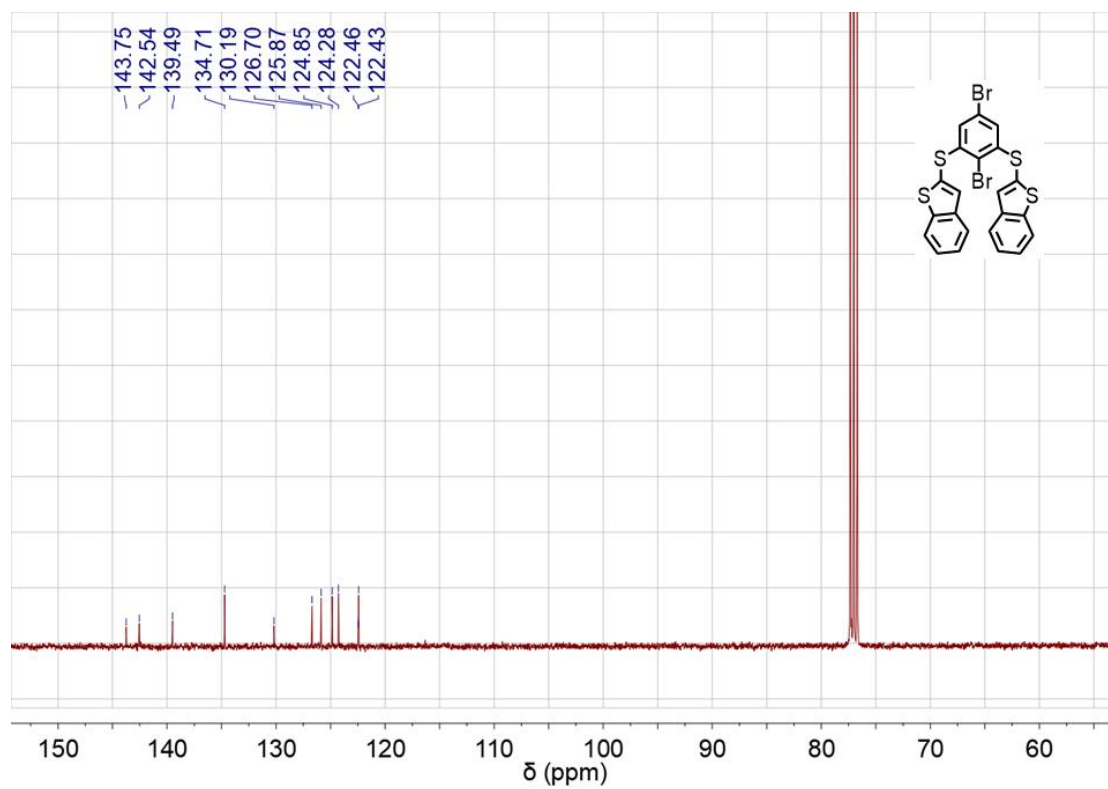

**Figure S53.**  $^{13}\text{C}$  NMR spectrum of **10**.

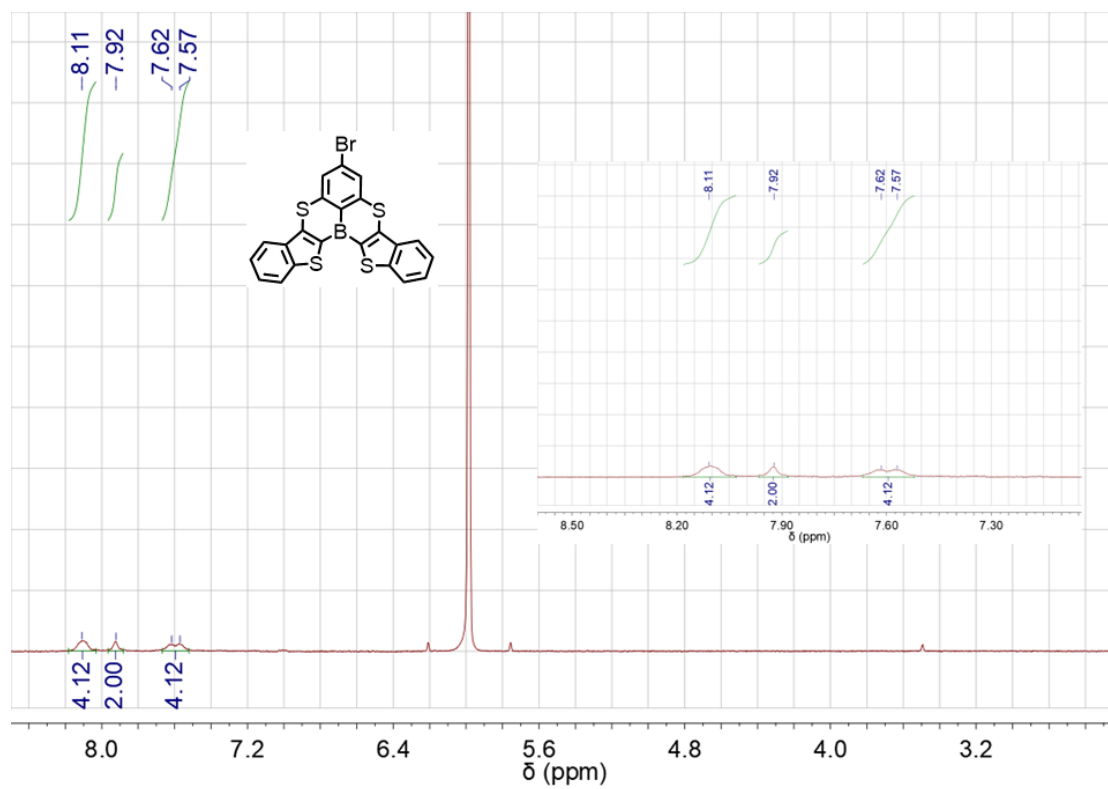

**Figure S54.**  $^1\text{H}$  NMR spectrum of  $\alpha$ -DThBSS-Br.

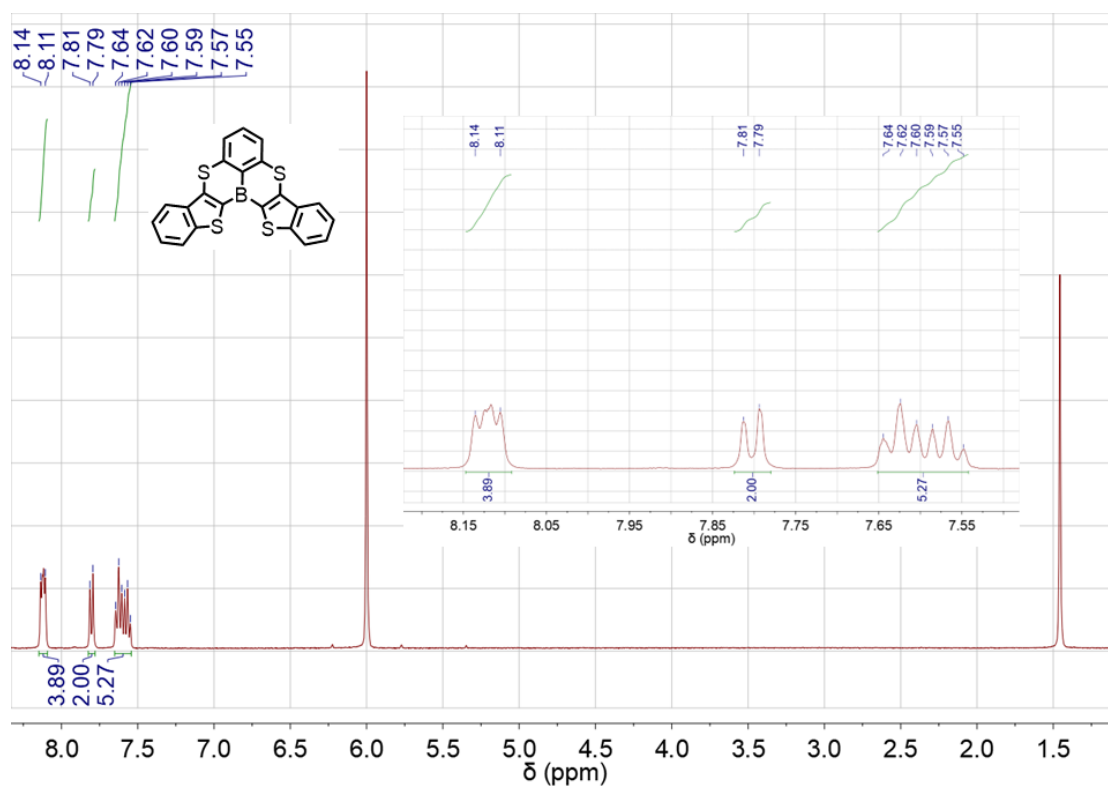

**Figure S55.**  $^1\text{H}$  NMR spectrum of  $\alpha$ -DThBSS.

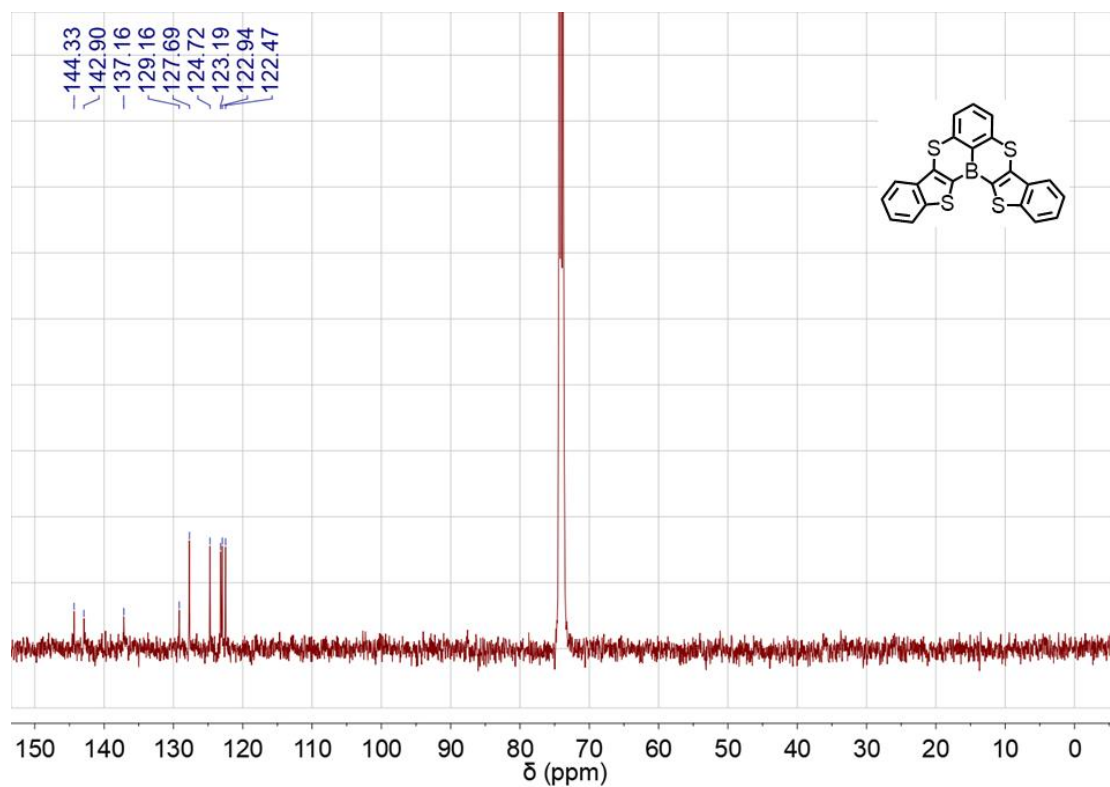

**Figure S56.**  $^{13}\text{C}$  NMR spectrum of  $\alpha$ -DThBSS.

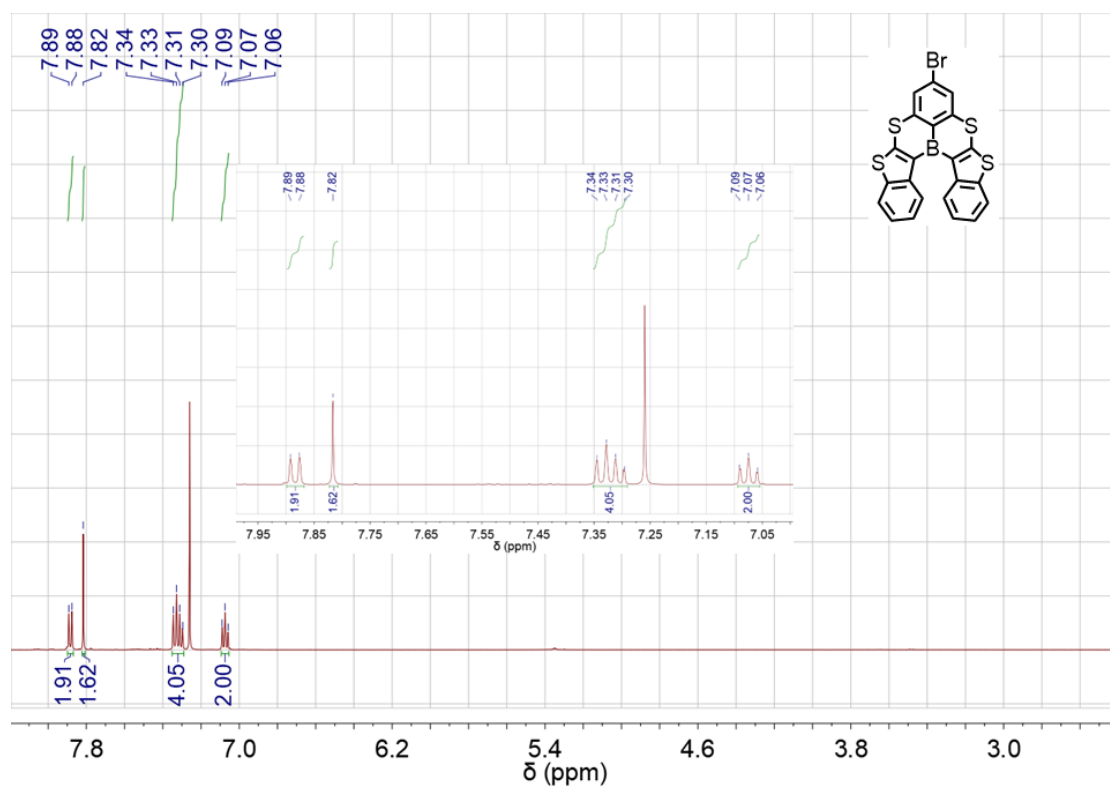

**Figure S57.**  $^1\text{H}$  NMR spectrum of  $\beta$ -DThBSS-Br.

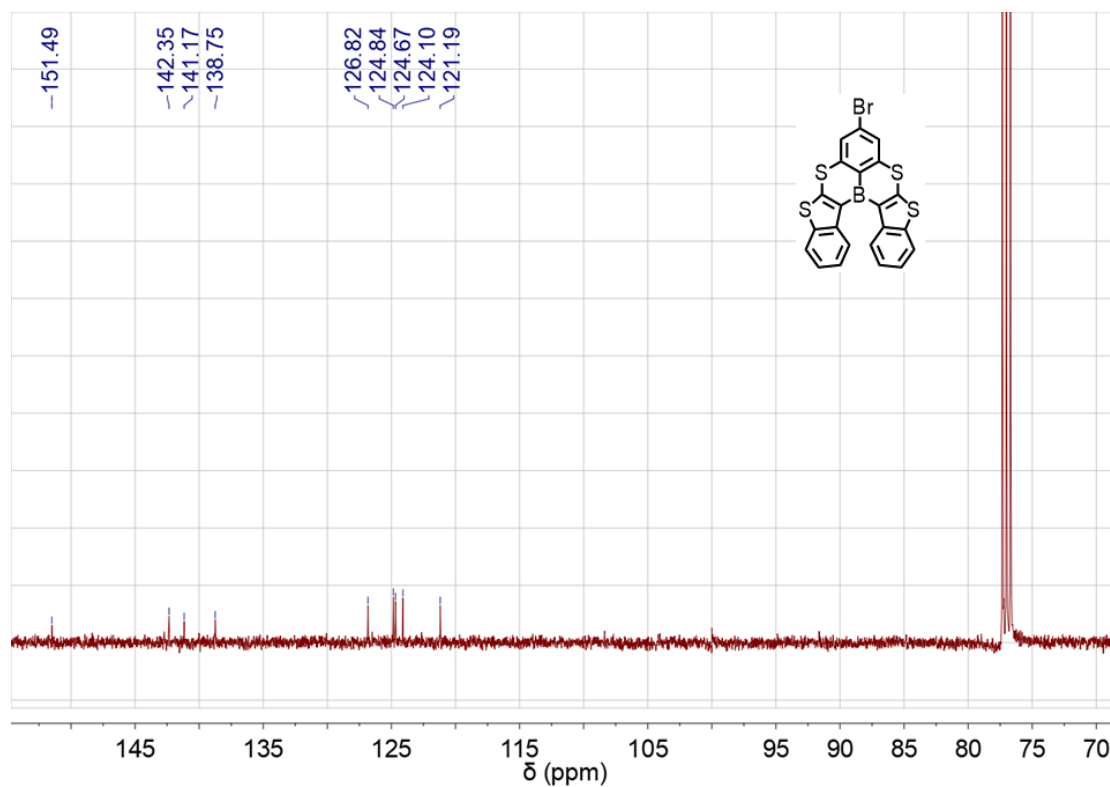

Figure S58.  $^{13}\text{C}$  NMR spectrum of  $\beta$ -DThBSS-Br.

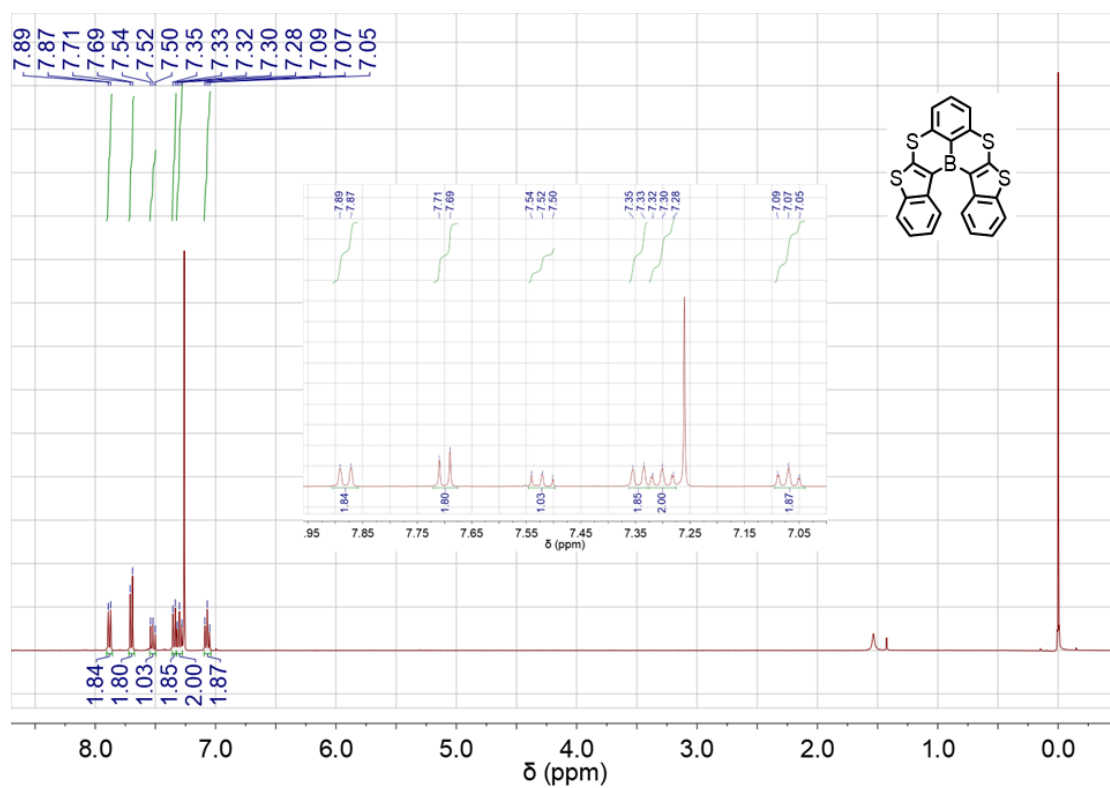

Figure S59.  $^1\text{H}$  NMR spectrum of  $\beta$ -DThBSS.

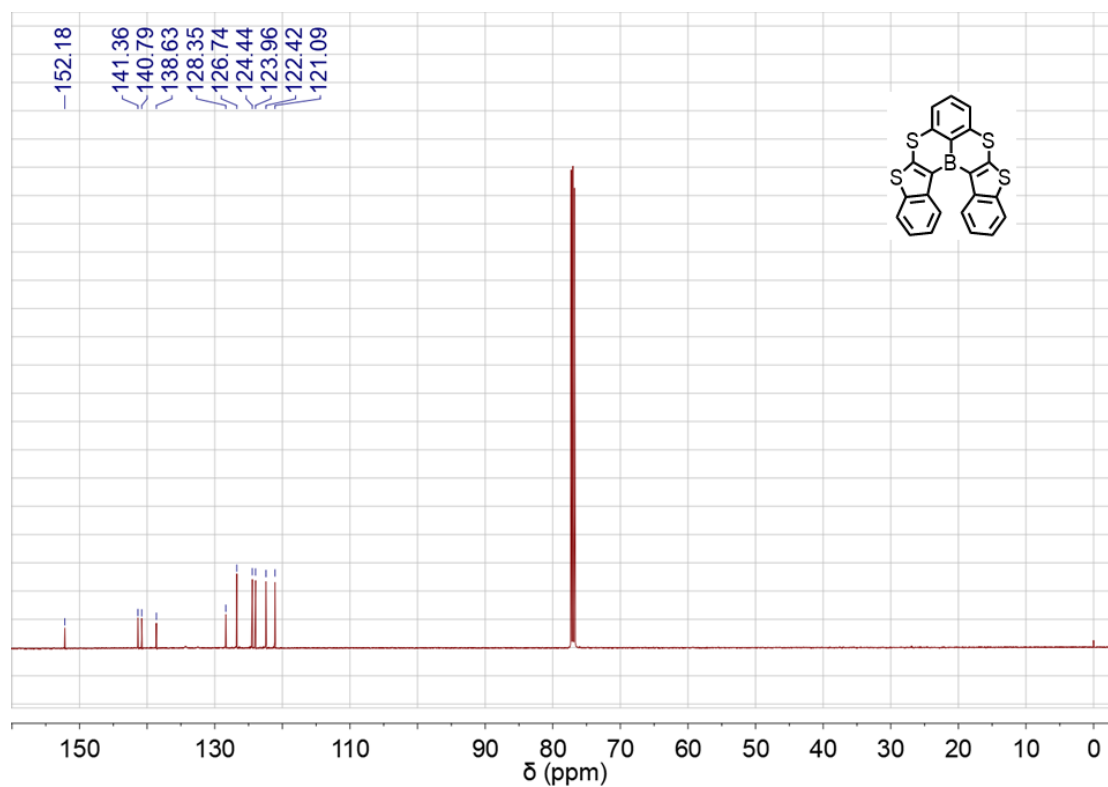

**Figure S60.**  $^{13}\text{C}$  NMR spectrum of  $\beta$ -DThBSS.

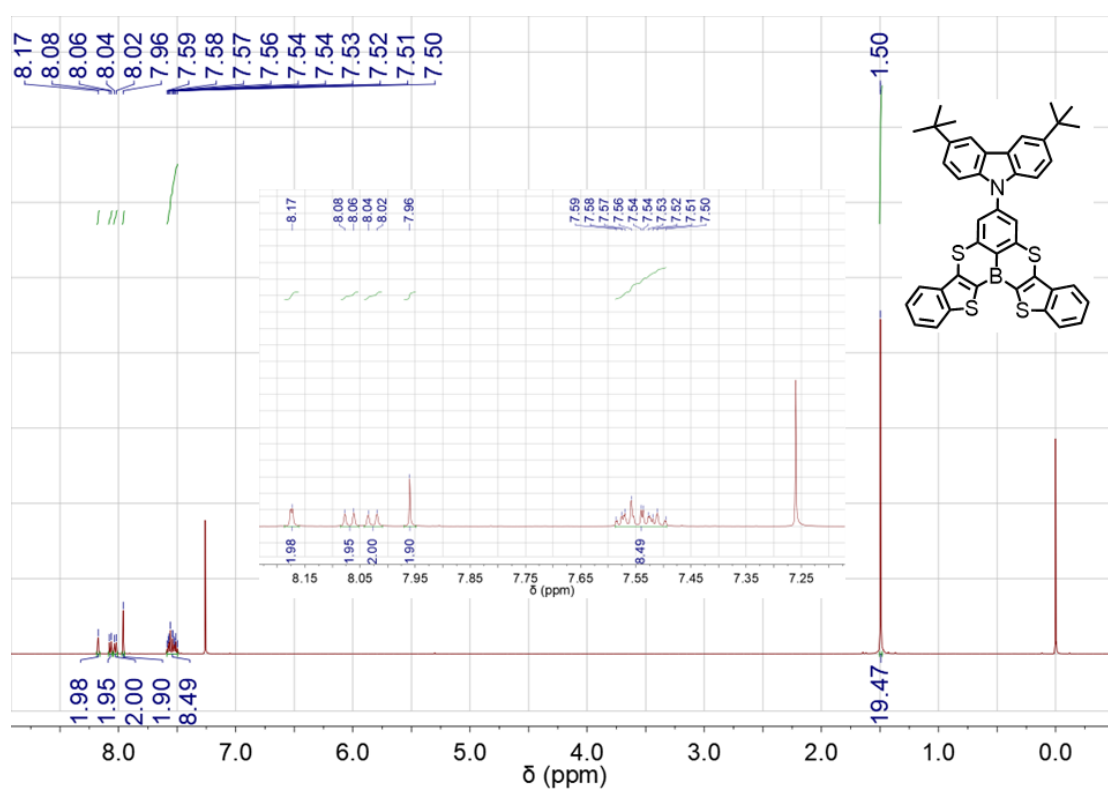

**Figure S61.**  $^1\text{H}$  NMR spectrum of  $\alpha$ -DThBSS-Cz.



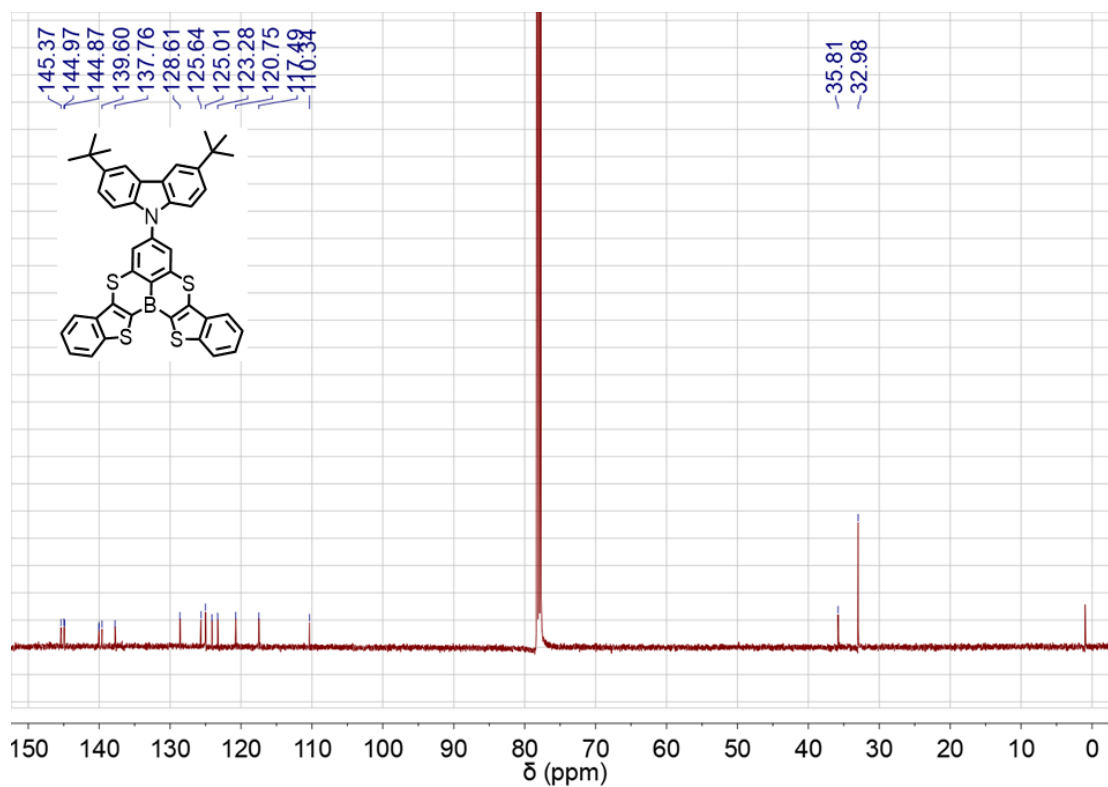

**Figure S62.**  $^{13}\text{C}$  NMR spectrum of  $\alpha$ -DThBSS-Cz.

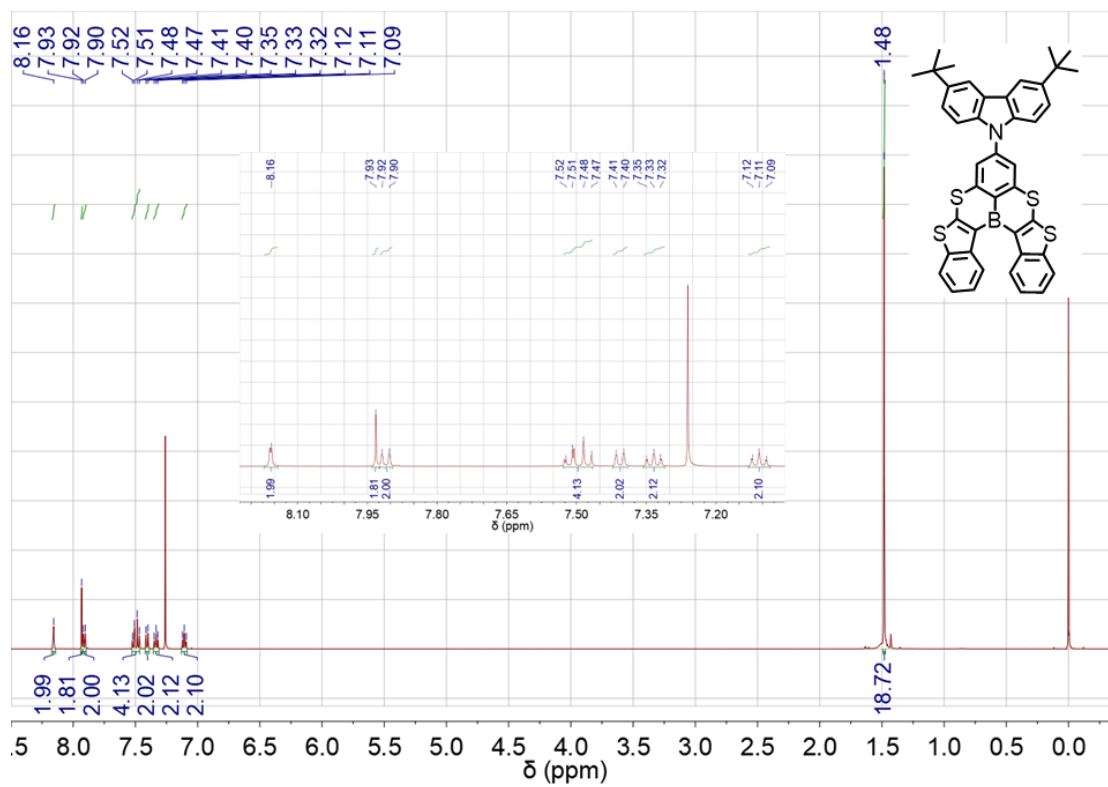

**Figure S63.**  $^1\text{H}$  NMR spectrum of  $\beta$ -DThBSS-Cz.

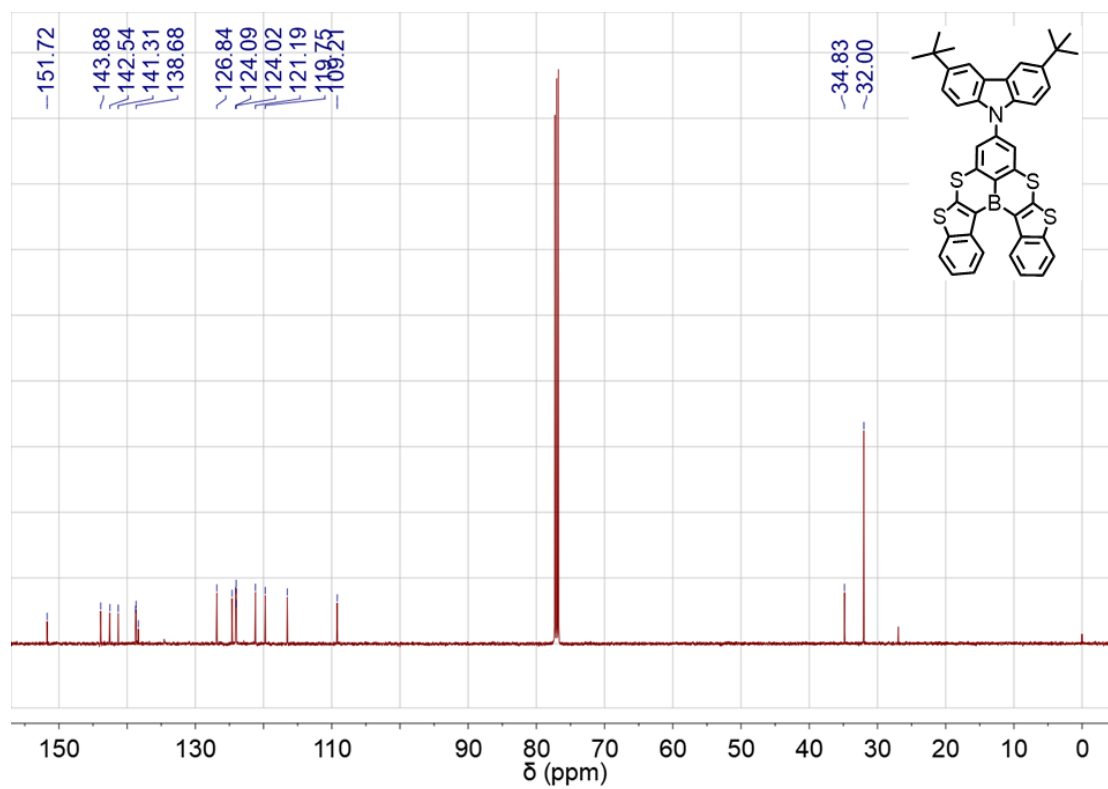

**Figure S64.**  $^{13}\text{C}$  NMR spectrum of  $\beta$ -DThBSS-Cz.

## High resolution mass spectrum

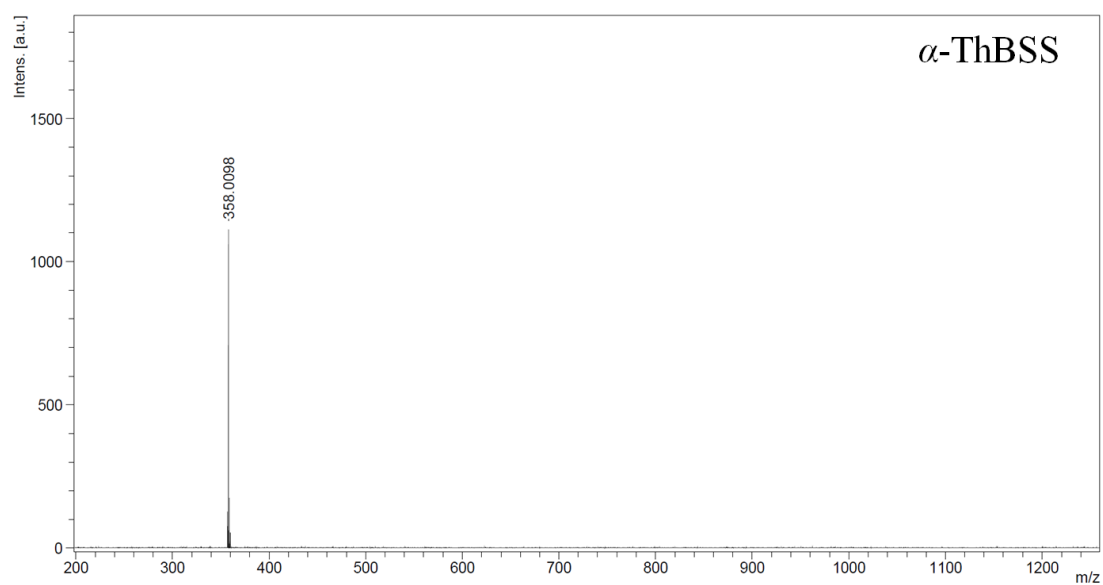

**Figure S65.** HRMS data of  $\alpha$ -ThBSS.

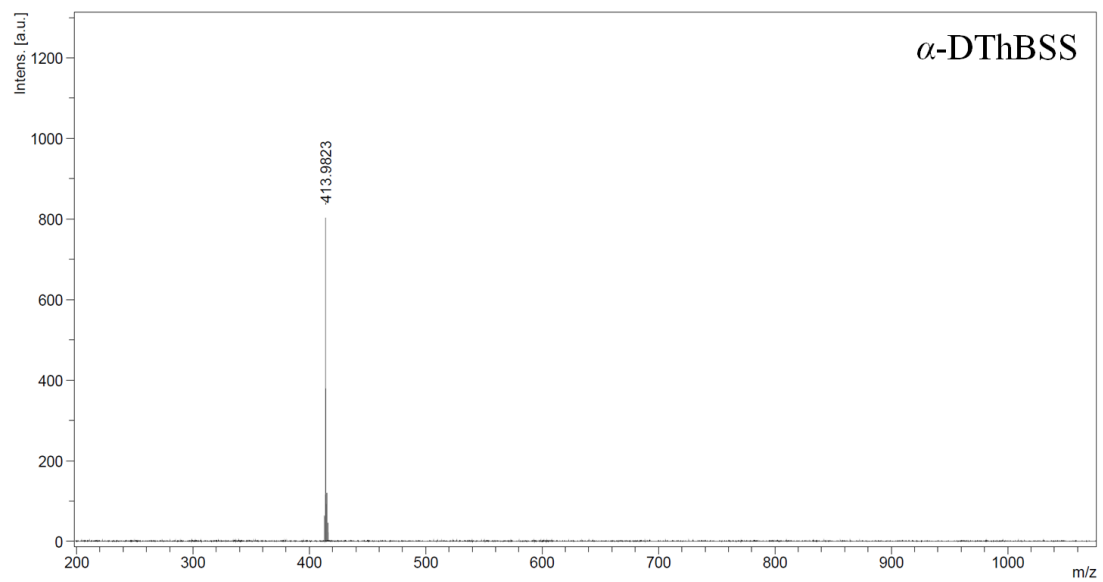

**Figure S66.** HRMS data of  $\alpha$ -DThBSS.

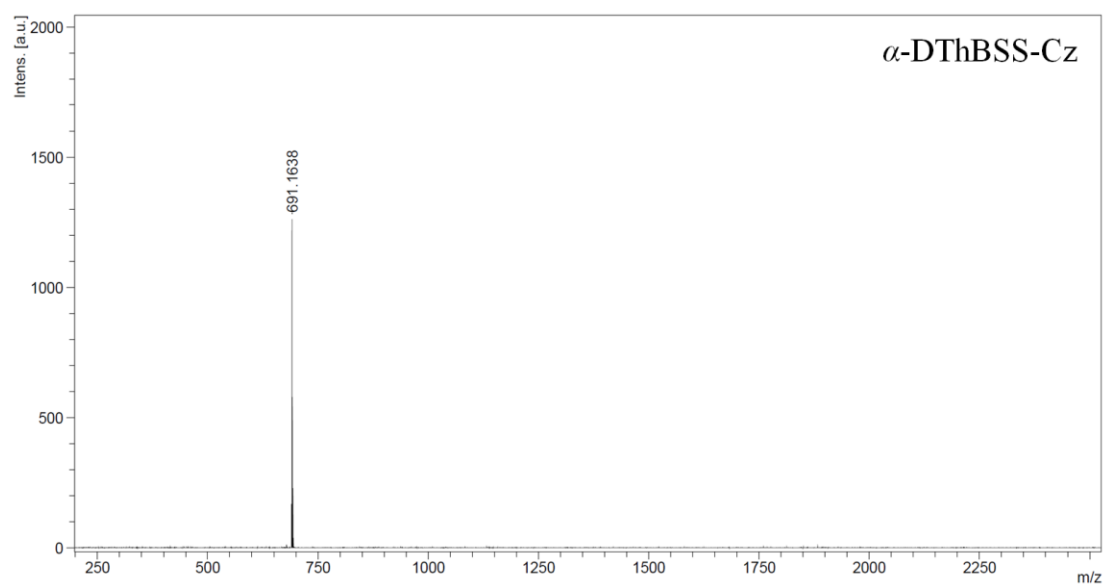

**Figure S67.** HRMS data of  $\alpha$ -DThBSS-Cz.

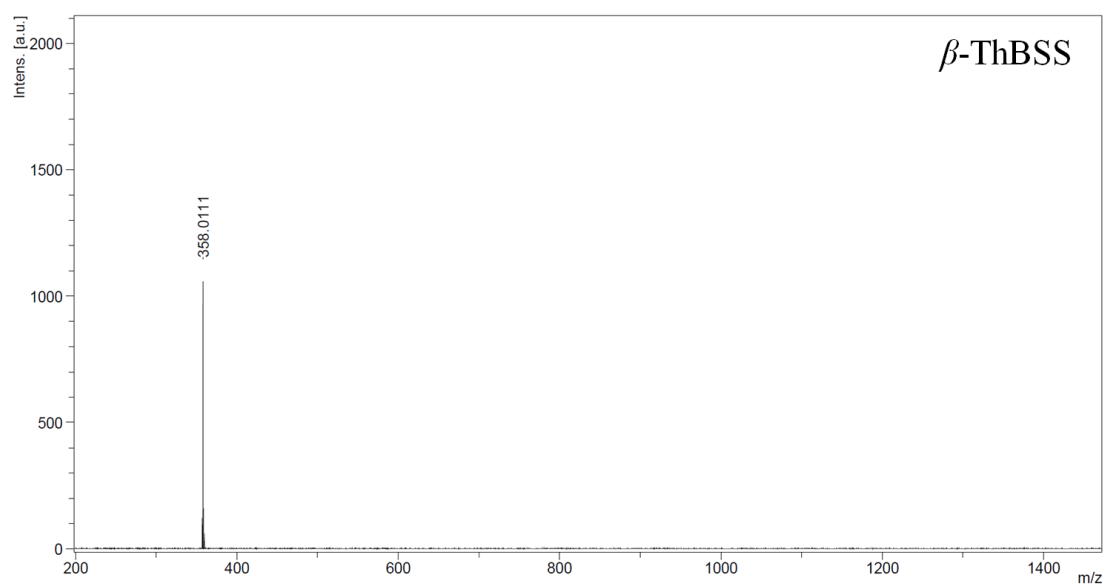

**Figure S68.** HRMS data of  $\beta$ -ThBSS.

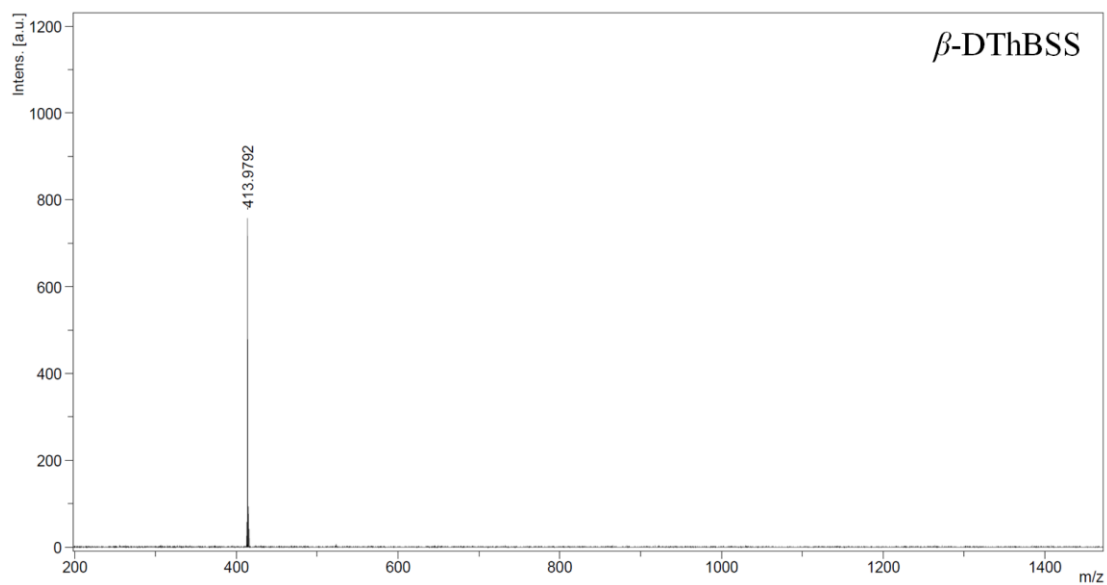

**Figure S69.** HRMS data of  $\beta$ -DThBSS.

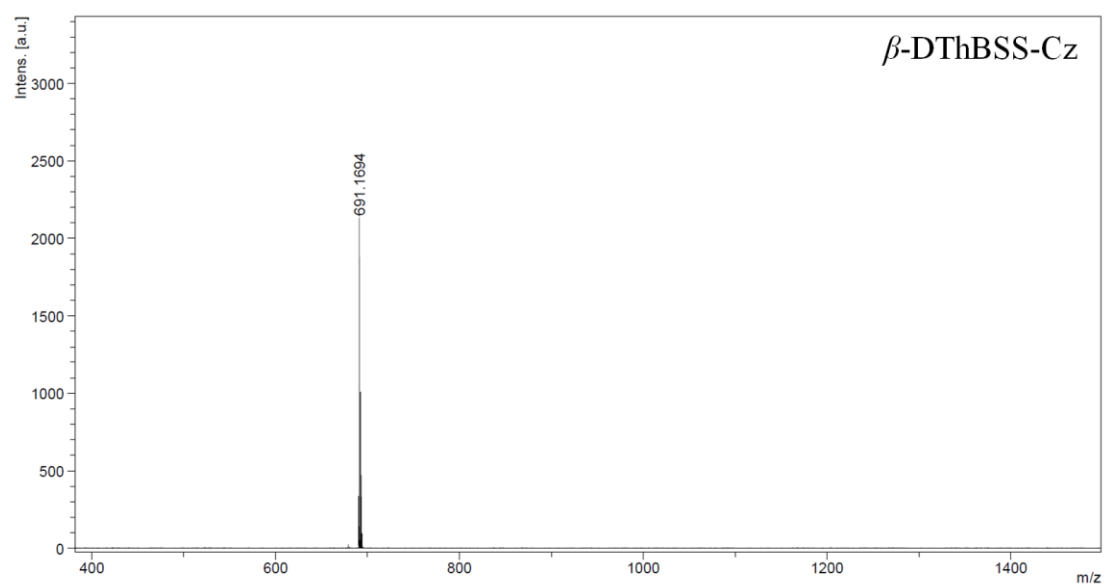

**Figure S70.** HRMS data of  $\beta$ -DThBSS-Cz.

## Cartesian coordinates (Å) for optimized geometry

### S<sub>0</sub> state of $\alpha$ -ThBSS

| atom | X         | Y         | Z         |
|------|-----------|-----------|-----------|
| C    | 3.077739  | 2.901718  | -0.000115 |
| C    | 2.609110  | 1.583172  | -0.000074 |
| C    | 1.222856  | 1.257725  | 0.000038  |
| C    | 0.353016  | 2.384639  | 0.000106  |
| C    | 0.817269  | 3.706018  | 0.000078  |
| C    | 2.179946  | 3.959731  | -0.000035 |
| B    | 0.720237  | -0.222454 | 0.000067  |
| C    | -0.824586 | -0.427682 | 0.000027  |
| C    | -1.740767 | 0.605203  | 0.000096  |
| S    | -1.391580 | 2.295159  | 0.000227  |
| C    | -3.248405 | -1.196533 | -0.000099 |
| H    | 4.152615  | 3.090713  | -0.000204 |
| H    | 0.101647  | 4.530039  | 0.000134  |
| H    | 2.545545  | 4.987504  | -0.000065 |
| C    | -3.130741 | 0.203892  | 0.000041  |
| S    | -1.697217 | -1.962631 | -0.000152 |
| C    | -4.504409 | -1.819168 | -0.000181 |
| C    | -4.290717 | 1.000399  | 0.000097  |
| C    | -5.634982 | -1.018404 | -0.000121 |
| C    | -5.530357 | 0.386062  | 0.000017  |
| H    | -4.210269 | 2.089308  | 0.000201  |
| H    | -6.435989 | 0.993554  | 0.000059  |
| H    | -6.621871 | -1.483356 | -0.000183 |
| H    | -4.585656 | -2.906698 | -0.000290 |
| C    | 1.765021  | -1.397756 | 0.000070  |
| C    | 1.393037  | -2.763726 | 0.000207  |
| C    | 3.157729  | -1.160227 | -0.000062 |
| C    | 2.306562  | -3.805526 | 0.000186  |
| H    | 0.343337  | -3.040957 | 0.000357  |
| C    | 4.096872  | -2.207337 | -0.000095 |
| C    | 3.675741  | -3.524237 | 0.000023  |
| H    | 1.953800  | -4.837303 | 0.000298  |
| H    | 5.162933  | -1.970689 | -0.000206 |
| H    | 4.409945  | -4.331371 | 0.000000  |
| S    | 3.906495  | 0.416458  | -0.000179 |

### S<sub>1</sub> state of $\alpha$ -ThBSS

| atom | X        | Y        | Z         |
|------|----------|----------|-----------|
| C    | 3.014933 | 2.922211 | -0.308177 |
| C    | 2.549830 | 1.588975 | -0.238741 |
| C    | 1.206470 | 1.256642 | 0.037158  |

|   |           |           |           |
|---|-----------|-----------|-----------|
| C | 0.357720  | 2.367561  | 0.232638  |
| C | 0.803764  | 3.697161  | 0.187143  |
| C | 2.143567  | 3.977186  | -0.089141 |
| B | 0.720201  | -0.229056 | 0.105258  |
| C | -0.803327 | -0.431235 | 0.053120  |
| C | -1.760912 | 0.594199  | 0.180298  |
| S | -1.358400 | 2.222494  | 0.580934  |
| C | -3.221899 | -1.192656 | -0.234021 |
| H | 4.068449  | 3.110667  | -0.524971 |
| H | 0.095720  | 4.509748  | 0.362951  |
| H | 2.497020  | 5.007287  | -0.127687 |
| C | -3.128408 | 0.194899  | 0.024681  |
| S | -1.629824 | -1.923116 | -0.289934 |
| C | -4.446376 | -1.823380 | -0.416768 |
| C | -4.310366 | 0.956406  | 0.090676  |
| C | -5.610154 | -1.051792 | -0.339987 |
| C | -5.535707 | 0.324275  | -0.090167 |
| H | -4.261913 | 2.031275  | 0.275616  |
| H | -6.453776 | 0.911428  | -0.039658 |
| H | -6.581612 | -1.527232 | -0.479116 |
| H | -4.497036 | -2.894390 | -0.617633 |
| C | 1.762902  | -1.375107 | 0.183235  |
| C | 1.438776  | -2.699806 | 0.563675  |
| C | 3.138602  | -1.157016 | -0.102843 |
| C | 2.375737  | -3.724470 | 0.599025  |
| H | 0.415131  | -2.927705 | 0.862814  |
| C | 4.092882  | -2.181967 | -0.070787 |
| C | 3.712661  | -3.474993 | 0.269017  |
| H | 2.066094  | -4.728116 | 0.895190  |
| H | 5.135976  | -1.957801 | -0.305406 |
| H | 4.453035  | -4.274957 | 0.294981  |
| S | 3.786833  | 0.405780  | -0.559973 |

**T<sub>1</sub> state of  $\alpha$ -ThBSS**

| atom | X         | Y         | Z         |
|------|-----------|-----------|-----------|
| C    | 3.001132  | 2.953668  | 0.039136  |
| C    | 2.562725  | 1.615596  | 0.031773  |
| C    | 1.200875  | 1.250479  | -0.007059 |
| C    | 0.323192  | 2.359371  | -0.034392 |
| C    | 0.742601  | 3.682298  | -0.029963 |
| C    | 2.100455  | 3.979317  | 0.007066  |
| B    | 0.723270  | -0.261182 | -0.016556 |
| C    | -0.804199 | -0.473927 | -0.007924 |
| C    | -1.820617 | 0.601673  | -0.024892 |
| S    | -1.440850 | 2.254479  | -0.080413 |
| C    | -3.289673 | -1.218723 | 0.033313  |

|   |           |           |           |
|---|-----------|-----------|-----------|
| H | 4.072237  | 3.161760  | 0.069239  |
| H | 0.005580  | 4.487185  | -0.054345 |
| H | 2.438443  | 5.015387  | 0.010779  |
| C | -3.180848 | 0.184851  | -0.002917 |
| S | -1.684238 | -1.961662 | 0.038796  |
| C | -4.501703 | -1.869431 | 0.060142  |
| C | -4.365256 | 0.947141  | -0.010953 |
| C | -5.679101 | -1.092274 | 0.050926  |
| C | -5.598244 | 0.294741  | 0.015819  |
| H | -4.318137 | 2.037332  | -0.036816 |
| H | -6.513904 | 0.887777  | 0.009680  |
| H | -6.650804 | -1.585499 | 0.072305  |
| H | -4.552464 | -2.958695 | 0.088345  |
| C | 1.820489  | -1.402594 | -0.027800 |
| C | 1.538011  | -2.792644 | -0.088934 |
| C | 3.208725  | -1.108936 | 0.018949  |
| C | 2.510881  | -3.779015 | -0.090258 |
| H | 0.517587  | -3.135535 | -0.146823 |
| C | 4.197227  | -2.103077 | 0.019077  |
| C | 3.854834  | -3.431218 | -0.032393 |
| H | 2.216797  | -4.828154 | -0.139130 |
| H | 5.248513  | -1.810456 | 0.058297  |
| H | 4.631310  | -4.196684 | -0.032308 |
| S | 3.897554  | 0.497666  | 0.083571  |

**S<sub>0</sub> state of  $\alpha$ -DThBSS**

| atom | X         | Y         | Z         |
|------|-----------|-----------|-----------|
| C    | -1.202590 | 4.069979  | -0.000059 |
| C    | -1.201996 | 2.670528  | -0.000034 |
| C    | 0.000000  | 1.908720  | -0.000025 |
| C    | 1.201996  | 2.670528  | -0.000042 |
| C    | 1.202590  | 4.069979  | -0.000069 |
| C    | 0.000000  | 4.762824  | -0.000076 |
| B    | 0.000000  | 0.352858  | -0.000001 |
| C    | 1.363115  | -0.369097 | 0.000035  |
| C    | 2.579598  | 0.276113  | 0.000034  |
| S    | 2.819340  | 1.990956  | -0.000027 |
| S    | -2.819340 | 1.990956  | -0.000004 |
| C    | -2.579598 | 0.276113  | 0.000056  |
| C    | -1.363115 | -0.369097 | 0.000040  |
| C    | 3.326228  | -1.952470 | 0.000025  |
| C    | -3.326228 | -1.952470 | 0.000021  |
| H    | -2.150280 | 4.611380  | -0.000064 |
| H    | 2.150280  | 4.611380  | -0.000081 |
| H    | 0.000000  | 5.853582  | -0.000095 |
| C    | 3.727140  | -0.601763 | -0.000002 |



|   |           |           |           |
|---|-----------|-----------|-----------|
| S | 1.598577  | -2.110393 | 0.000177  |
| C | 4.273269  | -2.986092 | -0.000018 |
| C | 5.096831  | -0.280793 | -0.000075 |
| C | 5.617265  | -2.649288 | -0.000090 |
| C | 6.029493  | -1.302411 | -0.000118 |
| H | 5.414027  | 0.764222  | -0.000101 |
| H | 7.093995  | -1.065806 | -0.000172 |
| H | 6.367870  | -3.441013 | -0.000115 |
| H | 3.955874  | -4.029604 | 0.000022  |
| C | -5.096831 | -0.280793 | -0.000078 |
| C | -4.273269 | -2.986092 | -0.000045 |
| C | -5.617265 | -2.649288 | -0.000128 |
| C | -6.029493 | -1.302412 | -0.000144 |
| C | -3.727140 | -0.601763 | 0.000006  |
| S | -1.598577 | -2.110393 | 0.000218  |
| H | -5.414027 | 0.764222  | -0.000096 |
| H | -7.093995 | -1.065806 | -0.000206 |
| H | -6.367870 | -3.441013 | -0.000165 |
| H | -3.955874 | -4.029604 | -0.000006 |

**S<sub>1</sub> state of  $\alpha$ -DThBSS**

| atom | X         | Y         | Z         |
|------|-----------|-----------|-----------|
| C    | 1.197172  | 4.068962  | 0.000018  |
| C    | 1.188408  | 2.660512  | 0.000013  |
| C    | 0.000000  | 1.899413  | 0.000010  |
| C    | -1.188408 | 2.660512  | 0.000010  |
| C    | -1.197172 | 4.068962  | 0.000014  |
| C    | 0.000000  | 4.773442  | 0.000018  |
| B    | 0.000000  | 0.325271  | 0.000005  |
| C    | -1.356294 | -0.376095 | -0.000001 |
| C    | -2.601923 | 0.272245  | -0.000002 |
| S    | -2.802708 | 1.985957  | 0.000004  |
| S    | 2.802708  | 1.985957  | 0.000011  |
| C    | 2.601923  | 0.272245  | 0.000004  |
| C    | 1.356294  | -0.376095 | 0.000003  |
| C    | -3.354002 | -1.950207 | -0.000012 |
| C    | 3.354002  | -1.950207 | -0.000002 |
| H    | 2.150325  | 4.601803  | 0.000020  |
| H    | -2.150325 | 4.601803  | 0.000014  |
| H    | 0.000000  | 5.863284  | 0.000021  |
| C    | -3.746908 | -0.591449 | -0.000008 |
| S    | -1.608343 | -2.098188 | -0.000010 |
| C    | -4.287779 | -2.980788 | -0.000017 |
| C    | -5.119253 | -0.277879 | -0.000010 |
| C    | -5.644671 | -2.649700 | -0.000019 |
| C    | -6.051080 | -1.308435 | -0.000015 |

|   |           |           |           |
|---|-----------|-----------|-----------|
| H | -5.445091 | 0.764320  | -0.000007 |
| H | -7.115586 | -1.069989 | -0.000017 |
| H | -6.392165 | -3.443666 | -0.000024 |
| H | -3.965987 | -4.023153 | -0.000021 |
| C | 5.119253  | -0.277879 | 0.000005  |
| C | 4.287779  | -2.980788 | -0.000005 |
| C | 5.644671  | -2.649700 | -0.000002 |
| C | 6.051080  | -1.308435 | 0.000003  |
| C | 3.746908  | -0.591449 | 0.000002  |
| S | 1.608343  | -2.098188 | -0.000008 |
| H | 5.445091  | 0.764320  | 0.000008  |
| H | 7.115586  | -1.069989 | 0.000005  |
| H | 6.392165  | -3.443666 | -0.000004 |
| H | 3.965987  | -4.023153 | -0.000009 |

**T<sub>1</sub> state of  $\alpha$ -DThBSS**

| atom | X         | Y         | Z         |
|------|-----------|-----------|-----------|
| C    | 1.197958  | 4.068140  | 0.000017  |
| C    | 1.189482  | 2.666996  | 0.000012  |
| C    | 0.000000  | 1.902912  | 0.000007  |
| C    | -1.189482 | 2.666996  | 0.000008  |
| C    | -1.197958 | 4.068140  | 0.000013  |
| C    | 0.000000  | 4.772100  | 0.000018  |
| B    | 0.000000  | 0.333459  | 0.000002  |
| C    | -1.347723 | -0.372356 | -0.000002 |
| C    | -2.610388 | 0.280593  | -0.000002 |
| S    | -2.816528 | 1.987821  | 0.000003  |
| S    | 2.816528  | 1.987821  | 0.000011  |
| C    | 2.610388  | 0.280593  | 0.000005  |
| C    | 1.347723  | -0.372356 | 0.000002  |
| C    | -3.347921 | -1.948140 | -0.000012 |
| C    | 3.347921  | -1.948140 | -0.000002 |
| H    | 2.149942  | 4.603180  | 0.000020  |
| H    | -2.149942 | 4.603180  | 0.000014  |
| H    | 0.000000  | 5.862017  | 0.000022  |
| C    | -3.747531 | -0.592575 | -0.000008 |
| S    | -1.596922 | -2.092744 | -0.000006 |
| C    | -4.273998 | -2.983104 | -0.000018 |
| C    | -5.120902 | -0.286785 | -0.000012 |
| C    | -5.634734 | -2.659734 | -0.000021 |
| C    | -6.048686 | -1.322431 | -0.000018 |
| H    | -5.451020 | 0.754008  | -0.000009 |
| H    | -7.114282 | -1.089397 | -0.000020 |
| H    | -6.376957 | -3.458580 | -0.000026 |
| H    | -3.946736 | -4.023754 | -0.000020 |
| C    | 5.120902  | -0.286785 | 0.000003  |

|   |          |           |           |
|---|----------|-----------|-----------|
| C | 4.273998 | -2.983104 | -0.000006 |
| C | 5.634734 | -2.659735 | -0.000005 |
| C | 6.048686 | -1.322431 | 0.000000  |
| C | 3.747532 | -0.592575 | 0.000003  |
| S | 1.596922 | -2.092744 | 0.000000  |
| H | 5.451020 | 0.754008  | 0.000007  |
| H | 7.114282 | -1.089397 | 0.000000  |
| H | 6.376957 | -3.458580 | -0.000007 |
| H | 3.946736 | -4.023754 | -0.000008 |

**S<sub>0</sub> state of  $\alpha$ -DThBSS-Cz**

| atom | X         | Y         | Z         |
|------|-----------|-----------|-----------|
| C    | -0.318190 | -1.136235 | 0.399502  |
| C    | 1.078556  | -1.136278 | 0.386832  |
| C    | 1.843323  | -0.000002 | -0.000005 |
| C    | 1.078556  | 1.136273  | -0.386841 |
| C    | -0.318190 | 1.136231  | -0.399510 |
| C    | -1.019356 | -0.000002 | -0.000004 |
| B    | 3.396538  | -0.000002 | -0.000005 |
| C    | 4.118721  | 1.291755  | -0.435337 |
| C    | 3.473291  | 2.440470  | -0.834341 |
| S    | 1.757571  | 2.666160  | -0.915408 |
| S    | 1.757571  | -2.666164 | 0.915401  |
| C    | 3.473291  | -2.440473 | 0.834337  |
| C    | 4.118721  | -1.291758 | 0.435332  |
| C    | 5.700786  | 3.151498  | -1.063353 |
| C    | 5.700786  | -3.151499 | 1.063355  |
| H    | -0.869044 | -2.016031 | 0.736487  |
| H    | -0.869044 | 2.016027  | -0.736492 |
| C    | 4.350208  | 3.527607  | -1.204145 |
| S    | 5.859292  | 1.519079  | -0.499400 |
| C    | 6.735044  | 4.049048  | -1.363318 |
| C    | 4.030013  | 4.821508  | -1.653953 |
| C    | 6.399018  | 5.318601  | -1.804507 |
| C    | 5.052370  | 5.705075  | -1.950543 |
| H    | 2.985552  | 5.119781  | -1.766289 |
| H    | 4.815850  | 6.710698  | -2.299650 |
| H    | 7.191088  | 6.030307  | -2.041589 |
| H    | 7.778241  | 3.751666  | -1.250645 |
| C    | 4.030013  | -4.821509 | 1.653954  |
| C    | 6.735044  | -4.049048 | 1.363324  |
| C    | 6.399018  | -5.318601 | 1.804514  |
| C    | 5.052370  | -5.705075 | 1.950548  |
| C    | 4.350208  | -3.527609 | 1.204145  |
| S    | 5.859292  | -1.519080 | 0.499400  |
| H    | 2.985552  | -5.119783 | 1.766287  |

|   |           |           |           |
|---|-----------|-----------|-----------|
| H | 4.815850  | -6.710698 | 2.299655  |
| H | 7.191088  | -6.030306 | 2.041599  |
| H | 7.778241  | -3.751665 | 1.250653  |
| N | -2.425243 | -0.000001 | -0.000001 |
| C | -3.242255 | -0.988805 | -0.553011 |
| C | -3.242252 | 0.988804  | 0.553010  |
| C | -2.905939 | -2.146112 | -1.254509 |
| C | -4.594763 | -0.633603 | -0.355308 |
| C | -2.905932 | 2.146113  | 1.254502  |
| C | -4.594761 | 0.633602  | 0.355316  |
| C | -3.942003 | -2.949429 | -1.725718 |
| H | -1.867181 | -2.416897 | -1.443808 |
| C | -5.609795 | -1.458391 | -0.839146 |
| C | -3.941992 | 2.949432  | 1.725713  |
| H | -1.867172 | 2.416899  | 1.443793  |
| C | -5.609790 | 1.458390  | 0.839159  |
| C | -5.300481 | -2.635280 | -1.527600 |
| H | -3.671372 | -3.851731 | -2.272662 |
| H | -6.651405 | -1.171000 | -0.677741 |
| C | -5.300472 | 2.635281  | 1.527607  |
| H | -3.671358 | 3.851737  | 2.272652  |
| H | -6.651401 | 1.171000  | 0.677759  |
| C | -6.436511 | -3.524535 | -2.048228 |
| C | -6.436500 | 3.524540  | 2.048233  |
| C | -7.319417 | -3.966284 | -0.869932 |
| C | -7.285274 | -2.728609 | -3.052751 |
| C | -5.909396 | -4.778700 | -2.750493 |
| C | -7.285224 | 2.728645  | 3.052812  |
| C | -7.319443 | 3.966229  | 0.869943  |
| C | -5.909382 | 4.778742  | 2.750433  |
| H | -7.769208 | -3.104708 | -0.356079 |
| H | -8.137720 | -4.610562 | -1.226767 |
| H | -6.730085 | -4.530795 | -0.132436 |
| H | -7.722103 | -1.831052 | -2.591560 |
| H | -6.673644 | -2.405770 | -3.908177 |
| H | -8.111237 | -3.350496 | -3.431321 |
| H | -5.298064 | -4.524480 | -3.629004 |
| H | -5.302702 | -5.397573 | -2.072879 |
| H | -6.755899 | -5.390068 | -3.095968 |
| H | -8.111180 | 3.350538  | 3.431385  |
| H | -7.722061 | 1.831067  | 2.591668  |
| H | -6.673564 | 2.405842  | 3.908230  |
| H | -8.137748 | 4.610507  | 1.226774  |
| H | -6.730140 | 4.530721  | 0.132410  |
| H | -7.769232 | 3.104624  | 0.356135  |
| H | -5.298007 | 4.524566  | 3.628927  |
| H | -5.302730 | 5.397604  | 2.072772  |

|   |           |          |          |
|---|-----------|----------|----------|
| H | -6.755884 | 5.390104 | 3.095921 |
|---|-----------|----------|----------|

**S<sub>1</sub> state of  $\alpha$ -DThBSS-Cz**

| atom | X         | Y         | Z         |
|------|-----------|-----------|-----------|
| C    | -0.314937 | -1.128067 | 0.407955  |
| C    | 1.089526  | -1.121825 | 0.388458  |
| C    | 1.853656  | 0.000000  | 0.000000  |
| C    | 1.089525  | 1.121825  | -0.388458 |
| C    | -0.314938 | 1.128066  | -0.407955 |
| C    | -1.026664 | 0.000000  | 0.000000  |
| B    | 3.423870  | 0.000000  | 0.000000  |
| C    | 4.126294  | 1.284522  | -0.437262 |
| C    | 3.478428  | 2.461190  | -0.846398 |
| S    | 1.765053  | 2.650135  | -0.919732 |
| S    | 1.765053  | -2.650136 | 0.919731  |
| C    | 3.478428  | -2.461190 | 0.846398  |
| C    | 4.126295  | -1.284522 | 0.437262  |
| C    | 5.701361  | 3.176349  | -1.073537 |
| C    | 5.701362  | -3.176349 | 1.073537  |
| H    | -0.859583 | -2.010556 | 0.750513  |
| H    | -0.859583 | 2.010556  | -0.750513 |
| C    | 4.343314  | 3.545681  | -1.213056 |
| S    | 5.847341  | 1.526226  | -0.504555 |
| C    | 6.733473  | 4.060468  | -1.367826 |
| C    | 4.031790  | 4.842137  | -1.663154 |
| C    | 6.404386  | 5.342777  | -1.812666 |
| C    | 5.063983  | 5.724813  | -1.957780 |
| H    | 2.990412  | 5.149106  | -1.779236 |
| H    | 4.826322  | 6.730747  | -2.306359 |
| H    | 7.199523  | 6.051059  | -2.047501 |
| H    | 7.775229  | 3.758223  | -1.253034 |
| C    | 4.031791  | -4.842137 | 1.663154  |
| C    | 6.733473  | -4.060468 | 1.367826  |
| C    | 6.404387  | -5.342777 | 1.812666  |
| C    | 5.063984  | -5.724813 | 1.957780  |
| C    | 4.343315  | -3.545681 | 1.213056  |
| S    | 5.847341  | -1.526226 | 0.504554  |
| H    | 2.990413  | -5.149106 | 1.779236  |
| H    | 4.826323  | -6.730747 | 2.306359  |
| H    | 7.199523  | -6.051059 | 2.047501  |
| H    | 7.775230  | -3.758222 | 1.253034  |
| N    | -2.431669 | 0.000000  | 0.000000  |
| C    | -3.248249 | -0.983537 | -0.562534 |
| C    | -3.248249 | 0.983536  | 0.562534  |
| C    | -2.909956 | -2.136384 | -1.269765 |
| C    | -4.600725 | -0.630738 | -0.360691 |

|   |           |           |           |
|---|-----------|-----------|-----------|
| C | -2.909956 | 2.136384  | 1.269765  |
| C | -4.600725 | 0.630738  | 0.360691  |
| C | -3.945140 | -2.938217 | -1.745636 |
| H | -1.870793 | -2.405771 | -1.460732 |
| C | -5.614607 | -1.453818 | -0.849778 |
| C | -3.945139 | 2.938217  | 1.745636  |
| H | -1.870793 | 2.405770  | 1.460733  |
| C | -5.614607 | 1.453818  | 0.849779  |
| C | -5.303821 | -2.626119 | -1.545711 |
| H | -3.673886 | -3.837277 | -2.297541 |
| H | -6.656639 | -1.169348 | -0.686215 |
| C | -5.303821 | 2.626119  | 1.545711  |
| H | -3.673885 | 3.837276  | 2.297541  |
| H | -6.656639 | 1.169348  | 0.686215  |
| C | -6.438835 | -3.512973 | -2.072572 |
| C | -6.438835 | 3.512973  | 2.072572  |
| C | -7.324305 | -3.960241 | -0.898302 |
| C | -7.285200 | -2.711971 | -3.075138 |
| C | -5.910262 | -4.763923 | -2.779477 |
| C | -7.285199 | 2.711972  | 3.075139  |
| C | -7.324305 | 3.960240  | 0.898302  |
| C | -5.910262 | 4.763924  | 2.779475  |
| H | -7.776127 | -3.101408 | -0.381658 |
| H | -8.141321 | -4.603195 | -1.260293 |
| H | -6.736718 | -4.528067 | -0.161956 |
| H | -7.723642 | -1.817002 | -2.610409 |
| H | -6.671545 | -2.384551 | -3.927351 |
| H | -8.109886 | -3.332184 | -3.459052 |
| H | -5.298157 | -4.506089 | -3.656386 |
| H | -5.304280 | -5.385529 | -2.103704 |
| H | -6.756146 | -5.374098 | -3.128414 |
| H | -8.109885 | 3.332186  | 3.459053  |
| H | -7.723641 | 1.817002  | 2.610412  |
| H | -6.671543 | 2.384553  | 3.927352  |
| H | -8.141321 | 4.603194  | 1.260293  |
| H | -6.736719 | 4.528065  | 0.161955  |
| H | -7.776127 | 3.101406  | 0.381659  |
| H | -5.298156 | 4.506091  | 3.656384  |
| H | -5.304281 | 5.385529  | 2.103701  |
| H | -6.756145 | 5.374099  | 3.128412  |

**T<sub>1</sub> state of  $\alpha$ -DThBSS-Cz**

| atom | X         | Y         | Z         |
|------|-----------|-----------|-----------|
| C    | -0.314723 | -1.128064 | 0.410352  |
| C    | 1.083551  | -1.121664 | 0.392552  |
| C    | 1.849305  | 0.000000  | -0.000001 |

|   |           |           |           |
|---|-----------|-----------|-----------|
| C | 1.083551  | 1.121663  | -0.392553 |
| C | -0.314723 | 1.128064  | -0.410353 |
| C | -1.024569 | 0.000000  | -0.000001 |
| B | 3.417059  | 0.000000  | -0.000001 |
| C | 4.123142  | 1.274175  | -0.438877 |
| C | 3.469557  | 2.465627  | -0.857992 |
| S | 1.762137  | 2.658496  | -0.933982 |
| S | 1.762137  | -2.658496 | 0.933981  |
| C | 3.469557  | -2.465627 | 0.857992  |
| C | 4.123142  | -1.274176 | 0.438876  |
| C | 5.698038  | 3.167591  | -1.082923 |
| C | 5.698038  | -3.167591 | 1.082924  |
| H | -0.861959 | -2.009266 | 0.752084  |
| H | -0.861959 | 2.009266  | -0.752085 |
| C | 4.342691  | 3.541731  | -1.225811 |
| S | 5.842415  | 1.514504  | -0.506414 |
| C | 6.733698  | 4.044217  | -1.377887 |
| C | 4.037968  | 4.837622  | -1.680712 |
| C | 6.411336  | 5.328394  | -1.828468 |
| C | 5.074581  | 5.716088  | -1.977163 |
| H | 2.997806  | 5.147644  | -1.799123 |
| H | 4.841692  | 6.721662  | -2.329675 |
| H | 7.210780  | 6.031395  | -2.064365 |
| H | 7.773997  | 3.738005  | -1.260444 |
| C | 4.037968  | -4.837622 | 1.680712  |
| C | 6.733698  | -4.044217 | 1.377888  |
| C | 6.411336  | -5.328394 | 1.828469  |
| C | 5.074581  | -5.716088 | 1.977164  |
| C | 4.342691  | -3.541732 | 1.225811  |
| S | 5.842415  | -1.514504 | 0.506414  |
| H | 2.997806  | -5.147645 | 1.799123  |
| H | 4.841692  | -6.721662 | 2.329677  |
| H | 7.210780  | -6.031394 | 2.064366  |
| H | 7.773997  | -3.738004 | 1.260445  |
| N | -2.431386 | 0.000000  | 0.000000  |
| C | -3.247452 | -0.978593 | -0.569507 |
| C | -3.247452 | 0.978593  | 0.569507  |
| C | -2.908738 | -2.127051 | -1.284048 |
| C | -4.600433 | -0.627883 | -0.365398 |
| C | -2.908737 | 2.127051  | 1.284047  |
| C | -4.600433 | 0.627883  | 0.365399  |
| C | -3.943463 | -2.925879 | -1.765496 |
| H | -1.869128 | -2.394501 | -1.475046 |
| C | -5.613914 | -1.448003 | -0.860596 |
| C | -3.943462 | 2.925879  | 1.765496  |
| H | -1.869127 | 2.394500  | 1.475045  |
| C | -5.613913 | 1.448003  | 0.860597  |

|   |           |           |           |
|---|-----------|-----------|-----------|
| C | -5.302509 | -2.615403 | -1.564278 |
| H | -3.671785 | -3.821487 | -2.322847 |
| H | -6.656128 | -1.164952 | -0.695517 |
| C | -5.302507 | 2.615403  | 1.564279  |
| H | -3.671783 | 3.821487  | 2.322847  |
| H | -6.656128 | 1.164953  | 0.695518  |
| C | -6.436951 | -3.498560 | -2.098624 |
| C | -6.436949 | 3.498560  | 2.098625  |
| C | -7.326552 | -3.951267 | -0.929619 |
| C | -7.279683 | -2.691673 | -3.099574 |
| C | -5.907733 | -4.746541 | -2.810333 |
| C | -7.279681 | 2.691674  | 3.099576  |
| C | -7.326551 | 3.951267  | 0.929620  |
| C | -5.907731 | 4.746542  | 2.810332  |
| H | -7.779280 | -3.094826 | -0.409843 |
| H | -8.142992 | -4.591581 | -1.297664 |
| H | -6.741737 | -4.523468 | -0.194442 |
| H | -7.719063 | -1.799092 | -2.631134 |
| H | -6.662851 | -2.359612 | -3.947681 |
| H | -8.103384 | -3.309226 | -3.489944 |
| H | -5.293789 | -4.485114 | -3.684872 |
| H | -5.303234 | -5.371357 | -2.136185 |
| H | -6.753292 | -5.354711 | -3.163628 |
| H | -8.103381 | 3.309227  | 3.489946  |
| H | -7.719061 | 1.799093  | 2.631136  |
| H | -6.662848 | 2.359613  | 3.947682  |
| H | -8.142992 | 4.591581  | 1.297665  |
| H | -6.741737 | 4.523468  | 0.194442  |
| H | -7.779280 | 3.094826  | 0.409844  |
| H | -5.293786 | 4.485116  | 3.684872  |
| H | -5.303232 | 5.371358  | 2.136184  |
| H | -6.753290 | 5.354712  | 3.163628  |

**S<sub>0</sub> state of  $\beta$ -ThBSS**

| atom | X         | Y         | Z         |
|------|-----------|-----------|-----------|
| C    | 3.891413  | -1.545522 | -0.612784 |
| C    | 2.876394  | -0.596664 | -0.454081 |
| C    | 1.564488  | -0.966945 | -0.067282 |
| C    | 1.344607  | -2.344007 | 0.168052  |
| C    | 2.359173  | -3.296522 | 0.030790  |
| C    | 3.626916  | -2.888714 | -0.366866 |
| B    | 0.439146  | 0.092972  | 0.076697  |
| C    | -1.025247 | -0.400046 | 0.030814  |
| C    | -1.308989 | -1.710221 | 0.357746  |
| S    | -0.200986 | -2.999254 | 0.702798  |
| C    | -2.262476 | 0.311313  | -0.287167 |



|   |           |           |           |
|---|-----------|-----------|-----------|
| C | -3.414592 | -0.480416 | -0.098420 |
| H | 4.891778  | -1.226201 | -0.909436 |
| H | 2.149908  | -4.351077 | 0.217642  |
| H | 4.420906  | -3.627660 | -0.484155 |
| S | -3.007638 | -2.101172 | 0.406625  |
| C | -4.704946 | -0.003444 | -0.344805 |
| C | -2.438235 | 1.609550  | -0.802793 |
| C | -3.714513 | 2.087885  | -1.059422 |
| C | -4.846150 | 1.292727  | -0.819658 |
| H | -1.569095 | 2.232998  | -1.012528 |
| H | -3.839163 | 3.094413  | -1.461018 |
| H | -5.842345 | 1.687548  | -1.023484 |
| H | -5.575064 | -0.640360 | -0.180238 |
| C | 0.858311  | 1.573833  | 0.329338  |
| C | 2.128092  | 2.055619  | -0.044050 |
| C | 0.016226  | 2.465978  | 1.026274  |
| C | 2.497897  | 3.390198  | 0.186334  |
| C | 0.382649  | 3.778676  | 1.284925  |
| H | -0.953851 | 2.104340  | 1.373766  |
| C | 1.624032  | 4.246536  | 0.840022  |
| H | 3.484298  | 3.740137  | -0.124481 |
| H | -0.291391 | 4.440409  | 1.830042  |
| H | 1.921224  | 5.279808  | 1.027237  |
| S | 3.350922  | 1.058043  | -0.823088 |

$S_1$  state of  $\beta$ -ThBSS

| atom | X         | Y         | Z         |
|------|-----------|-----------|-----------|
| C    | 3.785976  | -1.719973 | -0.703032 |
| C    | 2.813239  | -0.722758 | -0.505770 |
| C    | 1.492927  | -1.002213 | -0.082111 |
| C    | 1.238670  | -2.365248 | 0.178015  |
| C    | 2.195339  | -3.375811 | -0.001972 |
| C    | 3.476103  | -3.055018 | -0.457064 |
| B    | 0.432076  | 0.115795  | 0.090376  |
| C    | -1.057207 | -0.351697 | 0.104616  |
| C    | -1.402534 | -1.658912 | 0.438085  |
| S    | -0.302293 | -2.931328 | 0.832724  |
| C    | -2.254976 | 0.371231  | -0.268519 |
| C    | -3.444400 | -0.381174 | -0.113085 |
| H    | 4.783941  | -1.436576 | -1.043698 |
| H    | 1.934775  | -4.412925 | 0.220633  |
| H    | 4.222549  | -3.834817 | -0.603969 |
| S    | -3.113668 | -2.014583 | 0.410914  |
| C    | -4.699913 | 0.145693  | -0.411729 |
| C    | -2.354886 | 1.673742  | -0.801856 |
| C    | -3.600339 | 2.199242  | -1.108616 |

|   |           |           |           |
|---|-----------|-----------|-----------|
| C | -4.767368 | 1.446002  | -0.902806 |
| H | -1.446059 | 2.248983  | -0.980607 |
| H | -3.675955 | 3.205873  | -1.521470 |
| H | -5.739922 | 1.877142  | -1.144893 |
| H | -5.604089 | -0.449152 | -0.276577 |
| C | 0.918213  | 1.556786  | 0.363002  |
| C | 2.229841  | 1.973935  | -0.009234 |
| C | 0.151905  | 2.531184  | 1.050002  |
| C | 2.711198  | 3.264986  | 0.223771  |
| C | 0.618729  | 3.819898  | 1.281009  |
| H | -0.841258 | 2.252351  | 1.408595  |
| C | 1.898806  | 4.201808  | 0.860851  |
| H | 3.723954  | 3.531521  | -0.085956 |
| H | -0.017814 | 4.538547  | 1.800466  |
| H | 2.267542  | 5.211736  | 1.041486  |
| S | 3.324463  | 0.907043  | -0.872841 |

**T<sub>1</sub> state of  $\beta$ -ThBSS**

| atom | X         | Y         | Z         |
|------|-----------|-----------|-----------|
| C    | 3.636104  | -1.859875 | -0.816052 |
| C    | 2.734123  | -0.813322 | -0.547489 |
| C    | 1.456629  | -1.055122 | -0.004807 |
| C    | 1.155998  | -2.405935 | 0.268595  |
| C    | 2.029197  | -3.454007 | 0.010354  |
| C    | 3.284569  | -3.171582 | -0.543426 |
| B    | 0.431559  | 0.106869  | 0.211824  |
| C    | -1.051769 | -0.285948 | 0.174085  |
| C    | -1.458416 | -1.672691 | 0.429576  |
| S    | -0.394354 | -2.848090 | 1.054468  |
| C    | -2.223781 | 0.467634  | -0.197416 |
| C    | -3.423001 | -0.296714 | -0.193918 |
| H    | 4.619509  | -1.628654 | -1.230016 |
| H    | 1.743320  | -4.480868 | 0.245027  |
| H    | 3.989026  | -3.980106 | -0.740959 |
| S    | -3.170723 | -1.985779 | 0.240858  |
| C    | -4.642213 | 0.252563  | -0.563982 |
| C    | -2.289274 | 1.805138  | -0.643420 |
| C    | -3.508328 | 2.358516  | -1.012415 |
| C    | -4.678544 | 1.592625  | -0.961618 |
| H    | -1.373886 | 2.392428  | -0.708980 |
| H    | -3.551825 | 3.393299  | -1.352913 |
| H    | -5.631550 | 2.038259  | -1.251034 |
| H    | -5.551358 | -0.349721 | -0.553803 |
| C    | 0.997677  | 1.543049  | 0.417763  |
| C    | 2.275780  | 1.899340  | -0.068607 |
| C    | 0.315932  | 2.528469  | 1.167201  |

|   |           |          |           |
|---|-----------|----------|-----------|
| C | 2.801148  | 3.186165 | 0.117820  |
| C | 0.829113  | 3.802619 | 1.362099  |
| H | -0.649528 | 2.268452 | 1.608846  |
| C | 2.074918  | 4.138827 | 0.819524  |
| H | 3.790539  | 3.428022 | -0.275913 |
| H | 0.268256  | 4.536453 | 1.942751  |
| H | 2.490719  | 5.137015 | 0.965059  |
| S | 3.302816  | 0.793406 | -0.982226 |

$S_0$  state of  $\beta$ -DThBSS

| atom | X         | Y         | Z         |
|------|-----------|-----------|-----------|
| C    | 4.353194  | -1.119211 | 0.432231  |
| C    | 2.955279  | -1.119408 | 0.420936  |
| C    | 2.202981  | 0.003316  | 0.000252  |
| C    | 2.951825  | 1.128243  | -0.420701 |
| C    | 4.349736  | 1.132138  | -0.432443 |
| C    | 5.043025  | 0.007479  | -0.000218 |
| B    | 0.643902  | 0.000990  | 0.000531  |
| C    | -0.061857 | 1.376457  | 0.041237  |
| C    | 0.585748  | 2.494527  | -0.439257 |
| S    | 2.217105  | 2.616904  | -1.018749 |
| S    | 2.225090  | -2.610363 | 1.018798  |
| C    | 0.593398  | -2.492795 | 0.439344  |
| C    | -0.057672 | -1.376579 | -0.040754 |
| C    | -1.382934 | 1.742615  | 0.540687  |
| C    | -1.694144 | 3.101721  | 0.327822  |
| C    | -1.684554 | -3.106817 | -0.328127 |
| C    | -1.377562 | -1.746666 | -0.540460 |
| H    | 4.896925  | -2.007156 | 0.759355  |
| H    | 4.890756  | 2.021672  | -0.759741 |
| H    | 6.133768  | 0.009092  | -0.000392 |
| S    | -0.355527 | -3.955518 | 0.424166  |
| S    | -0.367650 | 3.954320  | -0.424507 |
| C    | -2.910200 | 3.663447  | 0.725958  |
| C    | -2.320322 | 0.949147  | 1.226187  |
| C    | -2.317393 | -0.955848 | -1.225678 |
| C    | -2.898829 | -3.672175 | -0.726537 |
| C    | -3.526375 | 1.500460  | 1.631903  |
| C    | -3.826477 | 2.848163  | 1.375943  |
| C    | -3.521709 | -1.510756 | -1.631637 |
| C    | -3.817623 | -2.859494 | -1.376234 |
| H    | -2.093686 | -0.096407 | 1.436905  |
| H    | -4.249426 | 0.878998  | 2.161457  |
| H    | -4.780681 | 3.263288  | 1.703257  |
| H    | -3.125033 | 4.717197  | 0.543192  |
| H    | -2.094047 | 0.090517  | -1.435926 |

|   |           |           |           |
|---|-----------|-----------|-----------|
| H | -4.246682 | -0.891322 | -2.160938 |
| H | -4.770529 | -3.277448 | -1.703725 |
| H | -3.110381 | -4.726652 | -0.544141 |

**S<sub>1</sub> state of  $\beta$ -DThBSS**

| atom | X         | Y         | Z         |
|------|-----------|-----------|-----------|
| C    | -4.288926 | 1.077324  | 0.513539  |
| C    | -2.887405 | 1.066675  | 0.508094  |
| C    | -2.120286 | -0.004262 | 0.000179  |
| C    | -2.882949 | -1.078268 | -0.507971 |
| C    | -4.284408 | -1.094748 | -0.513555 |
| C    | -4.994756 | -0.010197 | -0.000004 |
| B    | -0.560472 | -0.001092 | 0.000289  |
| C    | 0.122521  | -1.392248 | -0.021678 |
| C    | -0.539969 | -2.506154 | -0.541184 |
| S    | -2.109719 | -2.479437 | -1.262603 |
| S    | -2.120079 | 2.471352  | 1.262298  |
| C    | -0.550367 | 2.504245  | 0.541021  |
| C    | 0.116745  | 1.392881  | 0.021978  |
| C    | 1.390022  | -1.817292 | 0.540820  |
| C    | 1.653386  | -3.196221 | 0.367243  |
| C    | 1.640206  | 3.202972  | -0.367511 |
| C    | 1.382489  | 1.822923  | -0.540655 |
| H    | -4.821269 | 1.937348  | 0.925205  |
| H    | -4.813117 | -1.956917 | -0.925413 |
| H    | -6.084209 | -0.012428 | -0.000052 |
| S    | 0.314201  | 4.018896  | 0.428356  |
| S    | 0.330725  | -4.017287 | -0.429010 |
| C    | 2.824856  | -3.791140 | 0.837507  |
| C    | 2.328849  | -1.040878 | 1.247887  |
| C    | 2.324443  | 1.050115  | -1.247512 |
| C    | 2.809308  | 3.802461  | -0.837872 |
| C    | 3.493259  | -1.626029 | 1.719126  |
| C    | 3.744367  | -2.992420 | 1.508253  |
| C    | 3.486517  | 1.639811  | -1.718851 |
| C    | 3.732083  | 3.007254  | -1.508308 |
| H    | 2.125076  | 0.017034  | 1.420776  |
| H    | 4.219182  | -1.023013 | 2.265540  |
| H    | 4.666452  | -3.437098 | 1.885615  |
| H    | 3.009690  | -4.855989 | 0.690199  |
| H    | 2.124881  | -0.008637 | -1.420151 |
| H    | 4.214929  | 1.039597  | -2.265035 |
| H    | 4.652387  | 3.455552  | -1.885723 |
| H    | 2.989881  | 4.868086  | -0.690872 |

**T<sub>1</sub> state of  $\beta$ -DThBSS**

| atom | X         | Y         | Z         |
|------|-----------|-----------|-----------|
| C    | -4.300053 | 1.090463  | 0.489263  |
| C    | -2.901570 | 1.081050  | 0.483808  |
| C    | -2.137879 | -0.003201 | 0.000312  |
| C    | -2.898174 | -1.089659 | -0.483568 |
| C    | -4.296672 | -1.103156 | -0.489551 |
| C    | -5.003069 | -0.007417 | -0.000267 |
| B    | -0.570344 | -0.000843 | 0.000484  |
| C    | 0.108942  | -1.379135 | -0.015627 |
| C    | -0.567682 | -2.522698 | -0.505794 |
| S    | -2.143515 | -2.527258 | -1.198356 |
| S    | -2.151296 | 2.521037  | 1.198619  |
| C    | -0.575692 | 2.521464  | 0.505844  |
| C    | 0.104604  | 1.379510  | 0.016175  |
| C    | 1.390249  | -1.794122 | 0.530543  |
| C    | 1.656938  | -3.173119 | 0.367380  |
| C    | 1.646907  | 3.178185  | -0.367723 |
| C    | 1.384549  | 1.798231  | -0.530130 |
| H    | -4.834547 | 1.959784  | 0.877720  |
| H    | -4.828437 | -1.974027 | -0.878280 |
| H    | -6.092855 | -0.009022 | -0.000436 |
| S    | 0.317665  | 4.022373  | 0.402332  |
| S    | 0.330271  | -4.020855 | -0.403129 |
| C    | 2.835163  | -3.758566 | 0.829717  |
| C    | 2.329068  | -1.012257 | 1.229764  |
| C    | 2.325728  | 1.018884  | -1.229016 |
| C    | 2.823292  | 3.766966  | -0.830420 |
| C    | 3.503129  | -1.587445 | 1.692156  |
| C    | 3.760098  | -2.951445 | 1.485090  |
| C    | 3.498009  | 1.597430  | -1.691749 |
| C    | 3.750728  | 2.962308  | -1.485366 |
| H    | 2.119820  | 0.043237  | 1.407558  |
| H    | 4.228367  | -0.977008 | 2.231047  |
| H    | 4.687555  | -3.390172 | 1.856246  |
| H    | 3.021355  | -4.824116 | 0.689902  |
| H    | 2.119653  | -0.037317 | -1.406286 |
| H    | 4.225137  | 0.988972  | -2.230323 |
| H    | 4.676823  | 3.403711  | -1.856743 |
| H    | 3.006261  | 4.833154  | -0.691203 |

**S<sub>0</sub> state of  $\beta$ -DThBSS-Cz**

| atom | X         | Y         | Z         |
|------|-----------|-----------|-----------|
| C    | 0.481828  | 1.084193  | 0.532346  |
| C    | -0.913608 | 1.076764  | 0.525626  |
| C    | -1.666650 | 0.000003  | -0.000006 |
| C    | -0.913610 | -1.076758 | -0.525638 |

|   |           |           |           |
|---|-----------|-----------|-----------|
| C | 0.481826  | -1.084191 | -0.532358 |
| C | 1.181764  | 0.000000  | -0.000007 |
| B | -3.223137 | 0.000006  | -0.000005 |
| C | -3.925460 | -0.916325 | -1.029257 |
| C | -3.274540 | -2.029811 | -1.514697 |
| S | -1.644392 | -2.536660 | -1.194505 |
| S | -1.644385 | 2.536665  | 1.194498  |
| C | -3.274533 | 2.029816  | 1.514695  |
| C | -3.925455 | 0.916332  | 1.029253  |
| C | -5.242474 | -0.800825 | -1.645989 |
| C | -5.547236 | -1.883088 | -2.497536 |
| C | -5.547224 | 1.883090  | 2.497544  |
| C | -5.242466 | 0.800830  | 1.645990  |
| H | 1.033766  | 1.910918  | 0.982661  |
| H | 1.033761  | -1.910917 | -0.982675 |
| S | -4.218720 | 3.012705  | 2.601416  |
| S | -4.218731 | -3.012703 | -2.601411 |
| C | -6.759034 | -1.974733 | -3.187669 |
| C | -6.180737 | 0.241507  | -1.538576 |
| C | -6.180730 | -0.241501 | 1.538577  |
| C | -6.759019 | 1.974733  | 3.187683  |
| C | -7.382765 | 0.162148  | -2.225593 |
| C | -7.676844 | -0.944016 | -3.039109 |
| C | -7.382755 | -0.162145 | 2.225601  |
| C | -7.676830 | 0.944016  | 3.039122  |
| H | -5.956389 | 1.109001  | -0.917478 |
| H | -8.107398 | 0.972190  | -2.135191 |
| H | -8.627515 | -0.989254 | -3.572053 |
| H | -6.970172 | -2.825854 | -3.836344 |
| H | -5.956385 | -1.108993 | 0.917474  |
| H | -8.107389 | -0.972187 | 2.135198  |
| H | -8.627499 | 0.989252  | 3.572071  |
| H | -6.970155 | 2.825851  | 3.836362  |
| C | 3.404043  | -1.046933 | 0.432681  |
| C | 3.404046  | 1.046930  | -0.432690 |
| C | 3.066145  | -2.277444 | 0.993740  |
| C | 4.756625  | -0.671623 | 0.277602  |
| C | 3.066151  | 2.277440  | -0.993753 |
| C | 4.756627  | 0.671619  | -0.277604 |
| C | 4.101017  | -3.132577 | 1.366245  |
| H | 2.027170  | -2.567022 | 1.150924  |
| C | 5.770564  | -1.550431 | 0.658191  |
| C | 4.101026  | 3.132573  | -1.366252 |
| H | 2.027178  | 2.567018  | -1.150943 |
| C | 5.770568  | 1.550426  | -0.658187 |
| C | 5.459595  | -2.799831 | 1.203389  |
| H | 3.828751  | -4.092407 | 1.803399  |

|   |          |           |           |
|---|----------|-----------|-----------|
| H | 6.812583 | -1.248547 | 0.529167  |
| C | 5.459603 | 2.799826  | -1.203388 |
| H | 3.828763 | 4.092403  | -1.803408 |
| H | 6.812587 | 1.248542  | -0.529157 |
| N | 2.587059 | -0.000002 | -0.000008 |
| C | 6.594528 | -3.751892 | 1.599850  |
| C | 6.594539 | 3.751886  | -1.599843 |
| C | 7.500216 | 3.066741  | -2.635419 |
| H | 8.322901 | 3.737732  | -2.927244 |
| H | 7.944746 | 2.143775  | -2.236481 |
| H | 6.929195 | 2.804332  | -3.538356 |
| C | 7.419544 | 4.101451  | -0.350357 |
| H | 8.243485 | 4.782919  | -0.613138 |
| H | 6.789751 | 4.593223  | 0.405628  |
| H | 7.856894 | 3.202363  | 0.107479  |
| C | 6.067044 | 5.053269  | -2.210320 |
| H | 5.479839 | 4.862502  | -3.120914 |
| H | 5.436545 | 5.608557  | -1.500310 |
| H | 6.912544 | 5.700753  | -2.485334 |
| C | 7.419538 | -4.101458 | 0.350366  |
| H | 7.856891 | -3.202370 | -0.107468 |
| H | 8.243476 | -4.782927 | 0.613150  |
| H | 6.789747 | -4.593228 | -0.405621 |
| C | 7.500202 | -3.066749 | 2.635429  |
| H | 7.944736 | -2.143784 | 2.236493  |
| H | 6.929178 | -2.804339 | 3.538364  |
| H | 8.322885 | -3.737742 | 2.927257  |
| C | 6.067028 | -5.053274 | 2.210324  |
| H | 5.479819 | -4.862507 | 3.120915  |
| H | 5.436533 | -5.608561 | 1.500311  |
| H | 6.912527 | -5.700759 | 2.485342  |

**S<sub>1</sub> state of  $\beta$ -DThBSS-Cz**

| atom | X         | Y         | Z         |
|------|-----------|-----------|-----------|
| C    | -0.450490 | -1.066938 | 0.557939  |
| C    | 0.947508  | -1.060629 | 0.530096  |
| C    | 1.716847  | 0.000000  | 0.000000  |
| C    | 0.947508  | 1.060629  | -0.530097 |
| C    | -0.450490 | 1.066937  | -0.557939 |
| C    | -1.165150 | 0.000000  | 0.000000  |
| B    | 3.272084  | 0.000000  | 0.000000  |
| C    | 3.954297  | 0.889563  | -1.073233 |
| C    | 3.287020  | 1.989341  | -1.617071 |
| S    | 1.712615  | 2.529637  | -1.154598 |
| S    | 1.712615  | -2.529637 | 1.154598  |
| C    | 3.287020  | -1.989341 | 1.617071  |

|   |           |           |           |
|---|-----------|-----------|-----------|
| C | 3.954297  | -0.889563 | 1.073233  |
| C | 5.221761  | 0.721396  | -1.757765 |
| C | 5.479600  | 1.722603  | -2.724031 |
| C | 5.479599  | -1.722603 | 2.724031  |
| C | 5.221761  | -0.721396 | 1.757765  |
| H | -0.992943 | -1.898664 | 1.012394  |
| H | -0.992943 | 1.898664  | -1.012395 |
| S | 4.153814  | -2.852417 | 2.863177  |
| S | 4.153815  | 2.852417  | -2.863177 |
| C | 6.649042  | 1.735788  | -3.484569 |
| C | 6.166660  | -0.311891 | -1.599297 |
| C | 6.166660  | 0.311891  | 1.599298  |
| C | 6.649041  | -1.735788 | 3.484570  |
| C | 7.329313  | -0.306200 | -2.353671 |
| C | 7.573545  | 0.716164  | -3.286363 |
| C | 7.329313  | 0.306199  | 2.353672  |
| C | 7.573544  | -0.716164 | 3.286363  |
| H | 5.970112  | -1.110946 | -0.882888 |
| H | 8.060017  | -1.105757 | -2.227525 |
| H | 8.493723  | 0.706448  | -3.872417 |
| H | 6.827319  | 2.519151  | -4.222257 |
| H | 5.970112  | 1.110946  | 0.882888  |
| H | 8.060017  | 1.105757  | 2.227526  |
| H | 8.493722  | -0.706448 | 3.872418  |
| H | 6.827318  | -2.519151 | 4.222258  |
| C | -3.388013 | 1.044432  | 0.434004  |
| C | -3.388013 | -1.044432 | -0.434004 |
| C | -3.047700 | 2.277083  | 0.989423  |
| C | -4.741801 | 0.672184  | 0.275786  |
| C | -3.047700 | -2.277083 | -0.989423 |
| C | -4.741801 | -0.672184 | -0.275786 |
| C | -4.080673 | 3.138432  | 1.352024  |
| H | -2.007733 | 2.563004  | 1.148691  |
| C | -5.753633 | 1.557461  | 0.647316  |
| C | -4.080674 | -3.138432 | -1.352024 |
| H | -2.007734 | -2.563004 | -1.148692 |
| C | -5.753633 | -1.557461 | -0.647315 |
| C | -5.440027 | 2.809702  | 1.184591  |
| H | -3.806867 | 4.100283  | 1.783819  |
| H | -6.796481 | 1.259658  | 0.515048  |
| C | -5.440027 | -2.809702 | -1.184591 |
| H | -3.806868 | -4.100283 | -1.783819 |
| H | -6.796481 | -1.259658 | -0.515047 |
| N | -2.571927 | 0.000000  | 0.000000  |
| C | -6.573064 | 3.770481  | 1.565246  |
| C | -6.573064 | -3.770481 | -1.565246 |
| C | -7.488557 | -3.099781 | -2.601646 |



|   |           |           |           |
|---|-----------|-----------|-----------|
| H | -8.310374 | -3.777031 | -2.881309 |
| H | -7.934062 | -2.174683 | -2.208774 |
| H | -6.924494 | -2.843920 | -3.510800 |
| C | -7.388953 | -4.112143 | -0.307546 |
| H | -8.211522 | -4.799688 | -0.558790 |
| H | -6.752173 | -4.593986 | 0.449031  |
| H | -7.827288 | -3.210723 | 0.144713  |
| C | -6.043618 | -5.075580 | -2.166181 |
| H | -5.462664 | -4.891413 | -3.082111 |
| H | -5.406416 | -5.620911 | -1.454422 |
| H | -6.887884 | -5.729462 | -2.429752 |
| C | -7.388953 | 4.112144  | 0.307546  |
| H | -7.827287 | 3.210724  | -0.144712 |
| H | -8.211522 | 4.799688  | 0.558791  |
| H | -6.752173 | 4.593987  | -0.449030 |
| C | -7.488557 | 3.099782  | 2.601647  |
| H | -7.934061 | 2.174683  | 2.208775  |
| H | -6.924493 | 2.843920  | 3.510800  |
| H | -8.310373 | 3.777032  | 2.881309  |
| C | -6.043617 | 5.075580  | 2.166182  |
| H | -5.462664 | 4.891413  | 3.082112  |
| H | -5.406415 | 5.620912  | 1.454422  |
| H | -6.887883 | 5.729462  | 2.429752  |

**T<sub>1</sub> state of  $\beta$ -DThBSS-Cz**

| atom | X         | Y         | Z         |
|------|-----------|-----------|-----------|
| C    | -0.452627 | -1.067129 | 0.556096  |
| C    | 0.943246  | -1.059640 | 0.534212  |
| C    | 1.707095  | -0.000004 | -0.000005 |
| C    | 0.943248  | 1.059634  | -0.534222 |
| C    | -0.452626 | 1.067127  | -0.556102 |
| C    | -1.162784 | 0.000000  | -0.000003 |
| B    | 3.275212  | -0.000006 | -0.000005 |
| C    | 3.950987  | 0.884490  | -1.059441 |
| C    | 3.266054  | 1.984706  | -1.636491 |
| S    | 1.693038  | 2.526742  | -1.193572 |
| S    | 1.693035  | -2.526751 | 1.193560  |
| C    | 3.266044  | -1.984714 | 1.636493  |
| C    | 3.950983  | -0.884498 | 1.059436  |
| C    | 5.230286  | 0.728498  | -1.731094 |
| C    | 5.485006  | 1.725083  | -2.702231 |
| C    | 5.484992  | -1.725082 | 2.702240  |
| C    | 5.230277  | -0.728504 | 1.731093  |
| H    | -0.997472 | -1.895958 | 1.012595  |
| H    | -0.997469 | 1.895956  | -1.012601 |
| S    | 4.151544  | -2.849452 | 2.870570  |

|   |           |           |           |
|---|-----------|-----------|-----------|
| S | 4.151559  | 2.849453  | -2.870558 |
| C | 6.657805  | 1.743035  | -3.455363 |
| C | 6.178204  | -0.300235 | -1.570275 |
| C | 6.178197  | 0.300228  | 1.570272  |
| C | 6.657786  | -1.743028 | 3.455378  |
| C | 7.348026  | -0.288662 | -2.315662 |
| C | 7.591723  | 0.732223  | -3.247001 |
| C | 7.348015  | 0.288661  | 2.315665  |
| C | 7.591706  | -0.732217 | 3.247013  |
| H | 5.980493  | -1.104490 | -0.860842 |
| H | 8.080759  | -1.085378 | -2.183911 |
| H | 8.515047  | 0.727741  | -3.828136 |
| H | 6.832383  | 2.523270  | -4.197165 |
| H | 5.980490  | 1.104477  | 0.860831  |
| H | 8.080750  | 1.085375  | 2.183912  |
| H | 8.515027  | -0.727731 | 3.828153  |
| H | 6.832359  | -2.523256 | 4.197187  |
| C | -3.386327 | 1.044098  | 0.435738  |
| C | -3.386328 | -1.044095 | -0.435742 |
| C | -3.046529 | 2.275585  | 0.993942  |
| C | -4.739870 | 0.671393  | 0.277730  |
| C | -3.046532 | -2.275582 | -0.993947 |
| C | -4.739870 | -0.671389 | -0.277731 |
| C | -4.079910 | 3.134774  | 1.360529  |
| H | -2.006765 | 2.562526  | 1.152217  |
| C | -5.752185 | 1.554643  | 0.652968  |
| C | -4.079914 | -3.134771 | -1.360532 |
| H | -2.006768 | -2.562524 | -1.152224 |
| C | -5.752187 | -1.554638 | -0.652967 |
| C | -5.439141 | 2.805244  | 1.194104  |
| H | -3.806430 | 4.095610  | 1.794771  |
| H | -6.794867 | 1.256208  | 0.520880  |
| C | -5.439145 | -2.805240 | -1.194105 |
| H | -3.806435 | -4.095607 | -1.794775 |
| H | -6.794869 | -1.256203 | -0.520879 |
| N | -2.570466 | 0.000001  | -0.000002 |
| C | -6.572593 | 3.763309  | 1.580394  |
| C | -6.572598 | -3.763304 | -1.580394 |
| C | -7.485200 | -3.087543 | -2.616039 |
| H | -8.307268 | -3.762724 | -2.899948 |
| H | -7.930398 | -2.163402 | -2.220568 |
| H | -6.919022 | -2.828912 | -3.523100 |
| C | -7.391281 | -4.108639 | -0.325533 |
| H | -8.214117 | -4.794331 | -0.580885 |
| H | -6.756534 | -4.593959 | 0.430516  |
| H | -7.829536 | -3.208403 | 0.129157  |
| C | -6.043489 | -5.066697 | -2.185266 |

|   |           |           |           |
|---|-----------|-----------|-----------|
| H | -5.460578 | -4.879646 | -3.099373 |
| H | -5.408255 | -5.615503 | -1.474422 |
| H | -6.888009 | -5.718584 | -2.452922 |
| C | -7.391278 | 4.108644  | 0.325534  |
| H | -7.829534 | 3.208408  | -0.129154 |
| H | -8.214113 | 4.794336  | 0.580888  |
| H | -6.756532 | 4.593964  | -0.430515 |
| C | -7.485194 | 3.087549  | 2.616041  |
| H | -7.930393 | 2.163408  | 2.220571  |
| H | -6.919015 | 2.828918  | 3.523101  |
| H | -8.307261 | 3.762730  | 2.899951  |
| C | -6.043483 | 5.066702  | 2.185266  |
| H | -5.460571 | 4.879651  | 3.099372  |
| H | -5.408250 | 5.615507  | 1.474421  |
| H | -6.888002 | 5.718590  | 2.452923  |
